# Supplementary material for: Binuclear aluminum Lewis acid and its behavior in the polymerization of methyl methacrylate and n-butyl acrylate
Source: Royal Society of Chemistry journal article supplement (doi:10.1039/d0py00572j), 2020-01-01
Supplement: d0py00572j1.pdf [file d0py00572j1.pdf]

## **Binuclear Aluminium Lewis Acid and Its Behavior in the Polymerization of Methyl Methacrylate and n-Butyl acrylate**

Wang Zhe<sup>a</sup>, Zhang Xianhui<sup>a,c</sup>, Liang Hongwen<sup>b</sup>, Xian Mo<sup>\*a</sup> and Wang Xiaowu<sup>\*a</sup>

*a. Key Laboratory of Biobased Materials, Qingdao Institute of Biomass Energy and Bioprocess Technology, Chinese Academy of Sciences, Qingdao, 266101, China;*

*b. China Petroleum and Chemical Corporation Baling Branch, Yueyang, 414014, China;  
lianghw.blsh@sinopec.com*

*c. University of Chinese Academy of Sciences, Beijing, 100049, China.*

*CORRESPONDING AUTHOR FOOTNOTE Tel: +86-532-58782991. E-mail: wangxw@qibebt.ac.cn and  
xianmo@qibebt.ac.cn*

## Experimental Section

### Materials

All syntheses and manipulations of air- and moisture sensitive materials were carried out in flame-dried Schlenk-type glassware on a dual-manifold Schlenk line or in an inert Ar-filled glovebox. Toluene (AR, Sinopharm Chemical Reagent Co., Ltd) were dried over sodium with benzophenone as indicator and then fractionally distilled under nitrogen atmosphere prior to use. Methyl methacrylate (MMA) and Butyl acrylate (nBA) were purchased from Shanghai Aladdin Biochemical Technology Co., Ltd., then dried over CaH<sub>2</sub> overnight, followed by vacuum distillation. Further purification of MMA and nBA involved titration with tri(n-octyl)aluminum to a yellow end point, followed by distillation under reduced pressure. All purified monomers were stored in cap-tight bottles inside a refrigerator at -30°C. Tri(n-octyl)aluminium, acetoin, cyanogen bromide, 1,3-diisopropyl-2-thiourea and PCy<sub>3</sub> were purchased from Shanghai Aladdin Biochemical Technology Co., Ltd. and PEt<sub>3</sub> and 2,6-Di-tert-butyl-4-methylphenol (BHT) were purchased from Shanghai Macklin Biochemical Co., Ltd.. Celite was purchased from Qingdao Purell Biological Technology Co., Ltd.. Deuterium solvents were purchased from Cambridge Isotope Laboratories. 6,6'-methylenebis(2-(tert-butyl)-4-methylphenol) was purchased from SAIN Chemical Technology (Shanghai) Co., Ltd. and other phosphines were purchased from Alfa Aesar (China) Chemicals Co., Ltd.. Literature procedures were employed for the preparation of the following compounds: Al(C<sub>6</sub>F<sub>5</sub>), [Al(mbmp)Me]<sub>2</sub>, MeAl(BHT)<sub>2</sub>, <sup>i</sup>BuAl(BHT)<sub>2</sub> and <sup>i</sup>Bu<sub>2</sub>Al(BHT)<sub>2</sub><sup>[1]</sup>. NHO-1, NHO-2, IAP-3 were synthesized according to the literature<sup>[2]</sup>. Other commercially available reagents were used as received without further purification unless otherwise noted.

### Instruments

Nuclear magnetic resonance (NMR) spectra including <sup>1</sup>H NMR and <sup>31</sup>P NMR were recorded on a Bruker Avance III 400 MHz spectrometer using the residual proton of the deuterated solvent for reference. The molecular weight and polydispersity of polymerizations were calculated using polystyrene standards with narrow molecular weight distribution as references and determined by gel permeation chromatograph (GPC, Viscotek VE2001 GPC, Viscotek Corporation, USA). X-ray diffraction (XRD) was carried out to measure the structure of single crystals. The data of Co1 and Fe1 was collected on Super Nova diffractometer with Mo K-alpha X-ray source ( $\lambda = 0.71073 \text{ \AA}$ ) at

150 K. The collected data were solved using the SUPERFLIP72 program and refined by the SHELX-97 and OLEX274 programs.

### **Characterization of Polymer**

Polymer number-average molecular weight ( $M_n$ ) and molecular weight distributions ( $\mathcal{D} = M_w/M_n$ ) were measured by gel permeation chromatography (GPC) at 35°C and a flow rate of 1 mL/min, with THF (HPLC grade) as an eluent on an Agilent Technologies 1260 Infinity instrument equipped with PL gel 5  $\mu$ m MIXED-C 300 $\times$ 7.5 mm columns. The flow rate is 1.0 mL/min with injection volume 50  $\mu$ L and RI detector. The instrument was calibrated with polystyrene standards, and chromatograms were processed with Agilent software. Matrix-assisted laser desorption/ionization time-of-flight mass spectroscopy (MALDI-TOF MS) analyses were conducted on a Bruker Microflex LRF MS spectrometer equipped with a 337 nm nitrogen laser operating in a positive ion, linear mode. The sample solutions (10 mg/mL in THF), trans-2-[3-(4-tert-butylphenyl)-2-methyl-2-propenylidene] malononitrile (DCTB) solution (10 mg/mL in THF) and sodium trifluoroacetate solution (5 mg/mL) were mixed in a volume ratio of 5:1:1, 2  $\mu$ L of which was then deposited on the target plate and dried before measurement.

### **General Polymerization Procedures.**

Polymerizations were performed in 10 mL Schlenk glass tubes inside the glovebox at ambient temperature (ca. 25°C). A predetermined amount of a Lewis acid (LA) (1 equiv. for bimetallic organoaluminum; 2 equiv. for monomeric organoaluminum) was first dissolved in 500  $\mu$ L (equiv.) of MMA or 680  $\mu$ L (equiv.) of nBA. The solution changed from colorless to yellow and 2 mL of toluene was injected. The polymerization was initiated by rapid addition of LB solution (1 equiv.) via a syringe to the above mixture under vigorous stirring. The solution immediately became colorless and bubbles were generated, in which the solution became sticky and exothermic. After 2 h, 0.1 mL methanol solution containing 5% BHT and 0.24 M HCl was injected to the reaction mixture. 0.2 mL aliquot was taken from the reaction mixture via syringe and mixed with 0.4 mL  $\text{CDCl}_3$ . The mixed aliquot was analyzed by  $^1\text{H}$  NMR to obtain the monomer conversion. The quenched mixture was precipitated by a large amount of methanol and the isolated polymer was filtered and vacuum dried overnight at room temperature.

### **Synthesis of $[\text{Al}(\text{mbmp})\text{Me}]_2$**

To a suspension of 6,6'-methylenebis(2-(tert-butyl)-4-methylphenol) (10.0 g, 29.5 mmol) in 40 mL of hexane was slowly added a 2.0 M solution of trimethylaluminum in hexane (14.75 mL, 29.5 mmol). Instantaneous and vigorous evolution of methane and heat were observed. Upon cooling the reaction

mixture, colorless precipitates formed and then it was filtered, washed with cold hexane (2×10 mL) and dried in *vacuo* to give colorless microcrystals in 94% yield (11.225 g).

$^1\text{H}$  NMR (400 MHz,  $\text{CDCl}_3$ , 298 K):  $\delta$ : 6.94-7.07 (m, Ar-H, 4 H), 4.33 (d,  $^2J = 13.7$  Hz,  $\text{CH}_2$ , 1 H), 3.52 (d,  $^2J = 13.8$  Hz,  $\text{CH}_2$ , 1 H), 2.31 (s,  $\text{CH}_3$ , 3H), 2.23 (s,  $\text{CH}_3$ , 3H), 1.37 (s,  $^t\text{Bu}$ , 9H), 1.21 (s,  $^t\text{Bu}$ , 9H), -0.32 (s, 3H, Me).

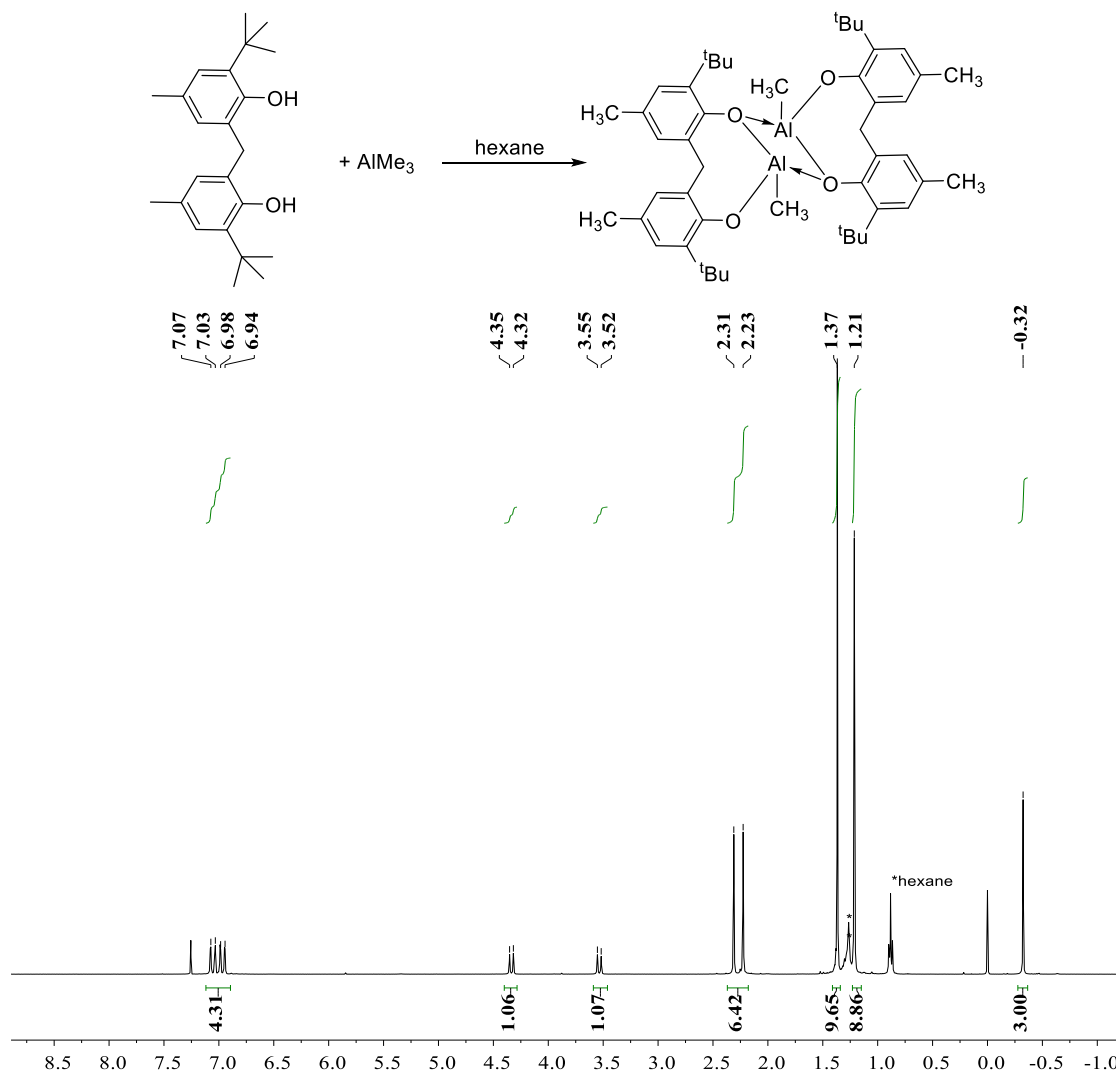

**Figure S1.**  $^1\text{H}$  NMR spectrum of  $[\text{Al}(\text{mbmp})\text{Me}]_2$  (400 MHz,  $\text{CDCl}_3$ , 298 K)

### Mechanistic study---- $^1\text{H}$ NMR spectra

#### NMR Reaction of phosphines with $[\text{Al}(\text{mbmp})\text{Me}]_2$ in 2:1 Ratio

In the glovebox, a glass vial was charged with  $[\text{Al}(\text{mbmp})\text{Me}]_2$  (0.024 mmol, 18.3 mg) and 0.3 mL of  $\text{CDCl}_3$ , then a solution of phosphines (0.048 mmol) in 0.2 mL  $\text{CDCl}_3$  was added to the glass bottle via pipette at ambient temperature. The reaction mixture was transferred to a NMR tube and sealed. The sealed

NMR tube was immediately recorded by NMR spectroscopy.

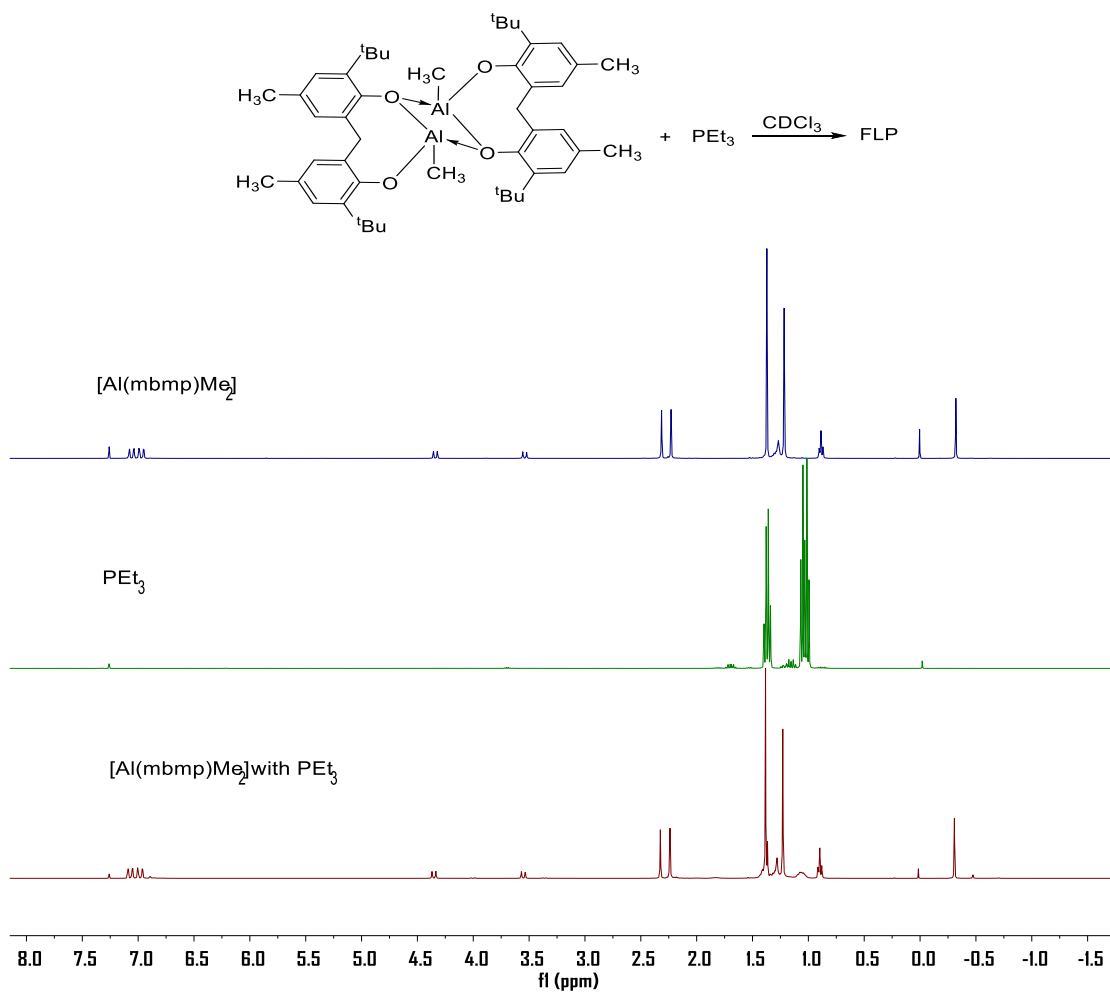

**Figure S2.**  $^1\text{H}$  NMR (400 MHz,  $\text{CDCl}_3$ , 298 K) spectra of reaction of  $[\text{Al}(\text{mbmp})\text{Me}]_2$  with  $\text{PEt}_3$

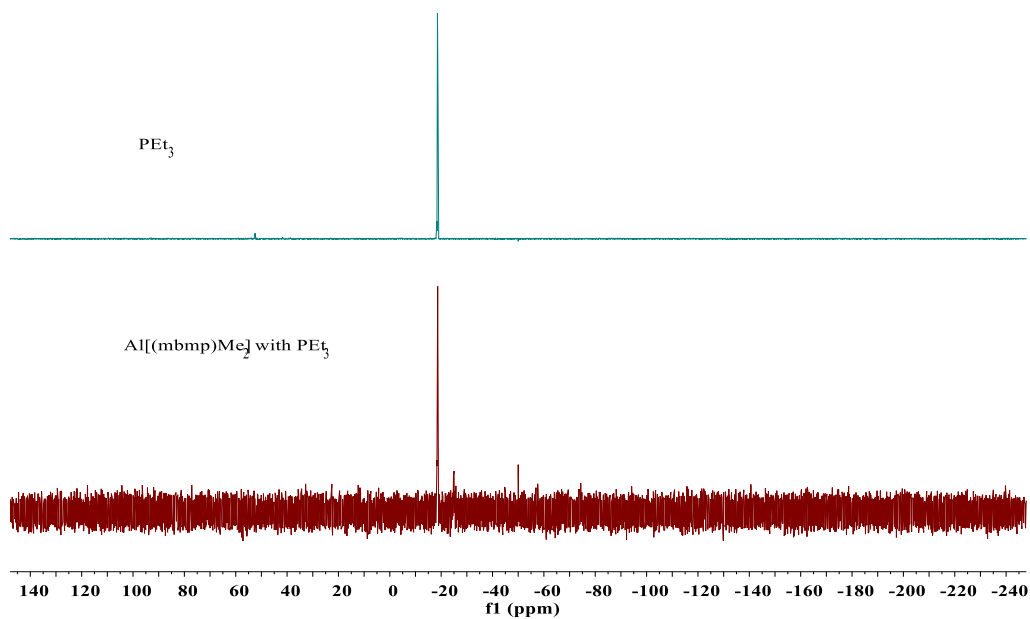

**Figure S3.**  $^{31}\text{P}$   $\{^1\text{H}\}$  (162 MHz,  $\text{CDCl}_3$ , 298 K) spectra of reaction of  $[\text{Al}(\text{mbmp})\text{Me}]_2$  with  $\text{PEt}_3$

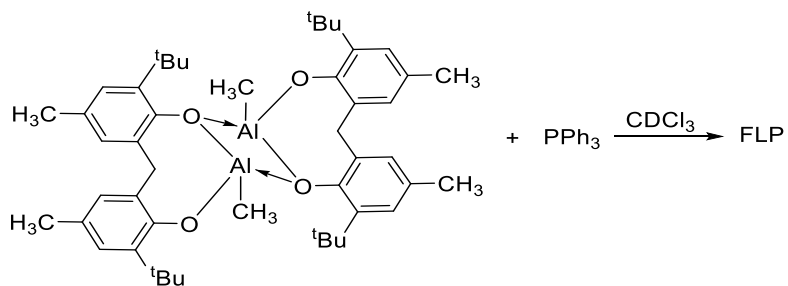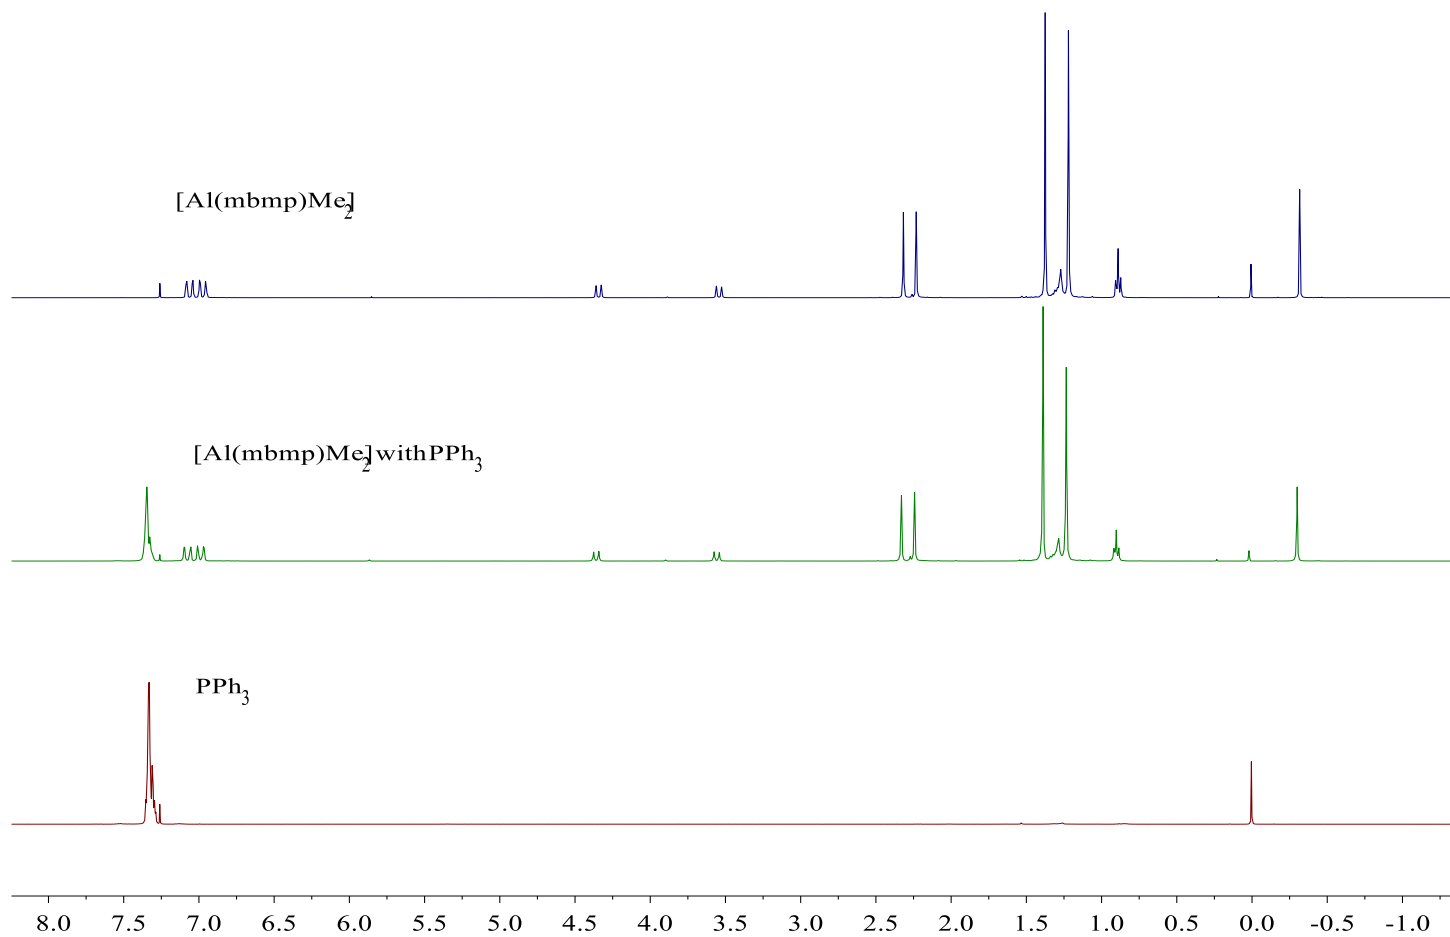

**Figure S4.** <sup>1</sup>H NMR (400 MHz, CDCl<sub>3</sub>, 298 K) spectra of reaction of [Al(mbmp)Me<sub>2</sub>] with PPh<sub>3</sub>

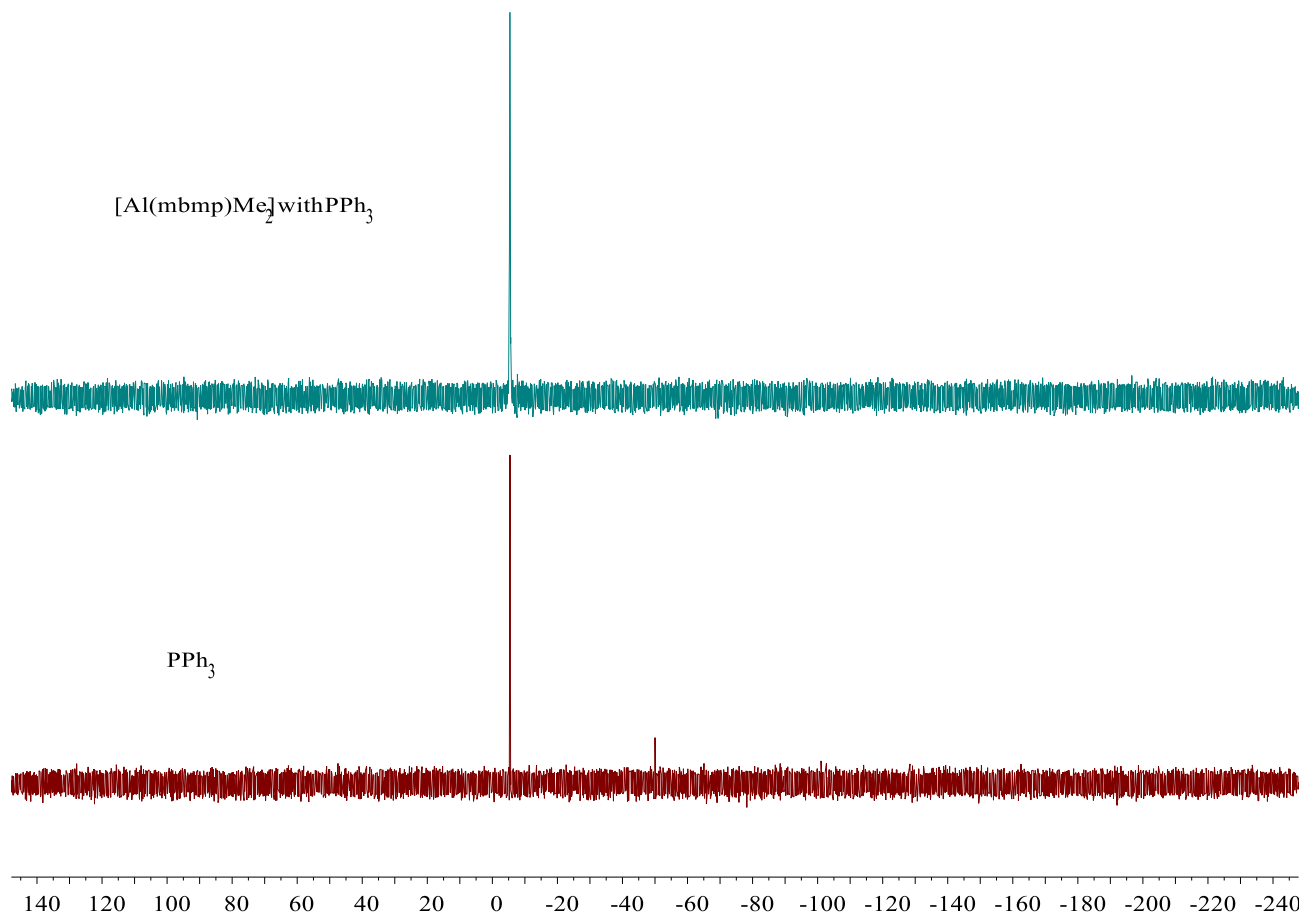

**Figure S5.**  $^{31}\text{P}$   $\{^1\text{H}\}$  (162 MHz,  $\text{CDCl}_3$ , 298 K) spectra of reaction of  $[\text{Al}(\text{mbmp})\text{Me}]_2$  with  $\text{PPh}_3$

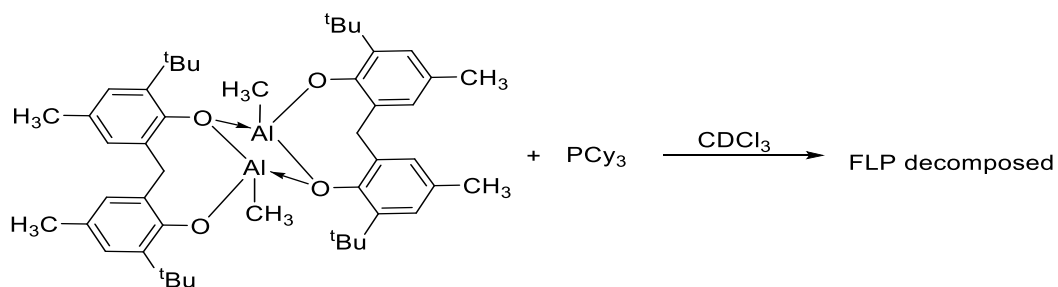

Combination of  $[\text{Al}(\text{mbmp})\text{Me}]_2$  with  $\text{PCy}_3$  formed FLP. However, it decomposed in  $\text{CDCl}_3$ , probably due to the higher basicity of  $\text{PCy}_3$ .

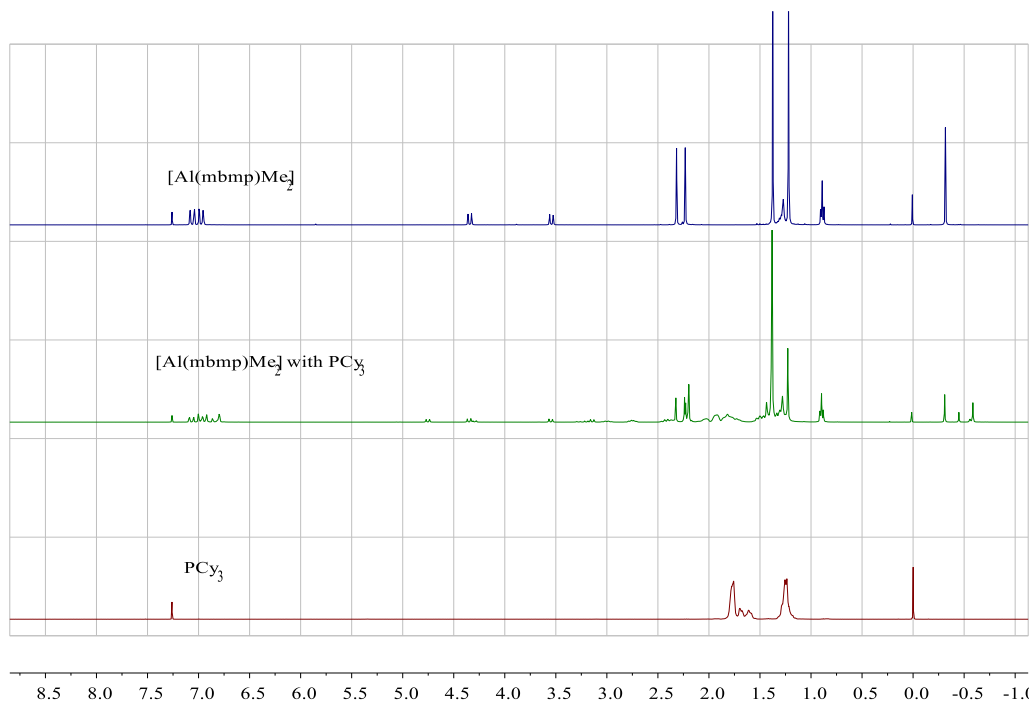

**Figure S6.**  $^1\text{H}$  NMR (400 MHz,  $\text{CDCl}_3$ , 298 K) spectra of reaction of  $[\text{Al}(\text{mbmp})\text{Me}]_2$  with  $\text{PCy}_3$

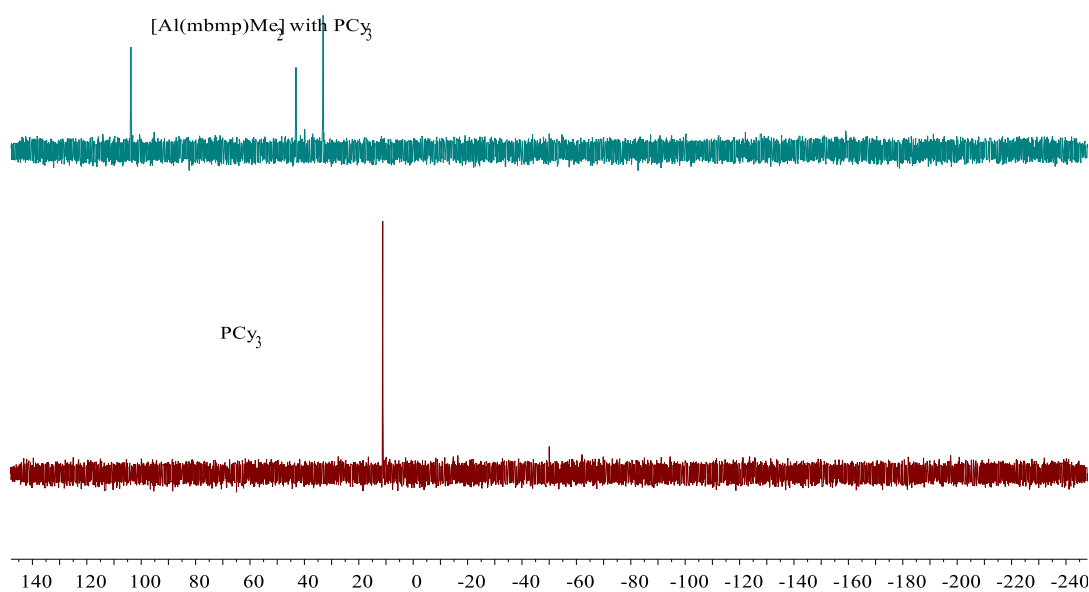

**Figure S7.**  $^{31}\text{P}$   $\{^1\text{H}\}$  (162 MHz,  $\text{CDCl}_3$ , 298 K) spectra of reaction of  $[\text{Al}(\text{mbmp})\text{Me}]_2$  with  $\text{PCy}_3$

### NMR Reaction of phosphines with $\text{MeAl}(\text{BHT})_2$ in 1:1 Ratio

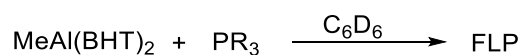

In the glovebox, a glass vial was charged with  $\text{MeAl}(\text{BHT})_2$  (0.043 mmol, 20 mg) and 0.3 mL of  $\text{C}_6\text{D}_6$ , then a solution of phosphines (0.043 mmol) in 0.2 mL of  $\text{C}_6\text{D}_6$  was added to the vial via pipette at ambient temperature. The reaction mixture was transferred to a NMR tube and sealed. The sealed NMR tube was immediately recorded by NMR spectroscopy. In general, there is almost no chemical shift in  $^{31}\text{P}$   $\{^1\text{H}\}$



NMR compared to the free phosphine, indicating non-interacting behavior of LA and LB.

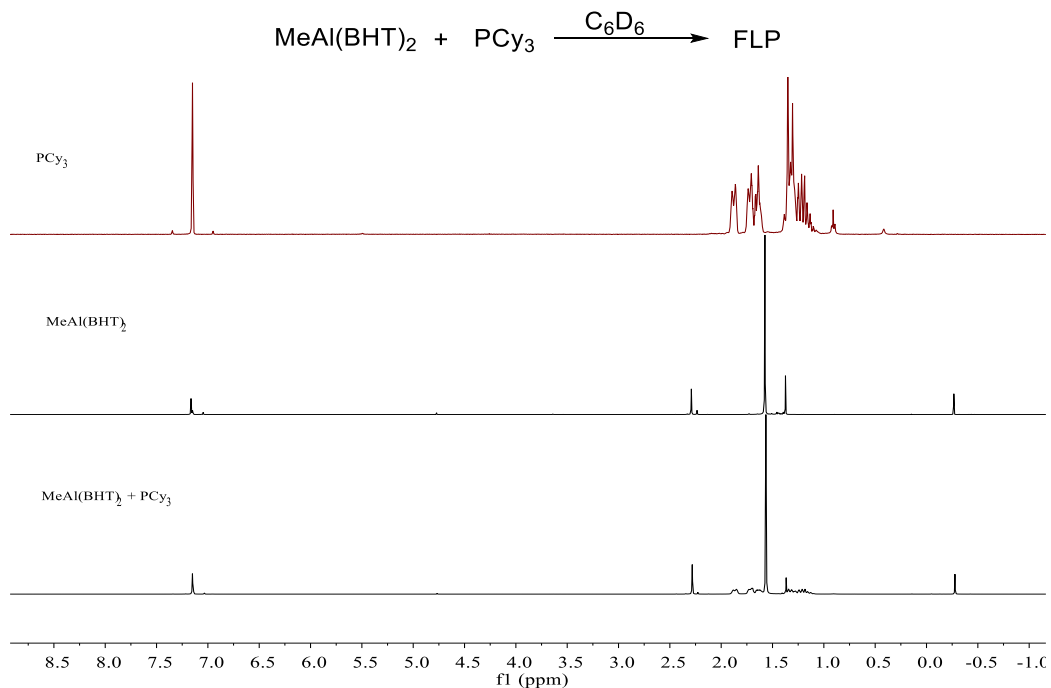

**Figure S8.** <sup>1</sup>H NMR (400 MHz, C<sub>6</sub>D<sub>6</sub>, 298 K) spectra of reaction of MeAl(BHT)<sub>2</sub> with PCy<sub>3</sub>

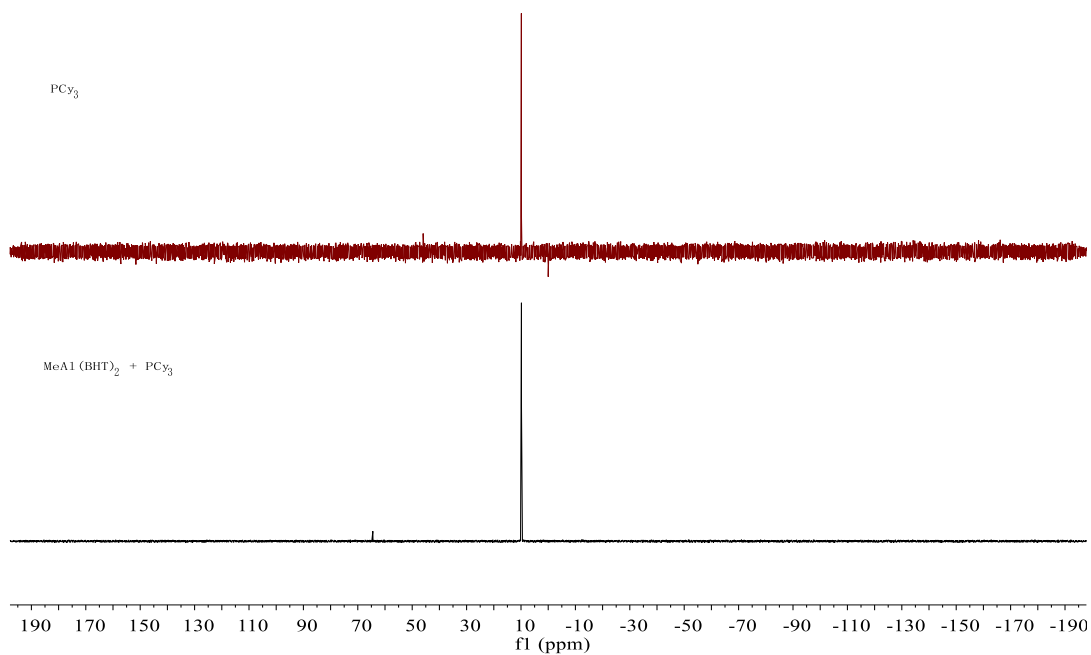

**Figure S9.** <sup>31</sup>P {<sup>1</sup>H} (162 MHz, C<sub>6</sub>D<sub>6</sub>, 298 K) spectra of reaction of MeAl(BHT)<sub>2</sub> with PCy<sub>3</sub>

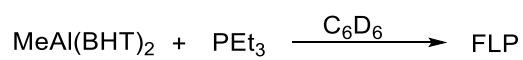

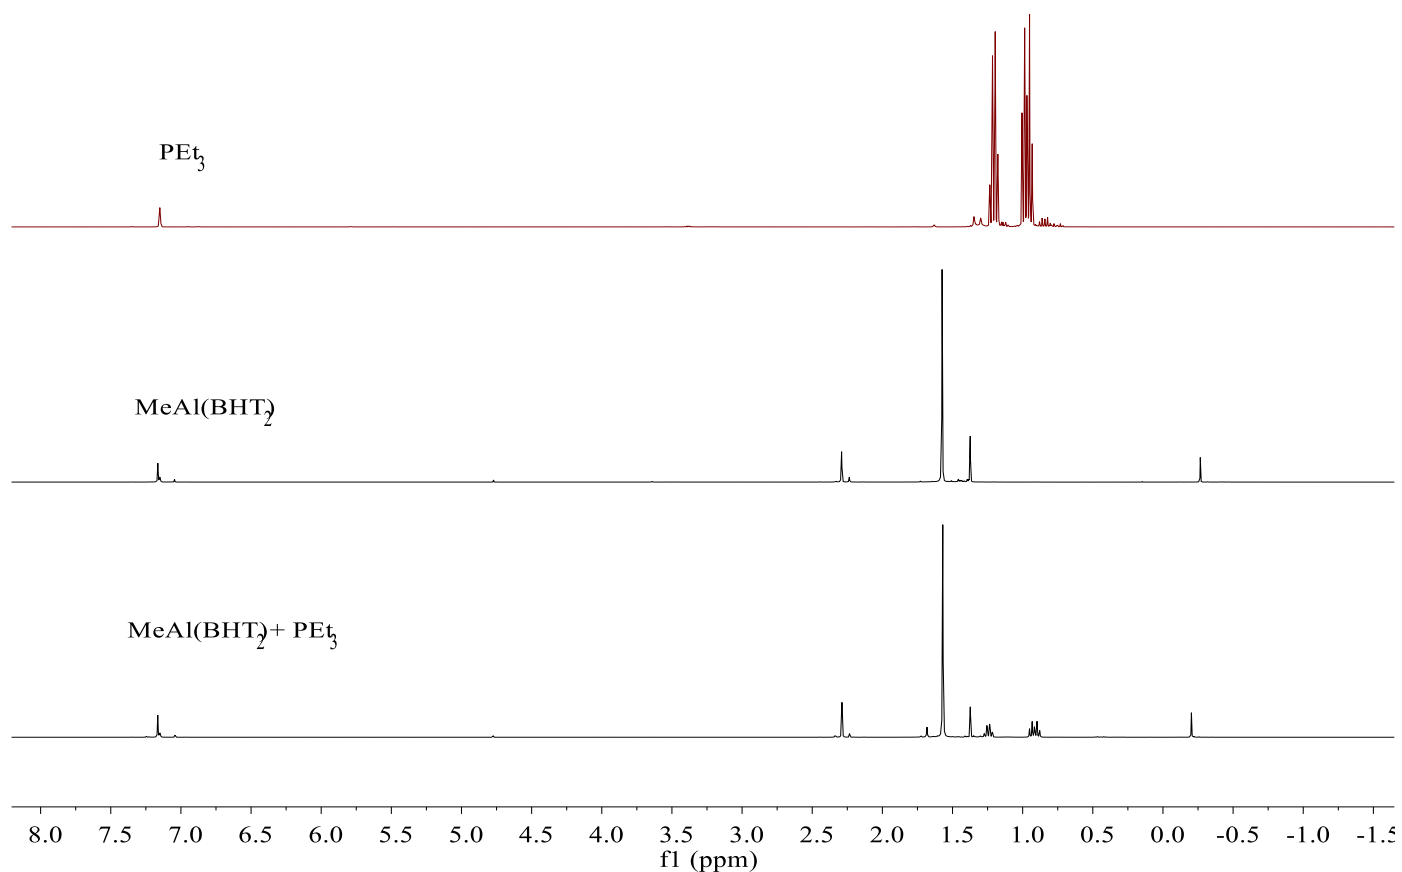

**Figure S10.**  $^1\text{H}$  NMR (400 MHz,  $\text{C}_6\text{D}_6$ , 298 K) spectra of reaction of  $\text{MeAl}(\text{BHT})_2$  with  $\text{PEt}_3$

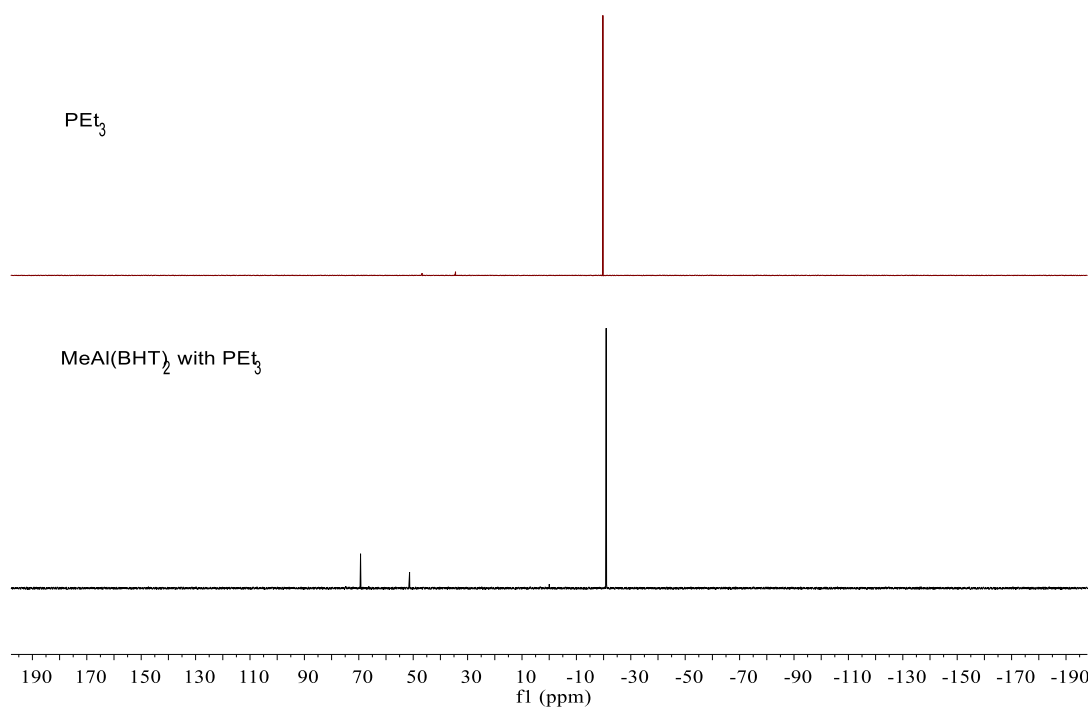

**Figure S11.**  $^{31}\text{P}$   $\{^1\text{H}\}$  (162 MHz,  $\text{C}_6\text{D}_6$ , 298 K) spectra of reaction of  $\text{MeAl}(\text{BHT})_2$  with  $\text{PEt}_3$

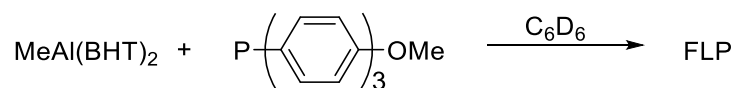

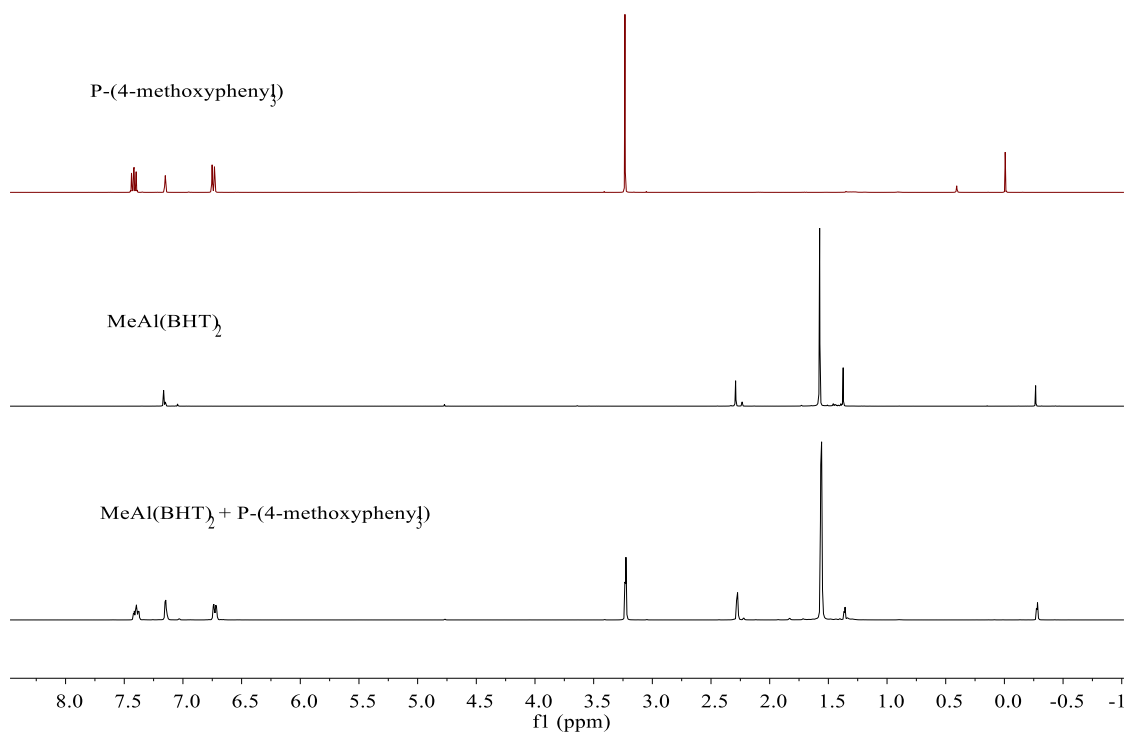

**Figure S12.**  $^1\text{H}$  NMR (400 MHz,  $\text{C}_6\text{D}_6$ , 298 K) spectra of reaction of  $\text{MeAl}(\text{BHT})_2$  with  $\text{P}(\text{4-methoxyphenyl})_3$

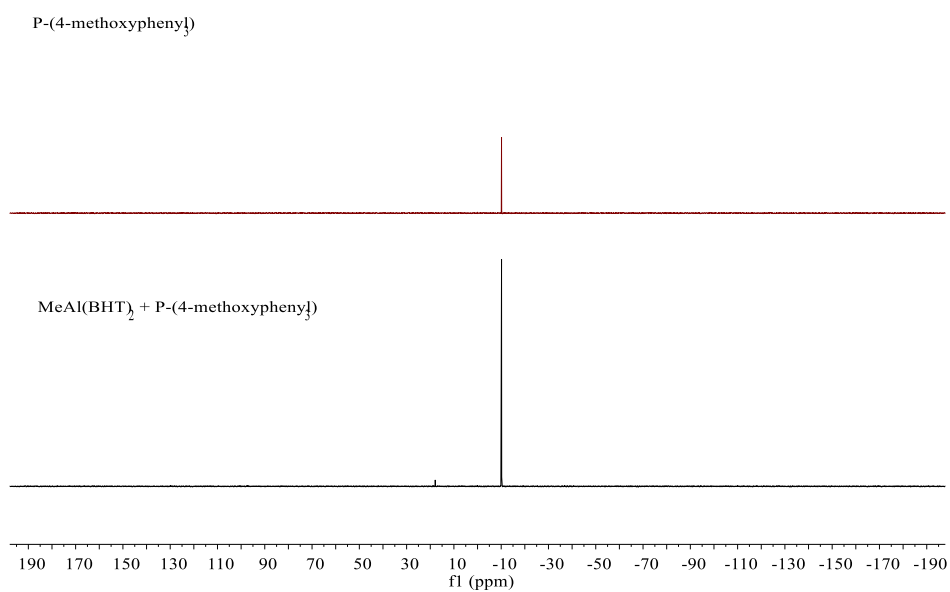

**Figure S13.**  $^{31}\text{P}$   $\{^1\text{H}\}$  (162 MHz,  $\text{C}_6\text{D}_6$ , 298 K) spectra of reaction of  $\text{MeAl}(\text{BHT})_2$  with  $\text{P}(\text{4-methoxyphenyl})_3$

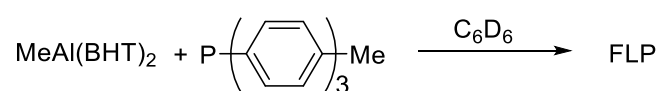

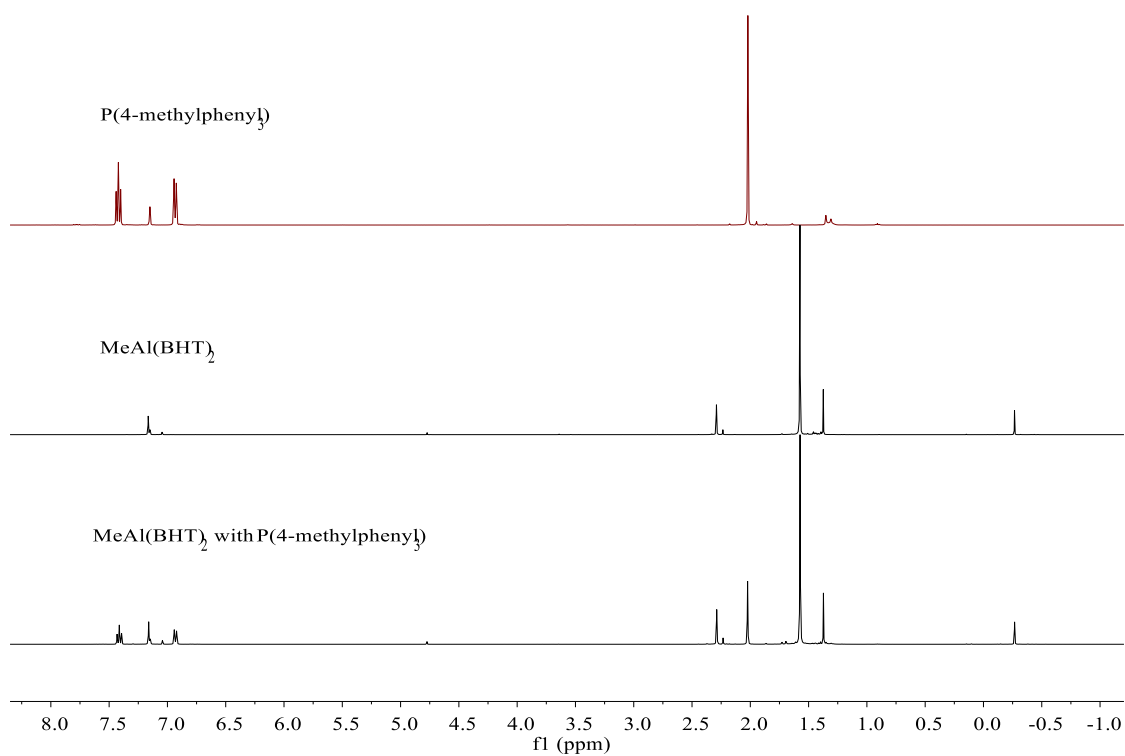

**Figure S14.**  $^1\text{H}$  NMR (400 MHz,  $\text{C}_6\text{D}_6$ , 298 K) spectra of reaction of  $\text{MeAl}(\text{BHT})_2$  with  $\text{P}(\text{4-methylphenyl})_3$

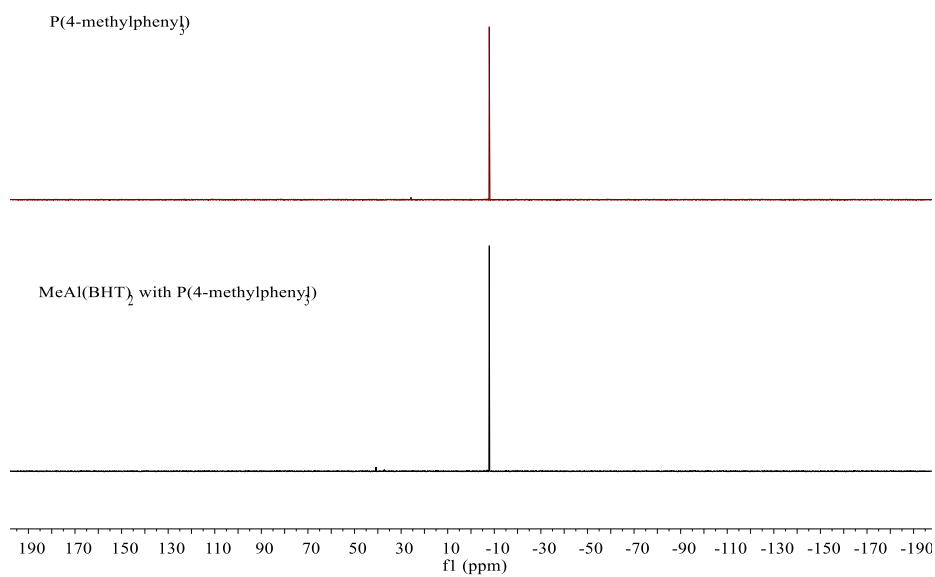

**Figure S15.**  $^{31}\text{P}$   $\{^1\text{H}\}$  (162 MHz,  $\text{C}_6\text{D}_6$ , 298 K) spectra of reaction of  $\text{MeAl}(\text{BHT})_2$  with  $\text{P}(\text{4-methylphenyl})_3$

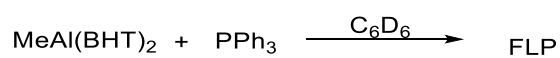

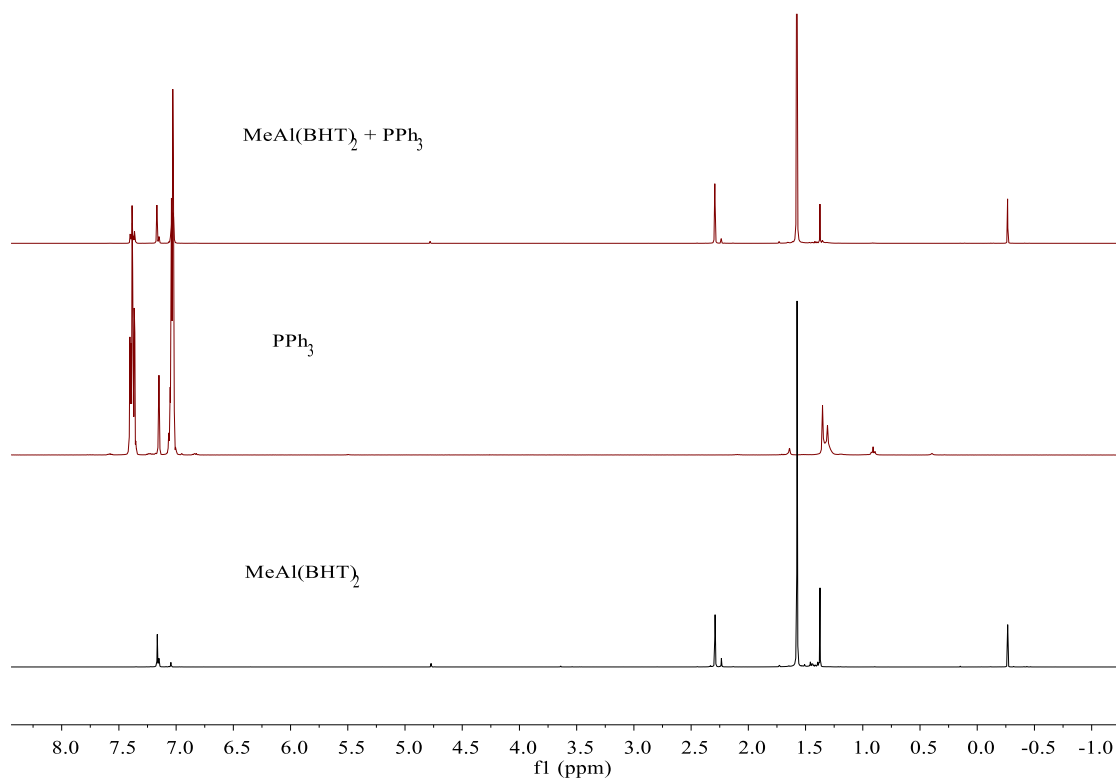

**Figure S16.**  $^1\text{H}$  NMR (400 MHz,  $\text{C}_6\text{D}_6$ , 298 K) spectra of reaction of  $\text{MeAl}(\text{BHT})_2$  with  $\text{PPh}_3$

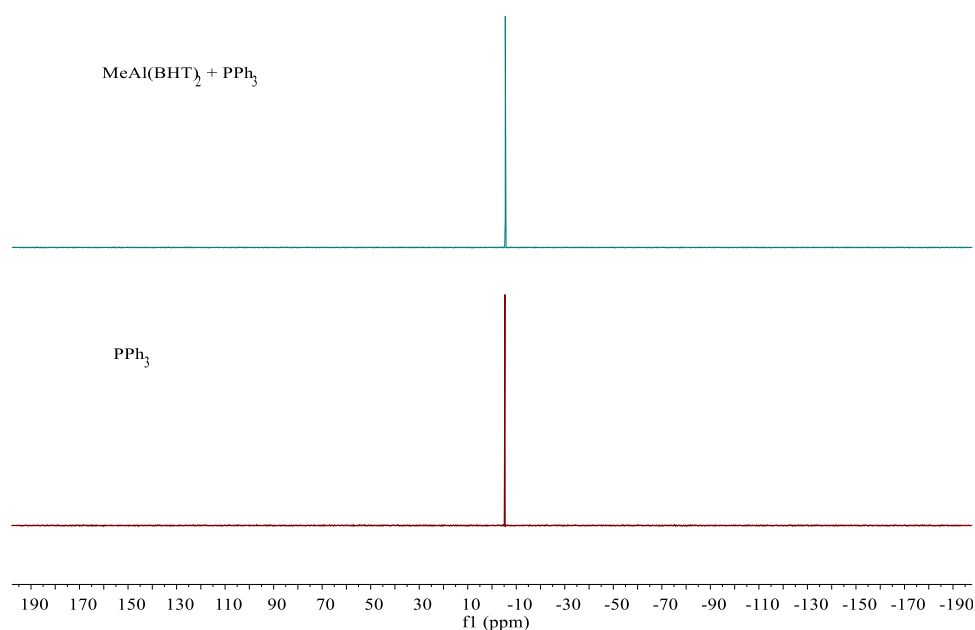

**Figure S17.**  $^{31}\text{P}$   $\{^1\text{H}\}$  (162 MHz,  $\text{C}_6\text{D}_6$ , 298 K) spectra of reaction of  $\text{MeAl}(\text{BHT})_2$  with  $\text{PPh}_3$

### NMR Reaction of $\text{MeAl}(\text{BHT})_2$ with MMA and nBA in 1:1 Ratio

In the glovebox, a glass vial was charged with  $\text{MeAl}(\text{BHT})_2$  (0.043 mmol, 20 mg) and 0.5 mL of  $\text{CDCl}_3$  or  $\text{C}_6\text{D}_6$ , then MMA or nBA (0.043 mmol) was injected via a micro-syringe at ambient temperature. The reaction mixture was transferred to a NMR tube and sealed. The sealed NMR tube was immediately

recorded by NMR spectroscopy.

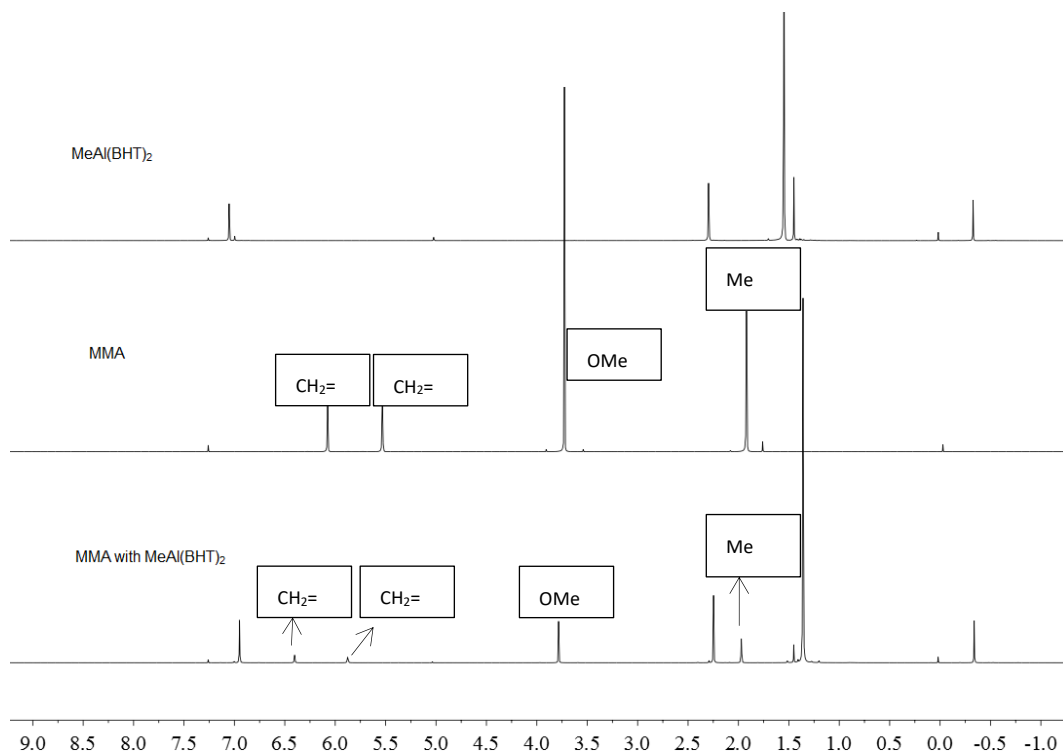

**Figure S18.**  $^1\text{H}$  NMR spectra for reaction of  $\text{MeAl(BHT)}_2$  with MMA (400 MHz,  $\text{CDCl}_3$ , 298 K)

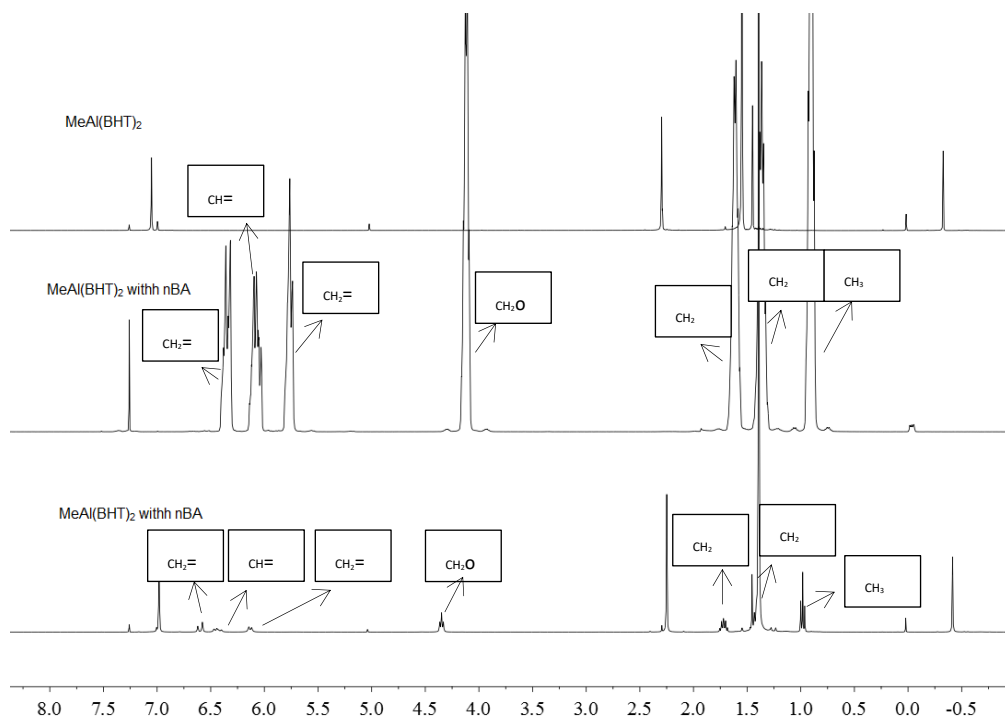

**Figure S19.**  $^1\text{H}$  NMR spectra for reaction of  $\text{MeAl(BHT)}_2$  with nBA (400 MHz,  $\text{CDCl}_3$ , 298 K)

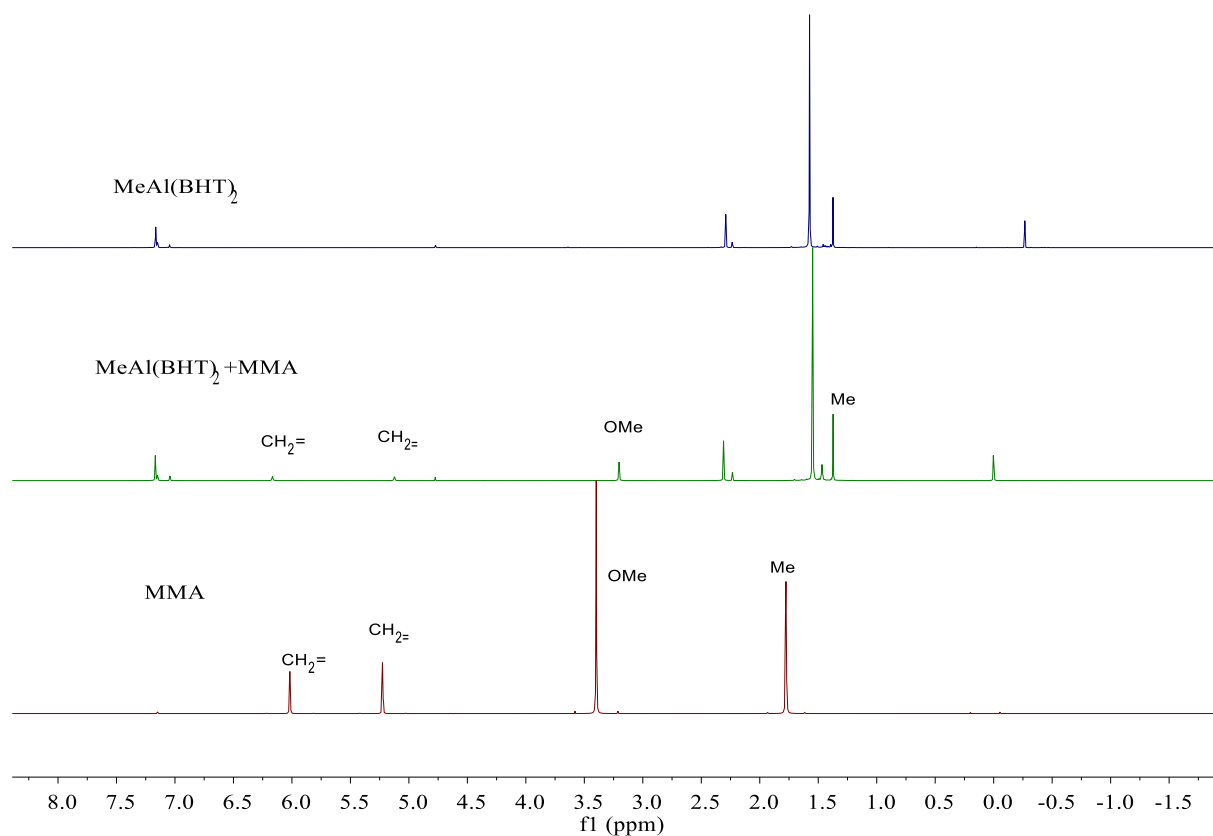

**Figure S20.**  $^1\text{H}$  NMR spectra for reaction of  $\text{MeAl}(\text{BHT})_2$  with MMA (400 MHz,  $\text{C}_6\text{D}_6$ , 298 K)

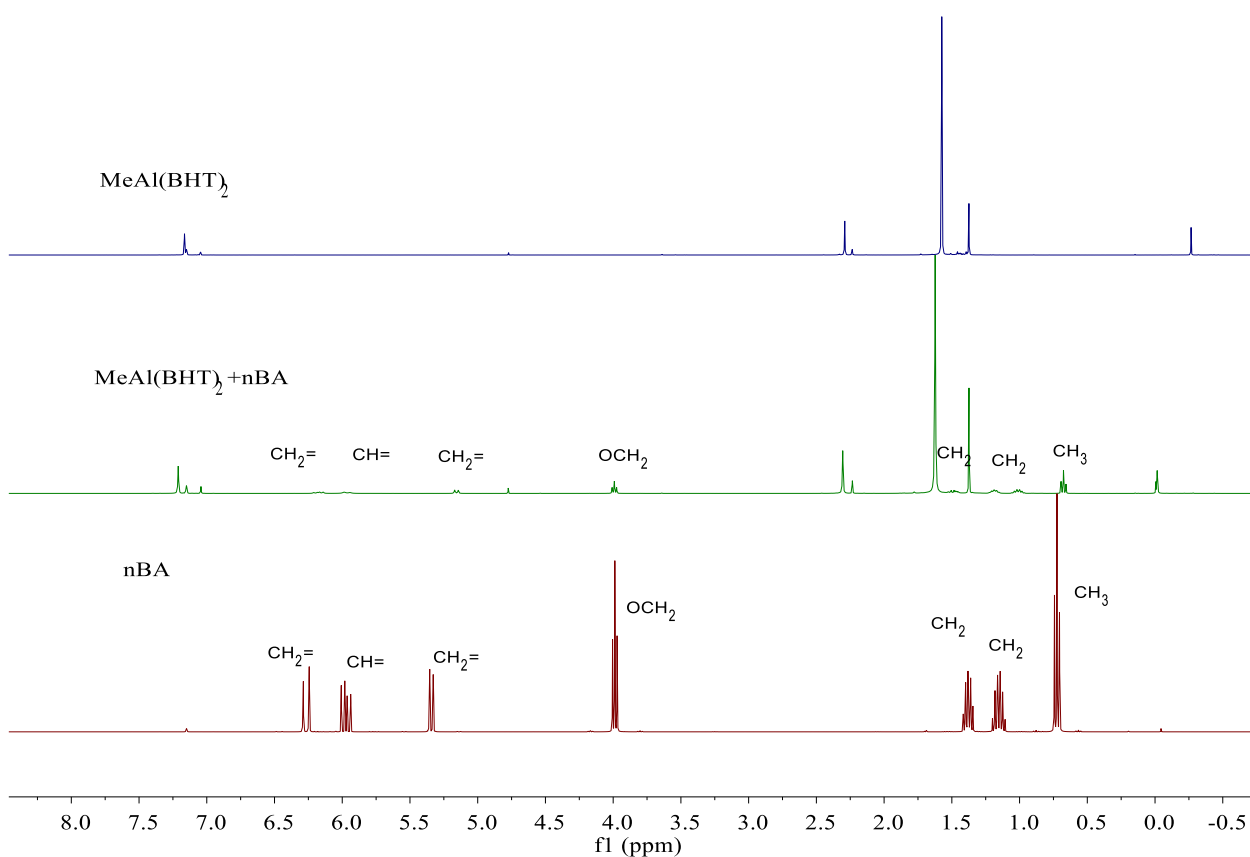

**Figure S21.**  $^1\text{H}$  NMR spectrum for reaction of  $\text{MeAl}(\text{BHT})_2$  with nBA (400 MHz,  $\text{C}_6\text{D}_6$ , 298 K)

### NMR Reaction of $[\text{Al}(\text{mbmp})\text{Me}]_2$ with MMA and nBA in 1:2 Ratio

In the glovebox, a glass vial was charged with  $[\text{Al}(\text{mbmp})\text{Me}]_2$  (0.0215 mmol, 16.4 mg) and 0.5 mL of  $\text{CDCl}_3$ , then MMA or nBA (0.043 mmol) was injected *via* a micro-syringe at ambient temperature. The reaction mixture was transferred to a NMR tube and sealed. The sealed NMR tube was immediately recorded by NMR spectroscopy.

### NMR Reaction of $[\text{Al}(\text{mbmp})\text{Me}]_2$ with MMA in 1:2 and 1:10 Ratio

In the glovebox, a glass vial was charged with  $[\text{Al}(\text{mbmp})\text{Me}]_2$  (0.0215 mmol, 16.4 mg) and 0.5 mL of  $\text{CDCl}_3$ , then required amount of MMA was injected *via* a micro-syringe at ambient temperature. The reaction mixture was transferred to a NMR tube and sealed. The sealed NMR tube was immediately recorded by NMR spectroscopy.

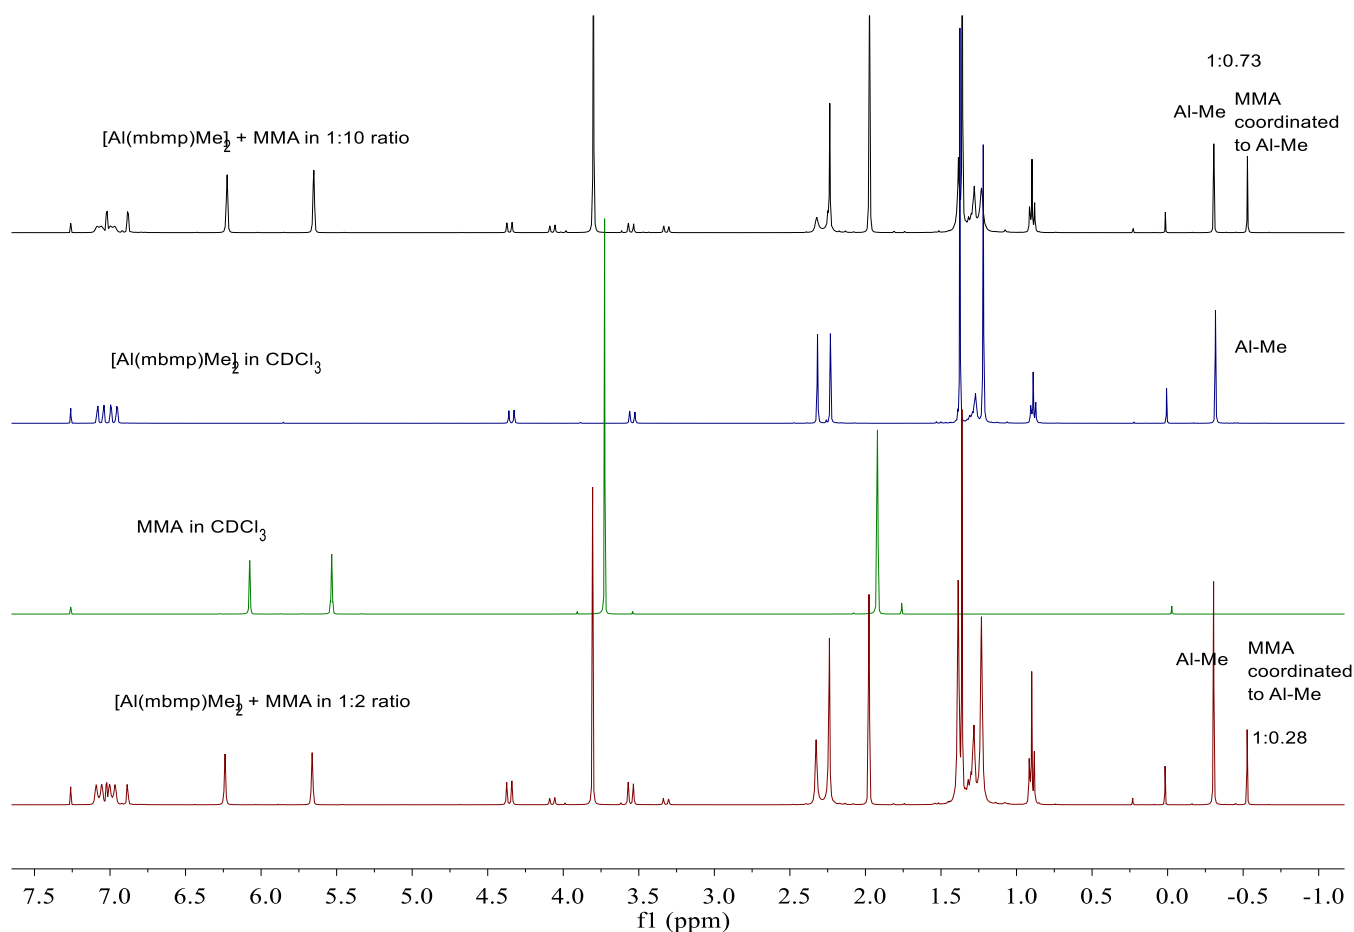

**Figure S22.**  $^1\text{H}$  NMR spectra for reaction of  $[\text{Al}(\text{mbmp})\text{Me}]_2$  with MMA (400 MHz,  $\text{CDCl}_3$ , 298 K )



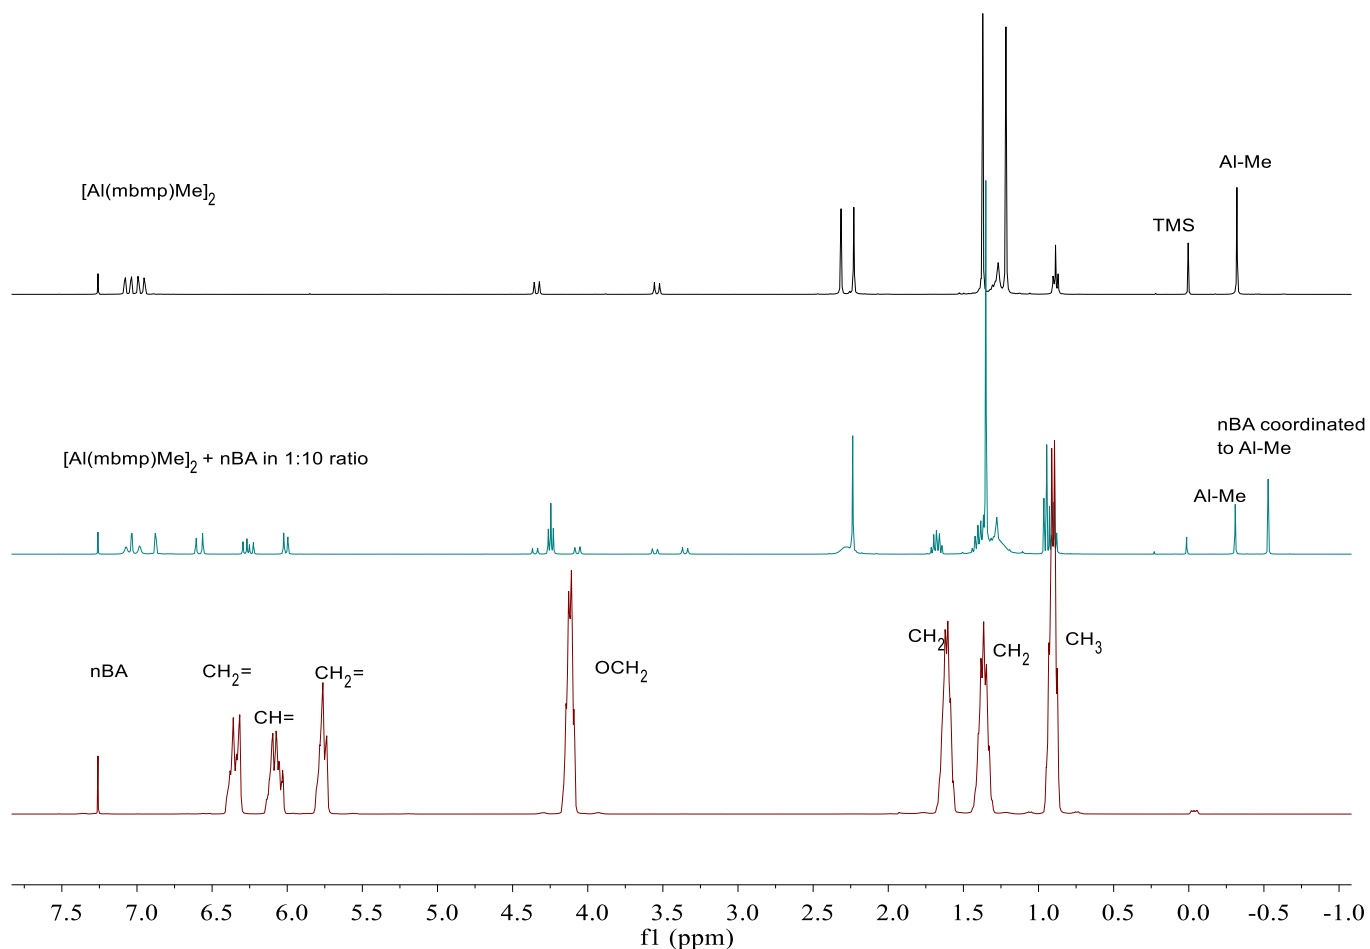

**Figure S23.**  $^1\text{H}$  NMR spectra for reaction of  $[\text{Al}(\text{mbmp})\text{Me}]_2$  with nBA (400 MHz,  $\text{CDCl}_3$ , 298 K)

### NMR Reaction of $\text{PEt}_3$ with $[\text{Al}(\text{mbmp})\text{Me}]_2 \cdot \text{MMA}$ or nBA in 2:1:2 Ratio

In the glovebox, a 5 mL glass vial was charged with  $\text{PEt}_3$  (0.043 mmol, 5.0 mg) and 0.2 mL of  $\text{CDCl}_3$ , while another vial was added to  $[\text{Al}(\text{mbmp})\text{Me}]_2$  (0.0215 mmol, 16.4mg), 0.3 mL of  $\text{CDCl}_3$  and MMA or nBA (0.043mmol). The two vials were mixed *via* a syringe at ambient temperature. The reaction mixture was sealed and recorded immediately by NMR spectroscopy.

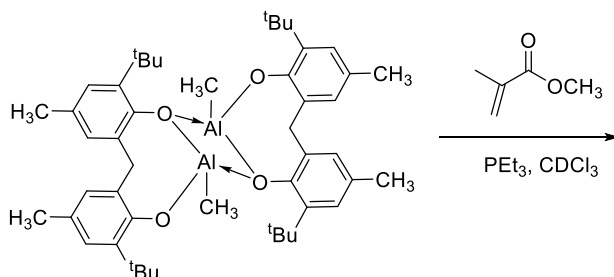

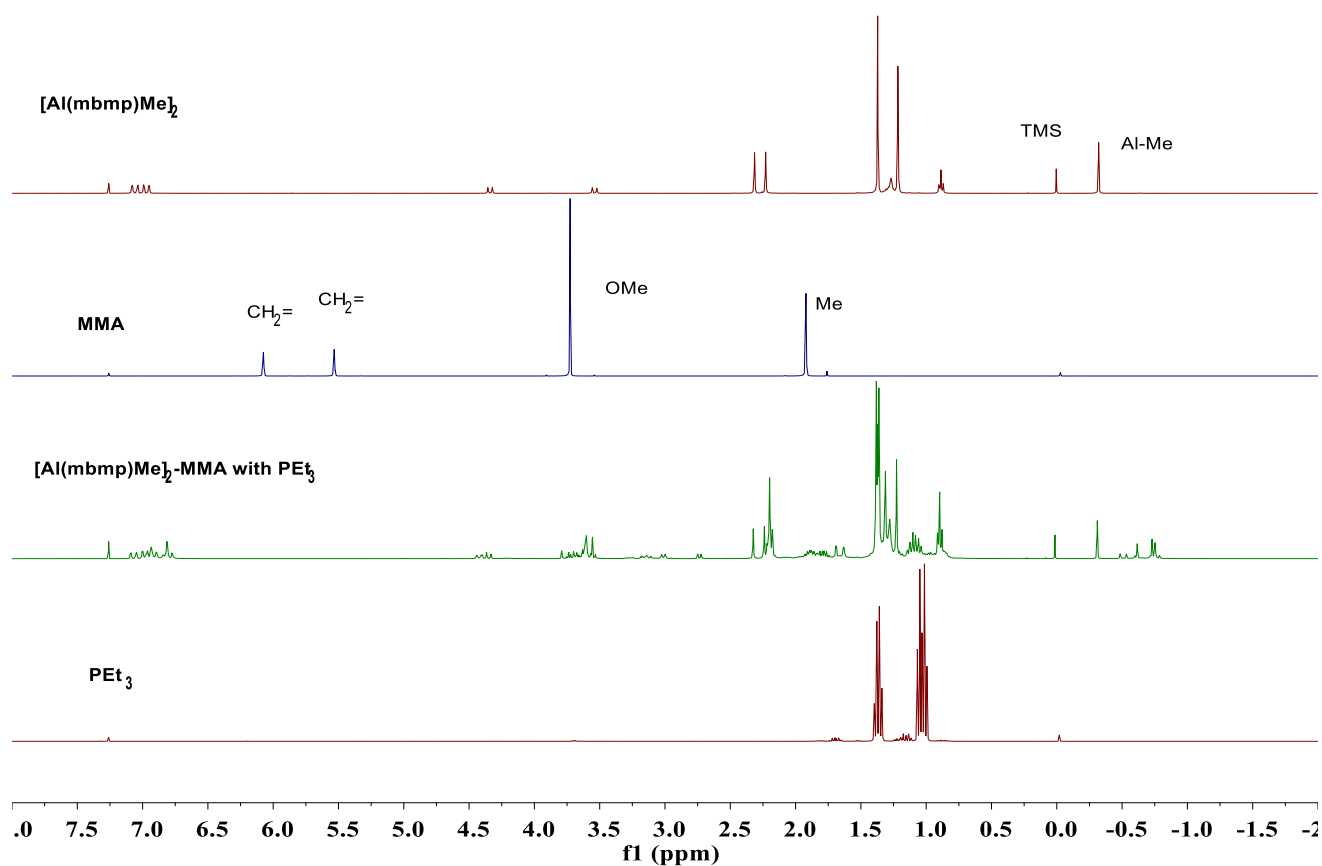

**Figure S24.**  $^1\text{H}$  NMR spectra for reaction of PEt<sub>3</sub> with [Al(mbmp)Me]<sub>2</sub>·MMA (400 MHz, CDCl<sub>3</sub>, 298 K)

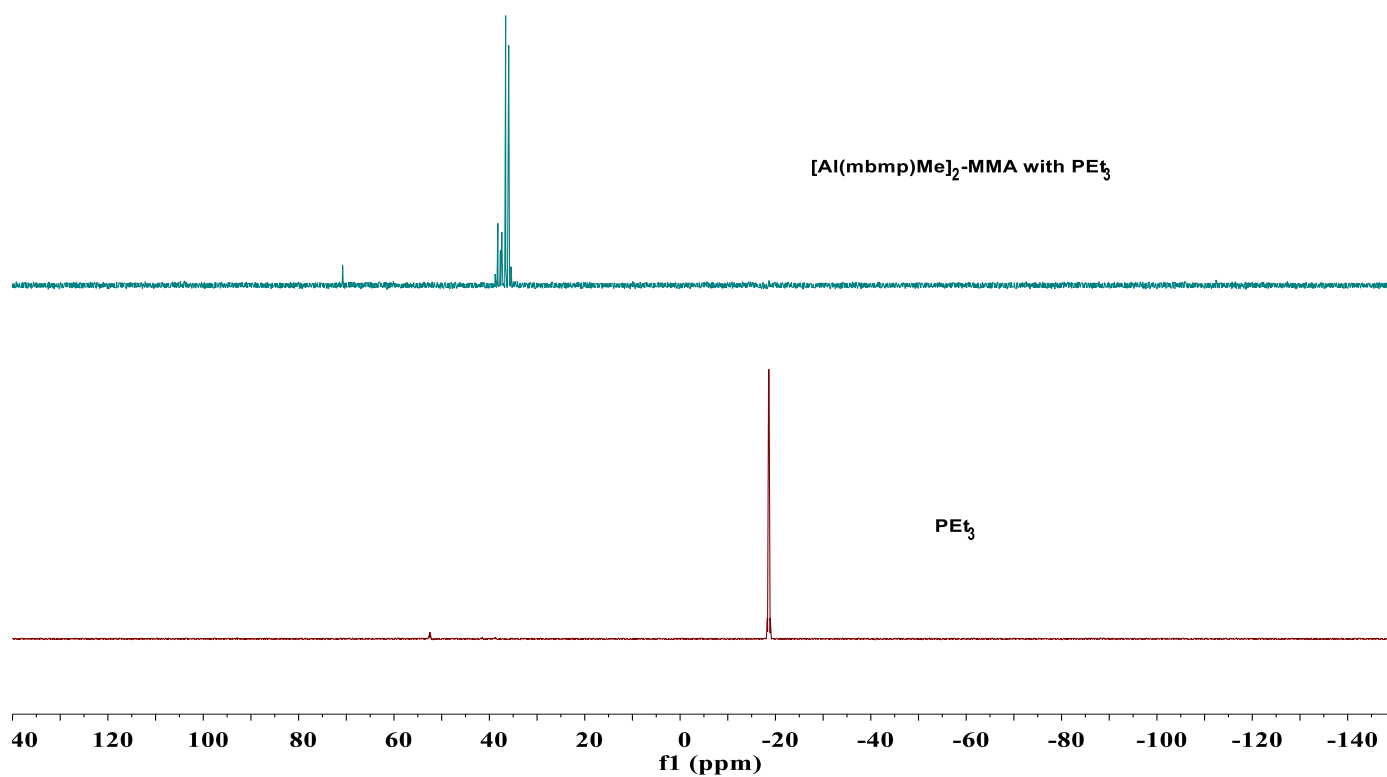

**Figure S25.**  $^{31}\text{P}$  { $^1\text{H}$ } (162 MHz, CDCl<sub>3</sub>, 298 K) spectra for reaction of PEt<sub>3</sub> with [Al(mbmp)Me]<sub>2</sub>·MMA

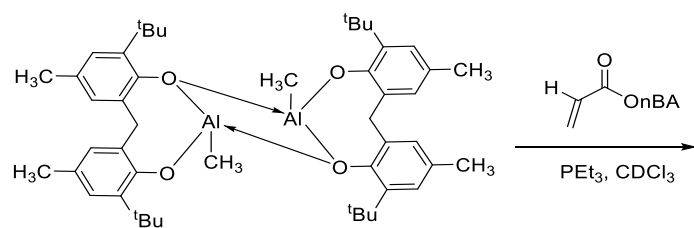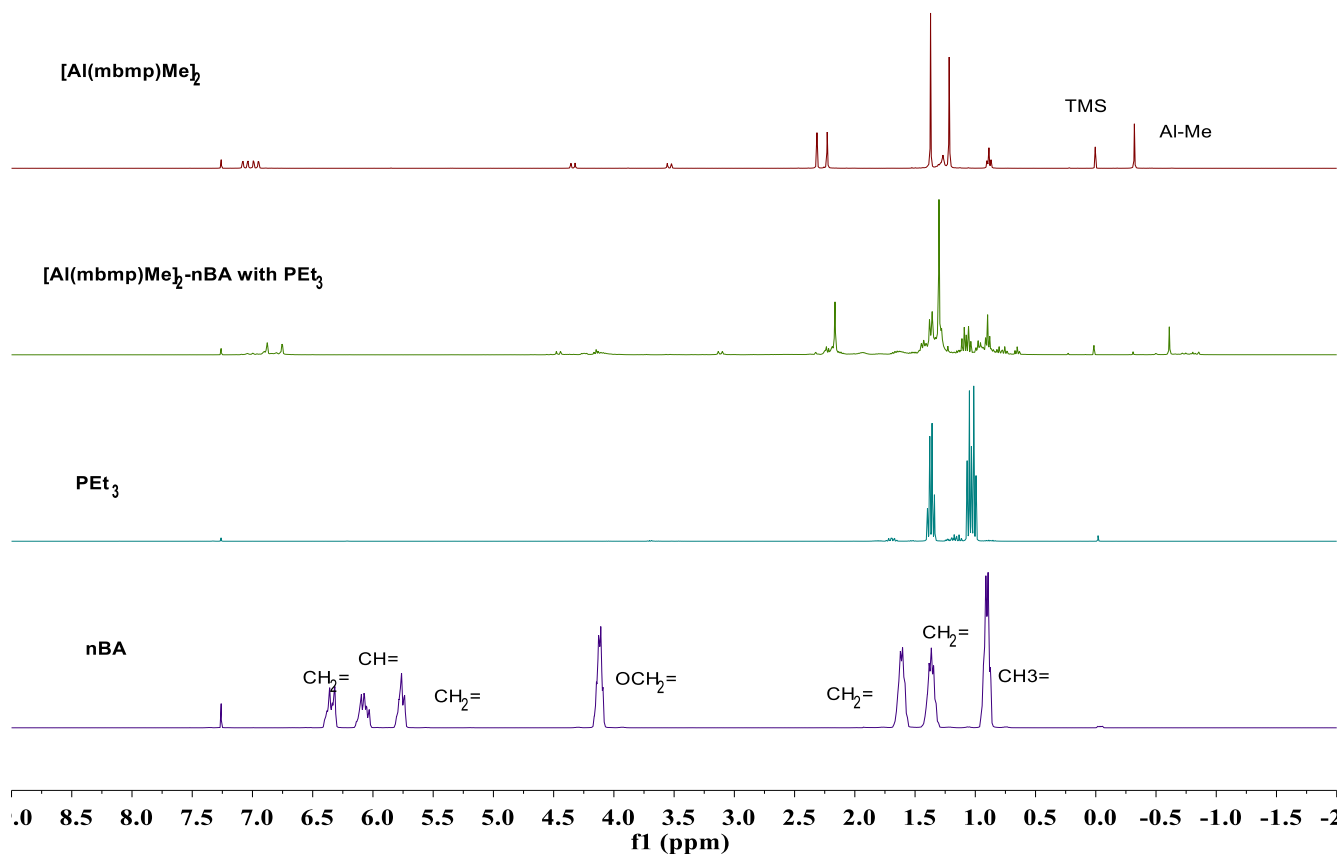

**Figure S26.**  $^1\text{H}$  NMR spectra for reaction of  $\text{PEt}_3$  with  $[\text{Al}(\text{mbmp})\text{Me}]_2 \cdot \text{nBA}$  (400 MHz,  $\text{CDCl}_3$ , 298 K)

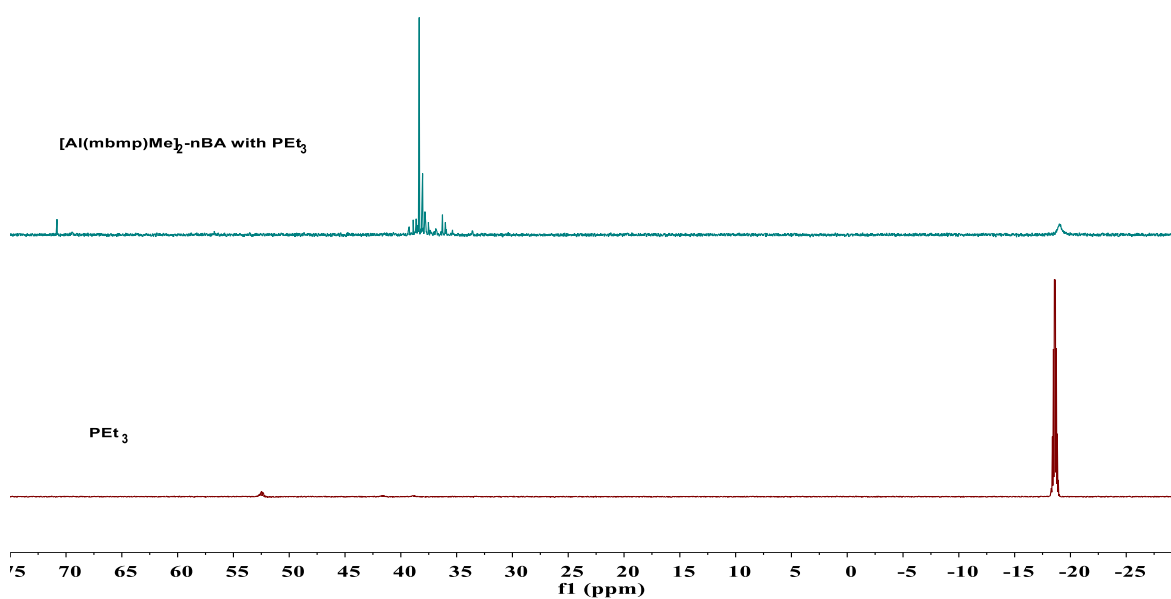

**Figure S27.**  $^{31}\text{P}$  { $^1\text{H}$ } (162 MHz,  $\text{CDCl}_3$ , 298 K) spectra for reaction of  $\text{PEt}_3$  with  $[\text{Al}(\text{mbmp})\text{Me}]_2 \cdot \text{nBA}$   
**NMR Reaction of phosphines with  $\text{MeAl}(\text{BHT})_2 \cdot \text{MMA}$  or  $\text{nBA}$  in 1:1:1 Ratio**

In the glovebox, a 5 mL glass vial was charged with phosphines (0.043 mmol) and 0.2 mL of  $\text{C}_6\text{D}_6$ , while another vial was added to  $\text{MeAl}(\text{BHT})_2$  (0.043 mmol, 20 mg, 0.3 mL of  $\text{C}_6\text{D}_6$  and MMA or nBA (0.043 mmol). The two vials were mixed via a syringe at ambient temperature. The reaction mixture was sealed and allowed immediately recorded by NMR. Further purification of the sample led to decomposition and reappearance of monomer.

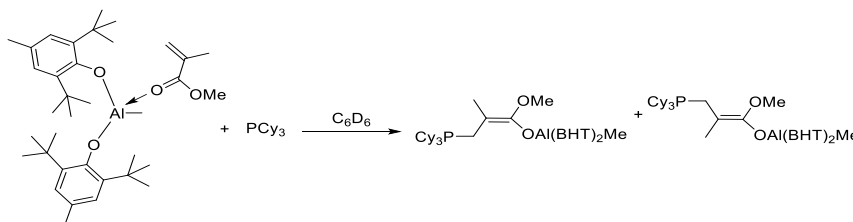

$^1\text{H}$  NMR (400 MHz,  $\text{C}_6\text{D}_6$ , 298 K):  $\delta$ : 7.31 (s, BHT-Ar-H, 4H), 3.47 (s, OMe, 3H), 2.41 (s, BHT-Me, 6H), 2.32 (d,  $^2J_{\text{PH}} = 10.2$  Hz,  $\text{Cy}_2\text{P-CH}_2$ , 2H), 1.88 (s,  $^t\text{Bu}$ , 36H), 1.81 (s, Me, 3H), 0.89-1.66 (m, Cy, 33H), 0.17 (s, Al-Me, 3H).

The molar ratio of major species to the minor species is 1:0.08 based on the  $^{31}\text{P}$  { $^1\text{H}$ } NMR spectrum

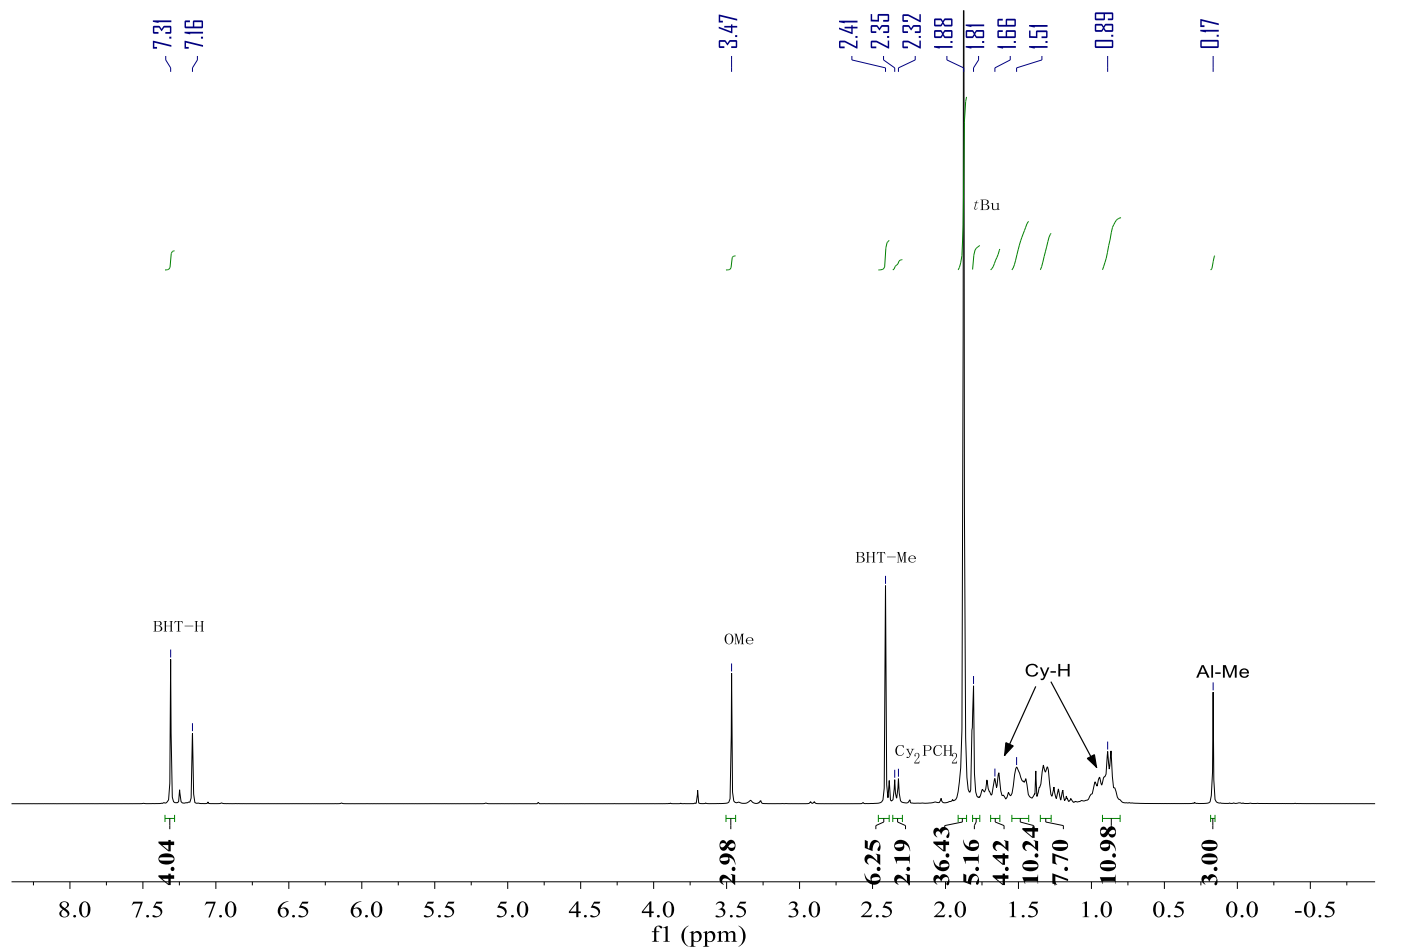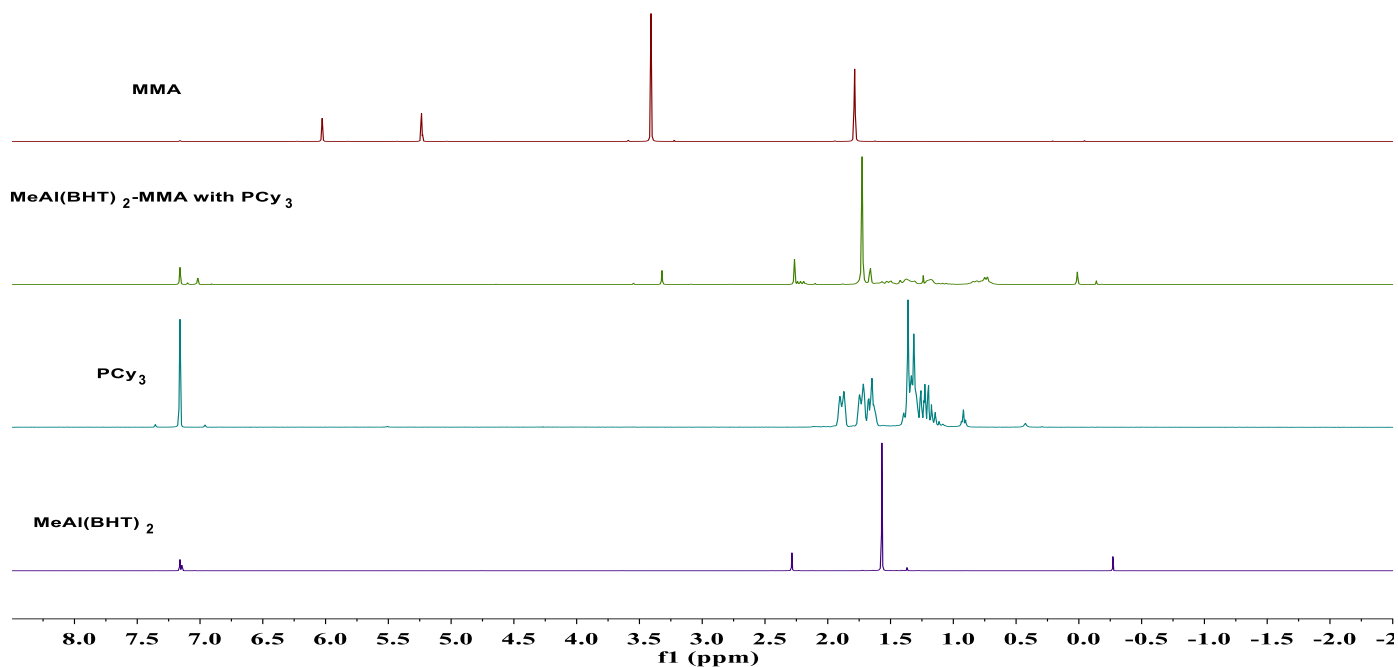

**Figure S28.**  $^1\text{H}$  NMR spectra for reaction of  $\text{MeAl}(\text{BHT})_2\cdot\text{MMA}$  with  $\text{PCy}_3$  (400 MHz,  $\text{C}_6\text{D}_6$ , 298 K), upper: separated spectrum; bottom: stacked spectra

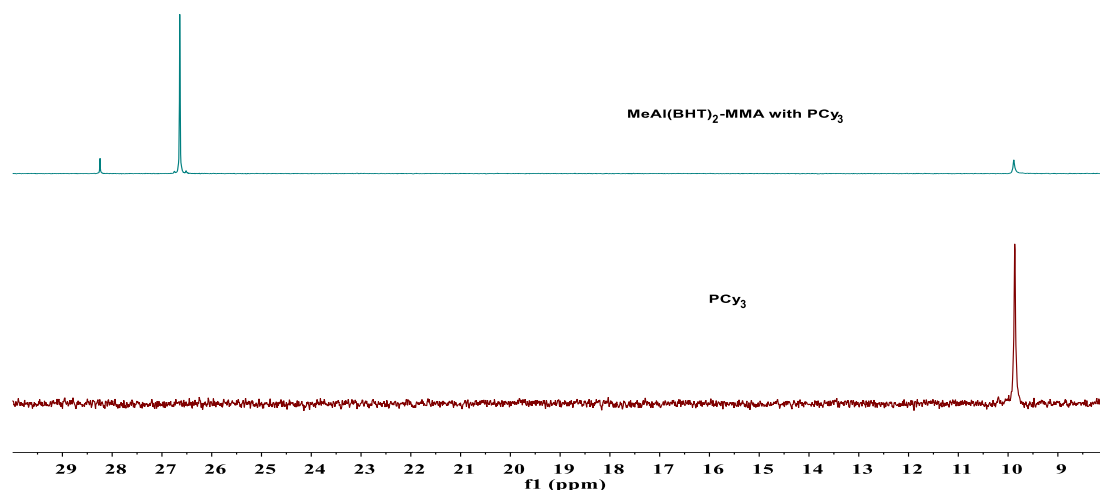

**Figure S29.**  $^{31}\text{P}$   $\{^1\text{H}\}$  (162 MHz,  $\text{C}_6\text{D}_6$ , 298 K) spectra for reaction of  $\text{MeAl}(\text{BHT})_2\cdot\text{MMA}$  with  $\text{PCy}_3$

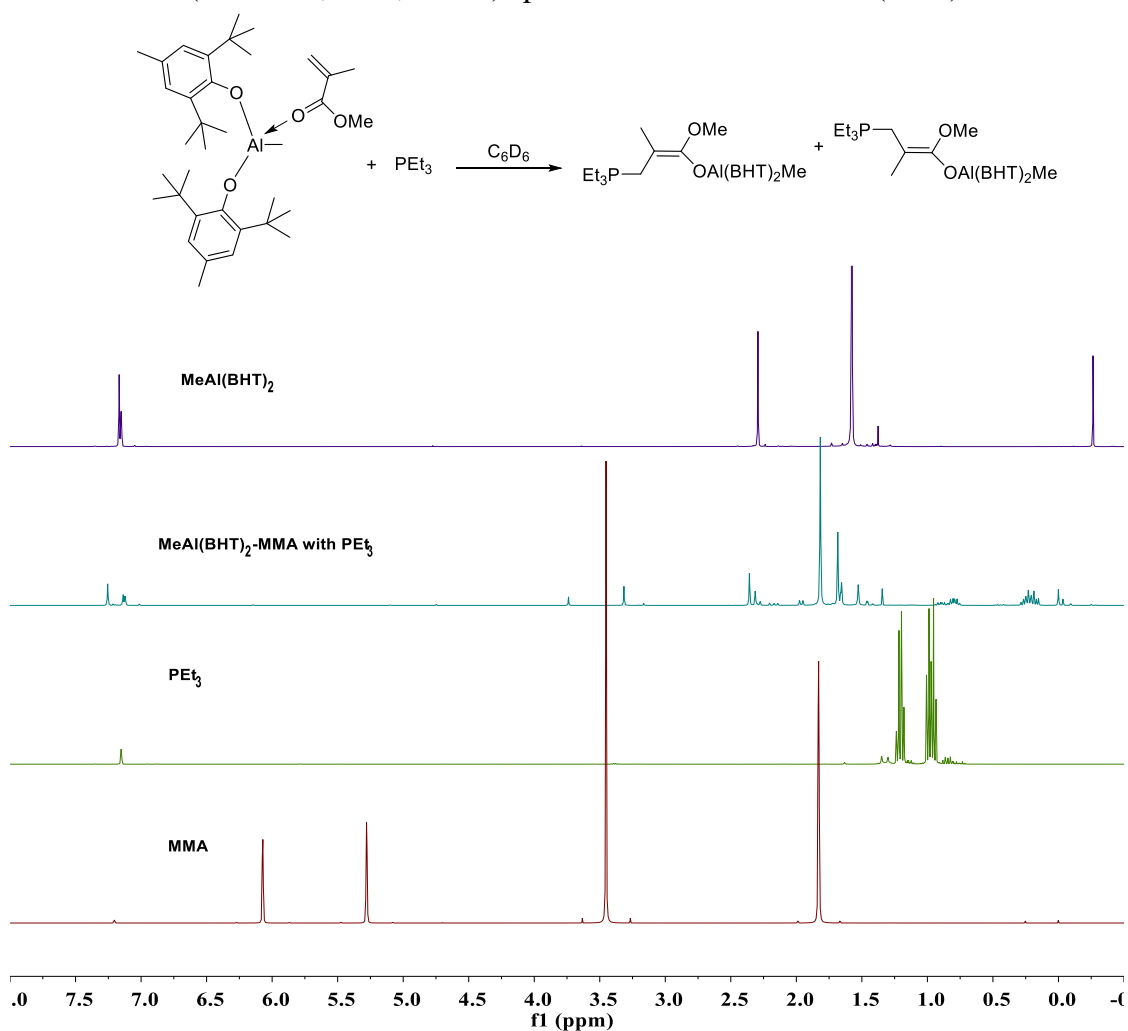

**Figure S30.**  $^1\text{H}$  NMR spectra for reaction of  $\text{MeAl}(\text{BHT})_2\cdot\text{MMA}$  with  $\text{PEt}_3$  (400 MHz,  $\text{C}_6\text{D}_6$ , 298 K)

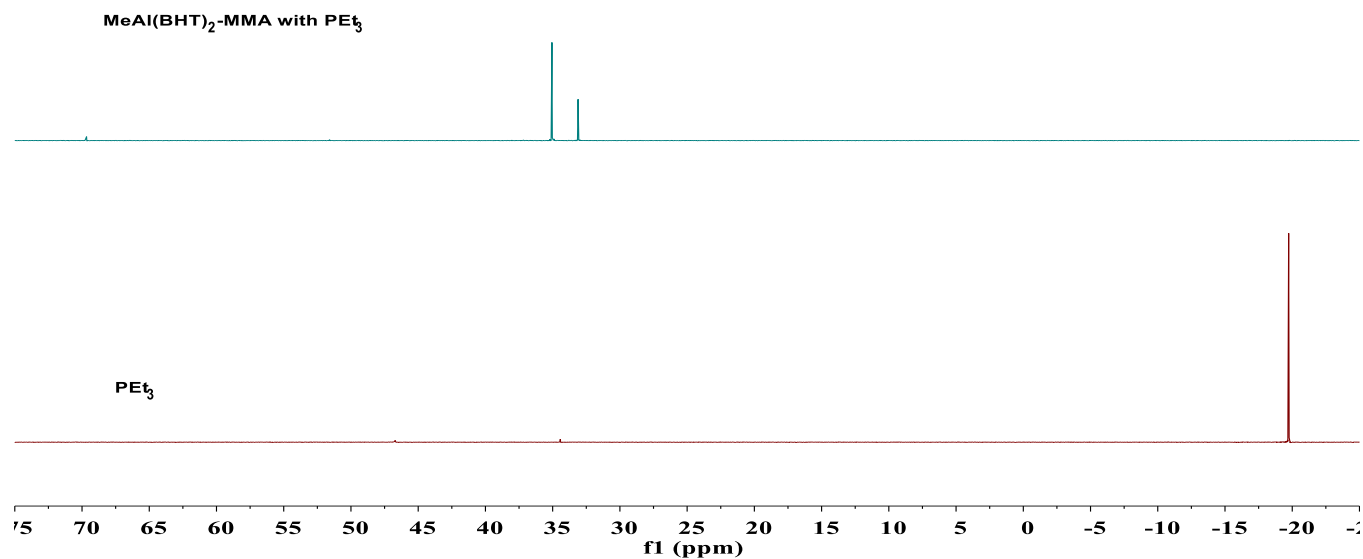

**Figure S31.**  $^{31}\text{P}$  { $^1\text{H}$ } (162 MHz,  $\text{C}_6\text{D}_6$ , 298 K) spectra for reaction of  $\text{MeAl}(\text{BHT})_2\cdot\text{MMA}$  with  $\text{PEt}_3$

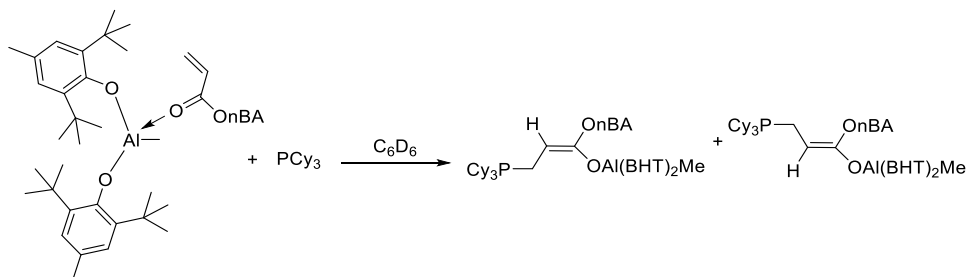

The molar ratio of major species to the minor species is 1:0.17 based on the  $^1\text{H}$  NMR and  $^{31}\text{P}$  { $^1\text{H}$ } NMR spectra

Tentative assignment of the major species :  $^1\text{H}$  NMR (400 MHz,  $\text{C}_6\text{D}_6$ , 298 K):  $\delta$ : 7.29 (s, BHT-Ar-H, 4H), 4.25 (t,  $^3J_{\text{HH}} = 6.9$  Hz,  $\text{OCH}_2$ , 2H), 2.52 (d,  $^2J_{\text{PH}} = 10.2$  Hz,  $\text{Cy}_2\text{P-CH}_2$ , 2H), 2.38 (s, BHT-Me, 6H), 1.87 (s,  $^t\text{Bu}$ , 36H), 0.89-1.81 (m, Cy and Me, 36H), 0.09 (s, Al-Me, 3H).

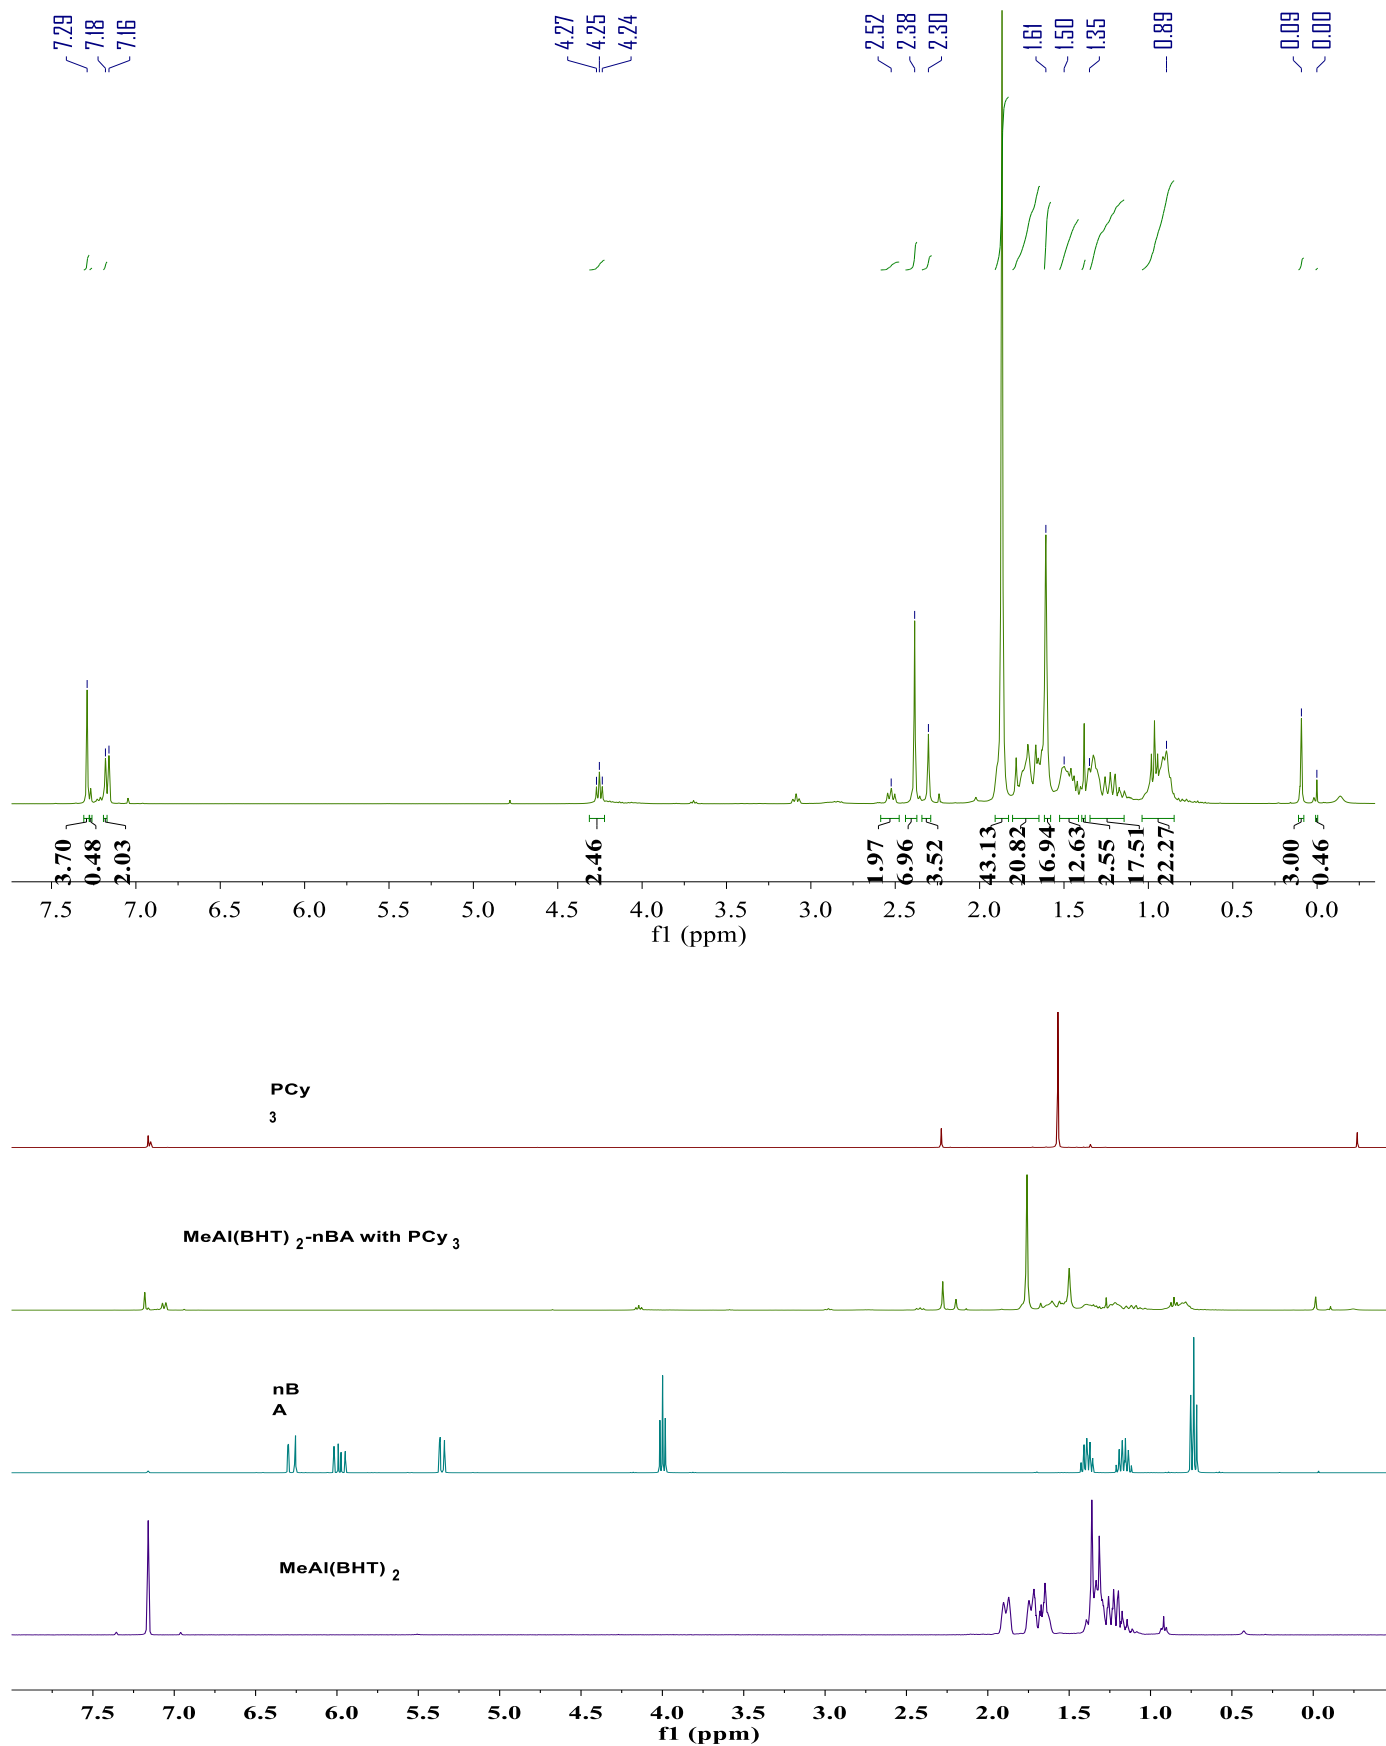

**Figure S32.**  $^1\text{H}$  NMR spectra for reaction of  $\text{MeAl}(\text{BHT})_2 \cdot \text{nBA}$  with  $\text{PCy}_3$  (400 MHz,  $\text{C}_6\text{D}_6$ , 298 K) upper: separated spectrum; bottom: stacked spectra



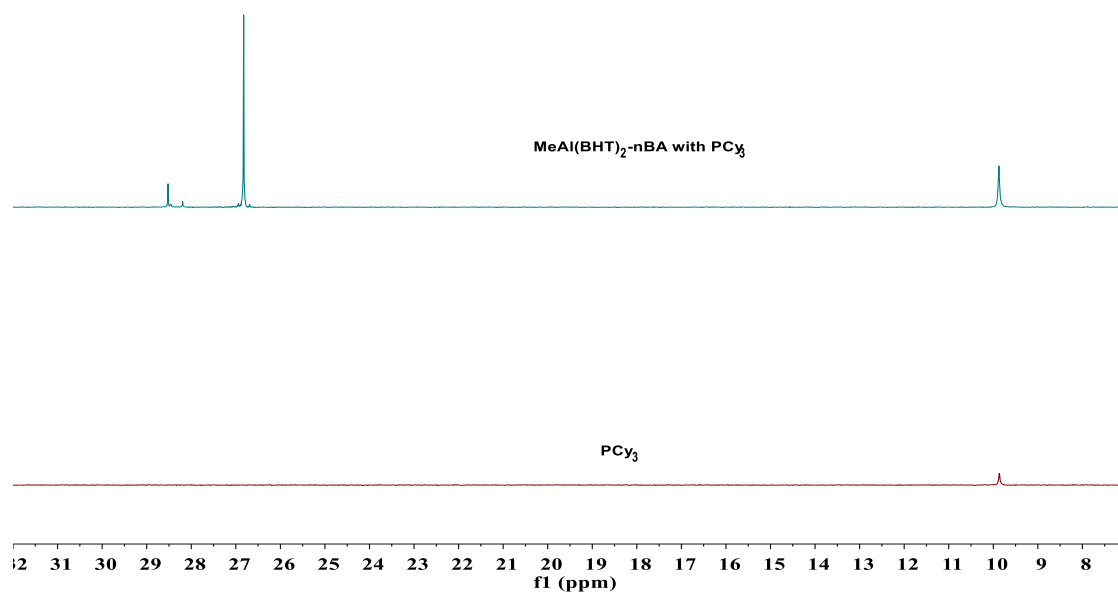

**Figure S33.**  $^{31}\text{P}$  { $^1\text{H}$ } (162 MHz,  $\text{C}_6\text{D}_6$ , 298 K) spectra for reaction of  $\text{MeAl}(\text{BHT})_2\cdot\text{nBA}$  with  $\text{PCy}_3$

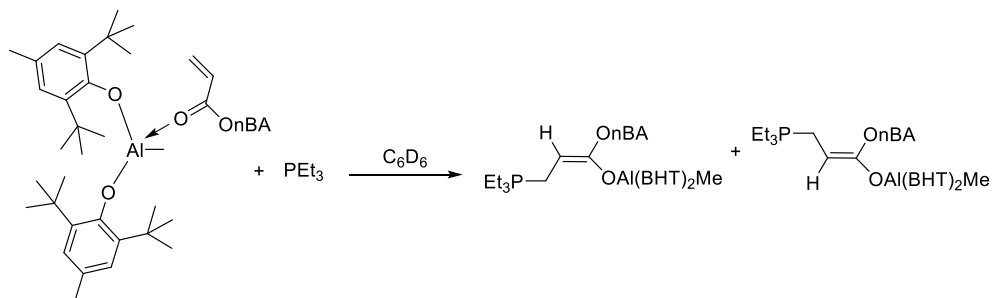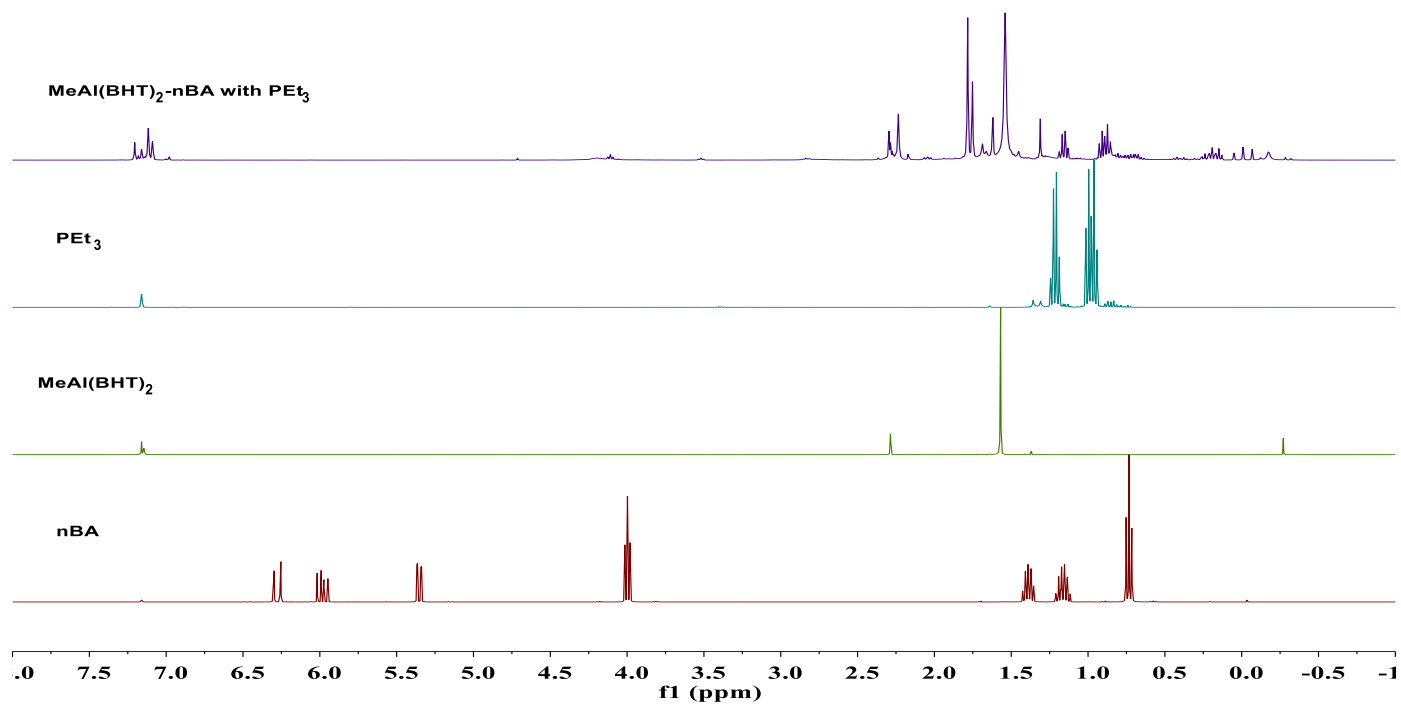

**Figure S34.**  $^1\text{H}$  NMR spectra for reaction of  $\text{MeAl}(\text{BHT})_2\cdot\text{nBA}$  with  $\text{PEt}_3$  (400 MHz,  $\text{C}_6\text{D}_6$ , 298 K)

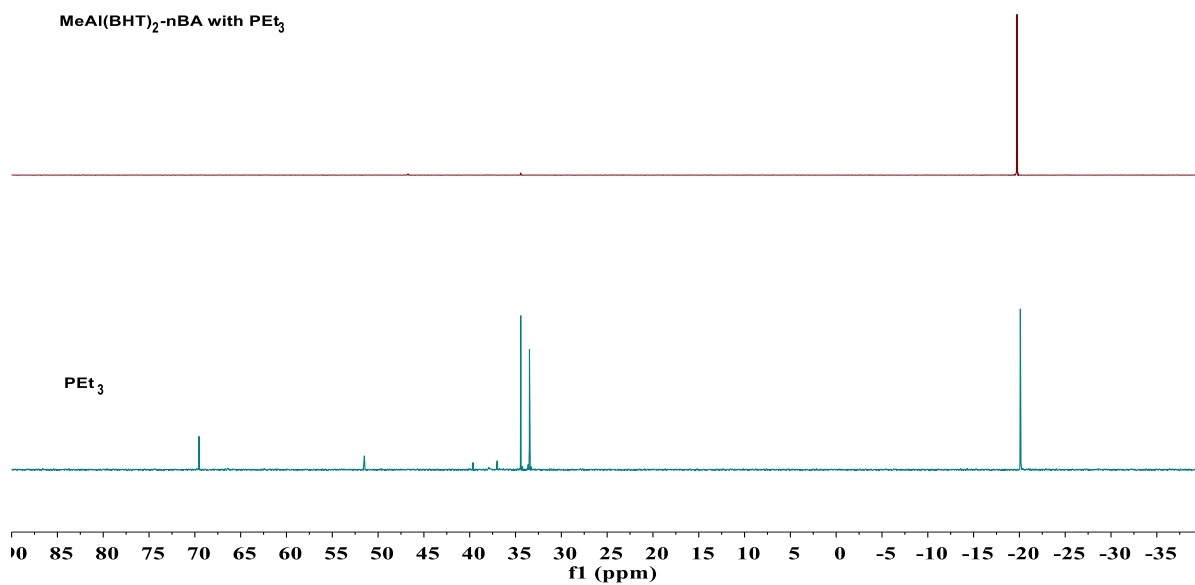

**Figure S35.**  $^{31}\text{P}$  { $^1\text{H}$ } (162 MHz,  $\text{C}_6\text{D}_6$ , 298 K) spectra for reaction of  $\text{MeAl}(\text{BHT})_2 \cdot \text{nBA}$  with  $\text{PEt}_3$

Oct08-2018wxx-2018-09-26-toluene.1.fid

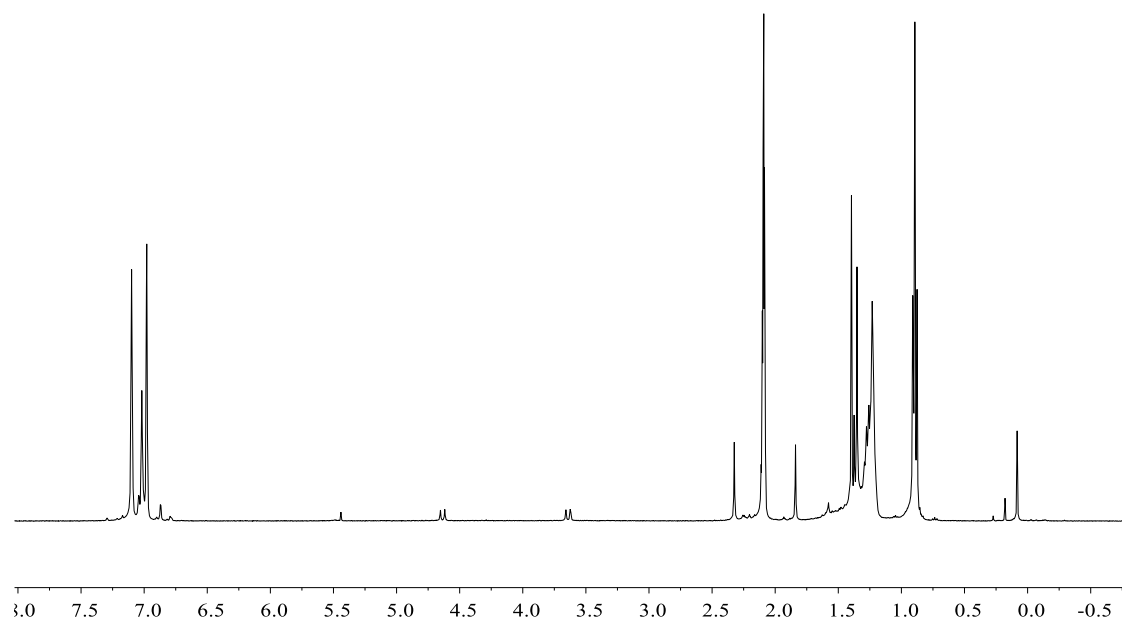

**Figure S36.**  $^1\text{H}$  NMR spectrum of  $[\text{Al}(\text{mbmp})\text{Me}]_2$  in  $\text{toluene-d}_8$  (400 MHz,  $\text{toluene-d}_8$ , 298 K)

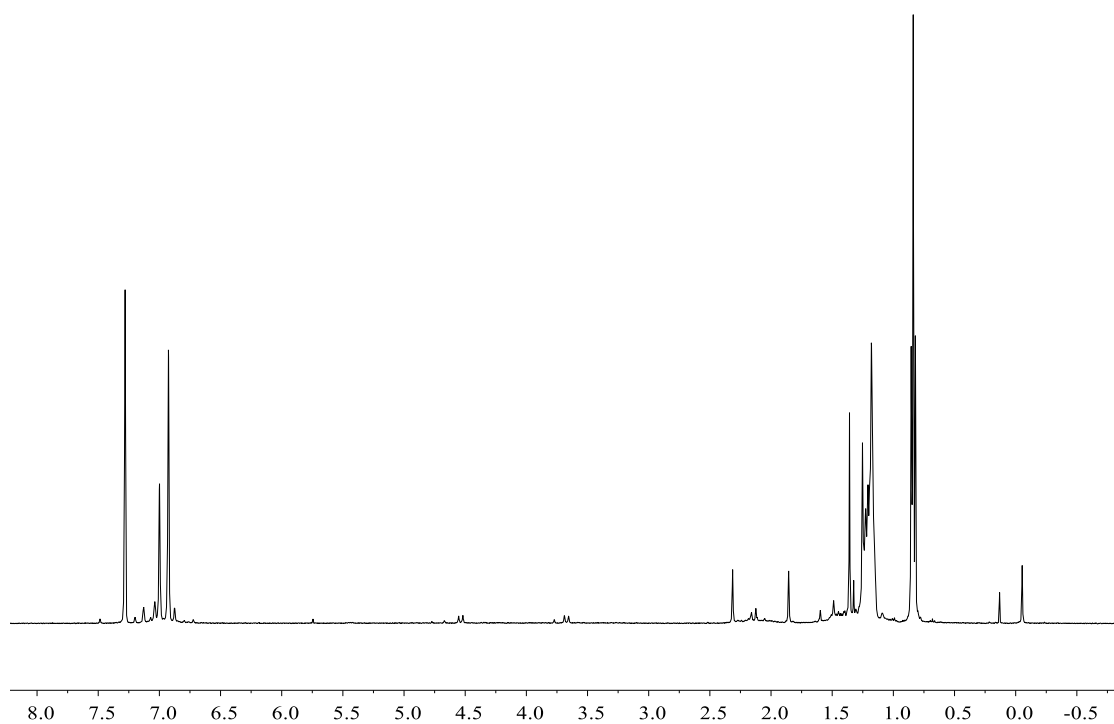

**Figure S37.**  $^1\text{H}$  NMR Spectrum of  $[\text{Al}(\text{mbmp})\text{Me}]_2$  in  $\text{C}_6\text{D}_5\text{Br}$  (400 MHz,  $\text{C}_6\text{D}_5\text{Br}$ , 298 K)

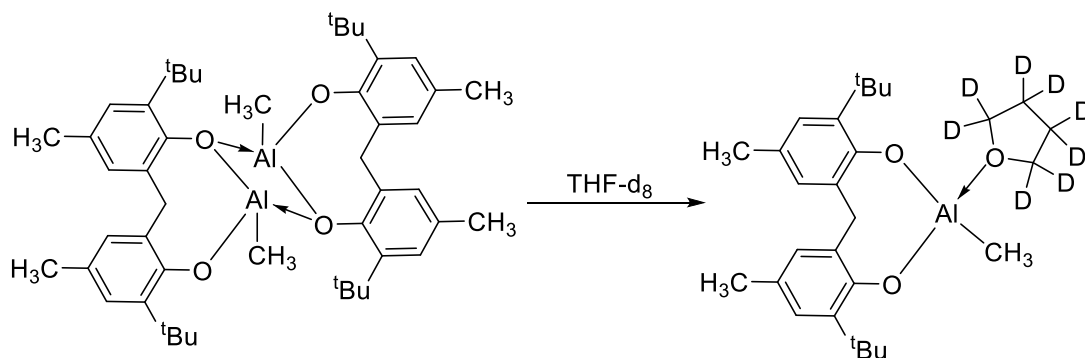

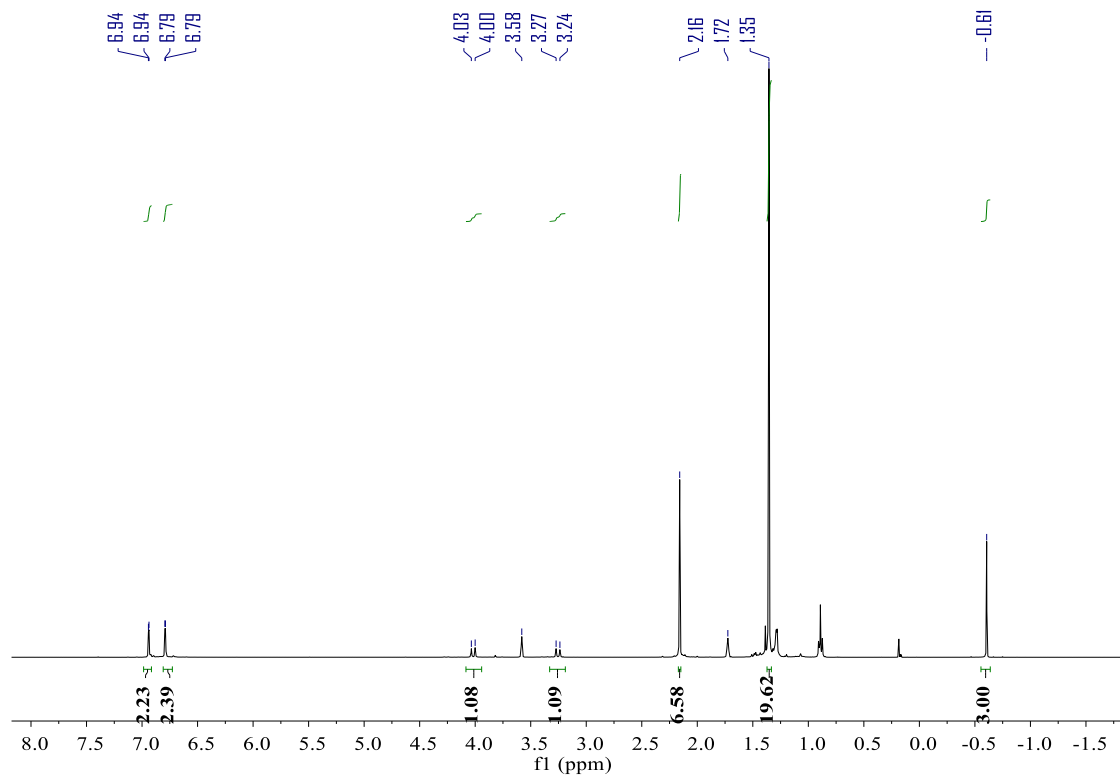

**Figure S38.**  $^1\text{H}$  NMR spectrum of  $[\text{Al}(\text{mbmp})\text{Me}]_2$  in  $\text{THF-d}_8$  (400 MHz,  $\text{THF-d}_8$ , 298 K)

**$^1\text{H}$  NMR of PnBA obtained by  $\text{MeAl}(\text{BHT})_2/\text{P}[2,4,6-(\text{MeO})\text{C}_6\text{H}_2]_3$**

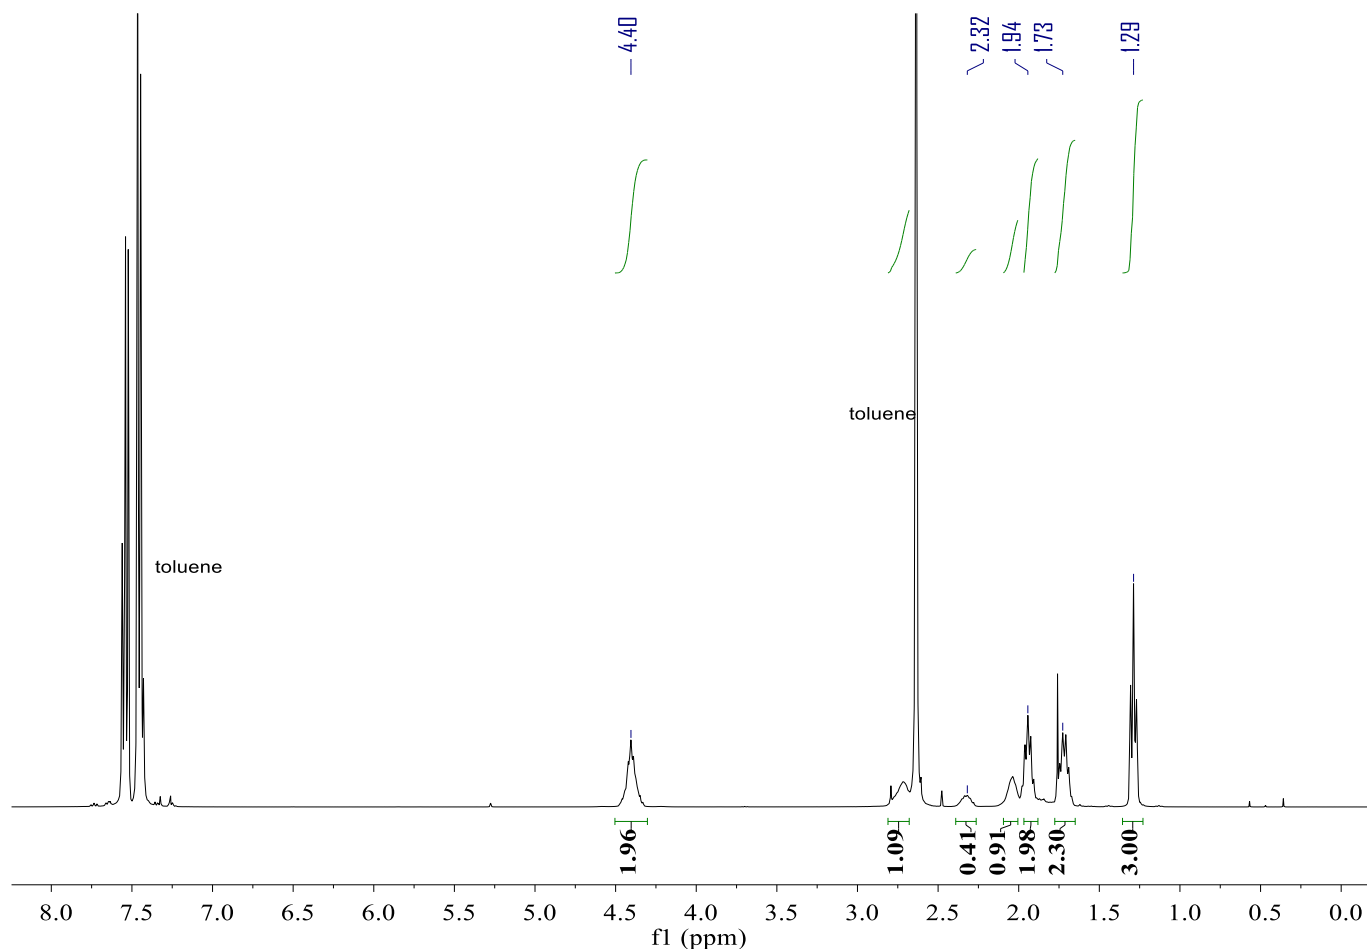

**Figure S39.**  $^1\text{H}$  NMR spectrum of PnBA (400 MHz,  $\text{CDCl}_3$ , 298 K)

### Acidity of Different Lewis Acids Measured through Gutmann–Beckett Method<sup>[3]</sup>

The relative Lewis acidities were determined by dividing the change in chemical shift of the triethylphosphine oxide resonance upon binding to the electron-deficient aluminum catalyst relative to  $\text{Al}(\text{C}_6\text{F}_5)_3$ , similar to determining the Lewis Acidity of electron-deficient boron catalyst relative to  $\text{B}(\text{C}_6\text{F}_5)_3$  by the Gutmann–Beckett method<sup>2</sup>. In a glove box, aluminum catalyst (0.012 mmol) was added to a 0.5 mL  $\text{CDCl}_3$  solution of  $\text{Et}_3\text{PO}$  (0.012 mmol/0.5 mL, 0.05 M) in a 2 mL NMR tube. The reaction mixture was monitored by  $^{31}\text{P}\{^1\text{H}\}$  NMR spectroscopy after 30 min at room temperature. The  $^{31}\text{P}\{^1\text{H}\}$  chemical shift of  $\text{Et}_3\text{PO}$  in  $\text{CDCl}_3$  is 52.5 ppm.

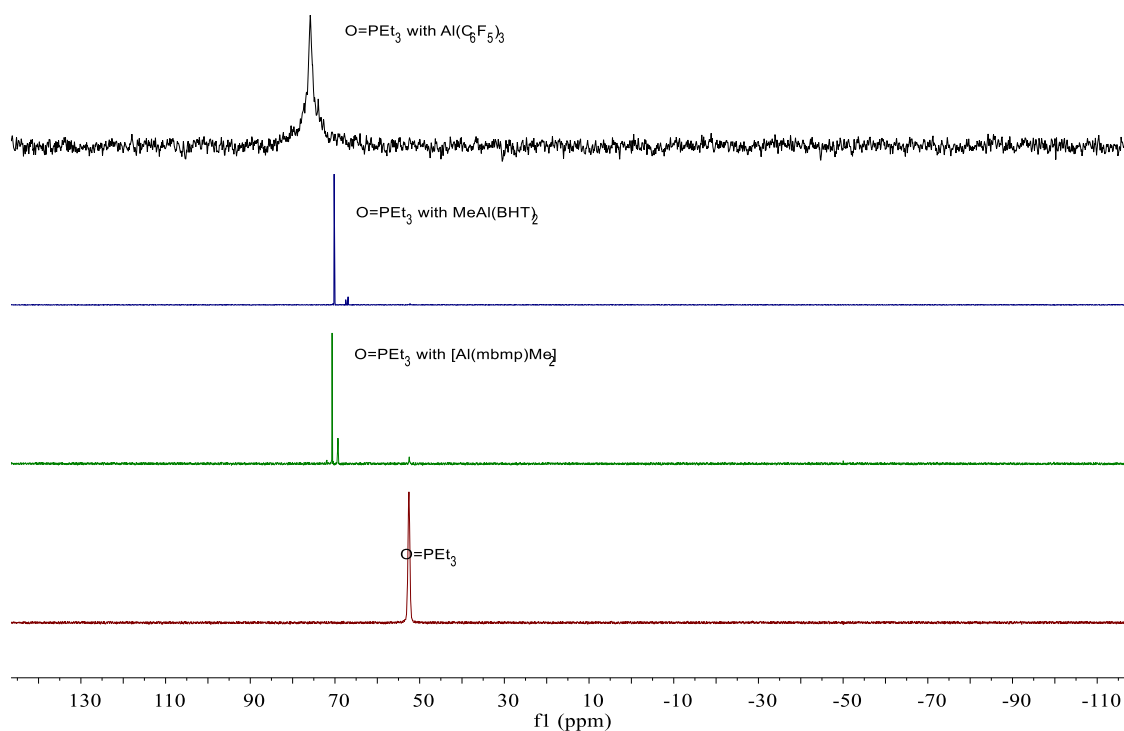

Figure S40.  $^{31}\text{P}\{^1\text{H}\}$  NMR (162 MHz,  $\text{CDCl}_3$ , 298 K)

Table S1 Acidity of Different Lewis Acids Measured through Gutmann–Beckett Method

| Aluminum Catalyst                     | $^{31}\text{P}\{^1\text{H}\}$ NMR<br>( $\delta/\text{ppm}$ ) | $\Delta\delta$ values relative to<br>free $\text{Et}_3\text{PO}$ ( $\delta/\text{ppm}$ ) | Relative Lewis<br>Acidity (%) |
|---------------------------------------|--------------------------------------------------------------|------------------------------------------------------------------------------------------|-------------------------------|
| $\text{Al}(\text{C}_6\text{F}_5)_3$   | 75.8                                                         | 23.3                                                                                     | 100                           |
| $\text{MeAl}(\text{BHT})_2$           | 70.2                                                         | 17.7                                                                                     | 76                            |
| $[\text{Al}(\text{mbmp})\text{Me}]_2$ | 70.7                                                         | 18.2                                                                                     | 78                            |

## Polymerization Data

Table S2 Only Lewis acid and Lewis base effect in MMA polymerization

| Run <sup>a</sup> | Acid : base : monomer                                         | Conv. <sup>b</sup> (%) | $M_n^c(\text{kg}\cdot\text{mol}^{-1})$ | $\text{Đ} (M_w/M_n)$ | $I^{*d}$ (%) |
|------------------|---------------------------------------------------------------|------------------------|----------------------------------------|----------------------|--------------|
| 1                | $\text{MeAl}(\text{BHT})_2$ :base:monomer = 2:0:200           | no                     |                                        |                      |              |
| 2                | $[\text{Al}(\text{mbmp})\text{Me}]_2$ :base:monomer = 1:0:200 | no                     |                                        |                      |              |
| 3                | $t\text{BuAl}(\text{BHT})_2$ :base:monomer = 1:0:200          | no                     |                                        |                      |              |

|                 | <sup>i</sup> Bu <sub>2</sub> Al(BHT):base:monomer = 1:0:200 |    |
|-----------------|-------------------------------------------------------------|----|
| 4               |                                                             | no |
| 5 <sup>e</sup>  | 0:1:200                                                     | no |
| 6 <sup>f</sup>  | 0:1:200                                                     | no |
| 7 <sup>g</sup>  | 0:1:200                                                     | no |
| 8 <sup>h</sup>  | 0:1:200                                                     | no |
| 9 <sup>i</sup>  | 0:1:200                                                     | no |
| 10 <sup>j</sup> | 0:1:200                                                     | no |

<sup>a</sup>Condition: The polymerization was carried out at RT for 2 h in 2 mL of toluene using the following procedure: for a 200 MMA/1 LB/1 LA ratio, [MMA]<sub>0</sub> = 1.92 M (4.8 mmol) and [LA]<sub>0</sub> = [LB]<sub>0</sub> = 9.6 mM (0.024 mmol). n.d.: not determined. <sup>b</sup>Monomer conversions measured by <sup>1</sup>H NMR spectra. <sup>c</sup>M<sub>n</sub> and Đ determined by GPC relative to PS standards in THF. <sup>d</sup>Initiation efficiency (I\*)% = M<sub>n</sub>(calcd)/M<sub>n</sub>(exptl) × 100, where M<sub>n</sub>(calcd) = [M<sub>w</sub>(MMA)]([MMA]<sub>0</sub>/[I]<sub>0</sub>)(conversion) + M<sub>w</sub> of chain end groups. <sup>e</sup> base P(Ph)<sub>3</sub>(OMe); <sup>f</sup> base PCy<sub>3</sub>; <sup>g</sup> base PEt<sub>3</sub>; <sup>h</sup> base P(4-OCH<sub>3</sub>C<sub>6</sub>H<sub>5</sub>)<sub>3</sub>; <sup>i</sup> base P(4-CH<sub>3</sub>C<sub>6</sub>H<sub>5</sub>)<sub>3</sub>; <sup>j</sup> base PPh<sub>3</sub>.

**Table S3 Solvent and LA:LB ratio effect on [Al(mbmp)Me]<sub>2</sub>/PPh<sub>3</sub> in MMA polymerization**

| Run <sup>a</sup> | Solvent                         | LA:LB:M   | Conv.<br><sup>b</sup> (%) | Selectivity |      |     | M <sub>n</sub> <sup>c</sup><br>(kg·mol <sup>-1</sup> ) | M <sub>n</sub> (calcd)<br>(kg·mol <sup>-1</sup> ) | Đ<br>(M <sub>w</sub> /M <sub>n</sub> ) | I* <sup>d</sup><br>(%) |
|------------------|---------------------------------|-----------|---------------------------|-------------|------|-----|--------------------------------------------------------|---------------------------------------------------|----------------------------------------|------------------------|
|                  |                                 |           |                           | rr          | mr   | mm  |                                                        |                                                   |                                        |                        |
| 1                | CH <sub>2</sub> Cl <sub>2</sub> | 1:1:200   | >99                       | 66.2        | 31.1 | 2.7 | 2100                                                   | 20286                                             | 7.0                                    | 980                    |
| 2                | toluene                         | 1:1:200   | >99                       | 65.8        | 29.6 | 4.6 | 20300                                                  | 20286                                             | 4.7                                    | 100                    |
| 3                | no                              | 1:1:200   | 95                        | -           | -    | -   | n.d.                                                   | 20286                                             | n.d.                                   |                        |
| 4                | toluene                         | 2:1:200   | >99                       | 67.5        | 30.4 | 2.1 | 2100                                                   | 20286                                             | 15.6                                   | 973                    |
| 5 <sup>e</sup>   | toluene                         | 0.5:1:200 | >99                       | -           | -    | -   | 35800                                                  | 20300                                             | 1.7                                    | 56.7                   |

<sup>a</sup>Condition: The polymerization was carried out at RT for 2 h in 2 mL of solvent using the following procedure: for a 200 MMA/1 LB/1 LA ratio, [MMA]<sub>0</sub> = 1.92 M (4.8 mmol) and [LA]<sub>0</sub> = [LB]<sub>0</sub> = 9.6 mM (0.024 mmol), [LA]<sub>0</sub> = 2[LB]<sub>0</sub> = 19.2 mM (0.048 mmol, run 4). n.d.: not determined. <sup>b</sup>Monomer conversions measured by <sup>1</sup>H NMR. <sup>c</sup>M<sub>n</sub> and Đ determined by GPC relative to PMMA standards in THF. <sup>d</sup>Initiation efficiency (I\*)% = M<sub>n</sub>(calcd)/M<sub>n</sub>(exptl) × 100, where M<sub>n</sub>(calcd) = [M<sub>w</sub>(MMA)]([MMA]<sub>0</sub>/[I]<sub>0</sub>)(conversion) + M<sub>w</sub> of chain end groups. <sup>e</sup> using PCy<sub>3</sub> instead of PPh<sub>3</sub> as Lewis base, reaction time, 5 min.

**Table S4 MMA polymerization catalyzed by different phosphines/organoaluminum**

| Run <sup>a</sup> | LP | Conv. <sup>b</sup><br>(%) | Selectivity |    |    | M <sub>n</sub> <sup>c</sup><br>(g·mol <sup>-1</sup> ) | M <sub>n</sub> (calcd)<br>(g·mol <sup>-1</sup> ) | Đ<br>(M <sub>w</sub> /M <sub>n</sub> ) | I* <sup>d</sup><br>(%) |
|------------------|----|---------------------------|-------------|----|----|-------------------------------------------------------|--------------------------------------------------|----------------------------------------|------------------------|
|                  |    |                           | rr          | mr | mm |                                                       |                                                  |                                        |                        |

|    |                                                                                                             |     |      |      |     |        |       |     |      |
|----|-------------------------------------------------------------------------------------------------------------|-----|------|------|-----|--------|-------|-----|------|
| 1  | PCy <sub>3</sub> / MeAl(BHT) <sub>2</sub>                                                                   | >99 | 70   | 26.9 | 4.1 | 40400  | 20304 | 2.5 | 50.3 |
| 2  | PEt <sub>3</sub> / MeAl(BHT) <sub>2</sub>                                                                   | >99 | 71.5 | 24.4 | 2.1 | 8500   | 20142 | 1.3 | 29.4 |
| 3  | P (4-OCH <sub>3</sub> C <sub>6</sub> H <sub>5</sub> ) <sub>3</sub> /<br>MeAl(BHT) <sub>2</sub>              | >99 | 71.9 | 25.9 | 2.2 | 102000 | 20376 | 2.2 | 20   |
| 4  | P(4-CH <sub>3</sub> C <sub>6</sub> H <sub>5</sub> ) <sub>3</sub> /<br>MeAl(BHT) <sub>2</sub>                | no  |      |      |     |        |       |     |      |
| 5  | PPh <sub>3</sub> / MeAl(BHT) <sub>2</sub>                                                                   | no  |      |      |     |        |       |     |      |
| 6  | PCy <sub>3</sub> / <sup>i</sup> BuAl(BHT) <sub>2</sub>                                                      | >99 | 78.1 | 18.8 | 3.1 | 76100  | 20304 | 1.3 | 26.7 |
| 7  | PEt <sub>3</sub> / <sup>i</sup> BuAl(BHT) <sub>2</sub>                                                      | >99 | 80   | 19.2 | 0.8 | 103000 | 20142 | 1.6 | 19.6 |
| 8  | P (4-OCH <sub>3</sub> C <sub>6</sub> H <sub>5</sub> ) <sub>3</sub> /<br><sup>i</sup> BuAl(BHT) <sub>2</sub> | no  |      |      |     |        |       |     |      |
| 9  | P(4-CH <sub>3</sub> C <sub>6</sub> H <sub>5</sub> ) <sub>3</sub> /<br><sup>i</sup> BuAl(BHT) <sub>2</sub>   | no  |      |      |     |        |       |     |      |
| 10 | PPh <sub>3</sub> / <sup>i</sup> BuAl(BHT) <sub>2</sub>                                                      | no  |      |      |     |        |       |     |      |
| 11 | PCy <sub>3</sub> / <sup>i</sup> Bu <sub>2</sub> AlBHT                                                       | 42  | 65.4 | 27.5 | 7.1 | 93000  | 20304 | 1.5 | 21.8 |
| 12 | PEt <sub>3</sub> / <sup>i</sup> Bu <sub>2</sub> AlBHT                                                       | no  |      |      |     |        |       |     |      |
| 13 | P (4-OCH <sub>3</sub> C <sub>6</sub> H <sub>5</sub> ) <sub>3</sub> /<br><sup>i</sup> Bu <sub>2</sub> AlBHT  | no  |      |      |     |        |       |     |      |
| 14 | P(4-CH <sub>3</sub> C <sub>6</sub> H <sub>5</sub> ) <sub>3</sub> /<br><sup>i</sup> Bu <sub>2</sub> AlBHT    | no  |      |      |     |        |       |     |      |
| 15 | PPh <sub>3</sub> / <sup>i</sup> Bu <sub>2</sub> AlBHT                                                       | no  |      |      |     |        |       |     |      |

<sup>a</sup>Condition: The polymerization was carried out at RT for 2 h in 2 mL of toluene using the following procedure: for a 200 MMA/1 LB/1 LA ratio, [MMA]<sub>0</sub> = 1.92 M (4.8 mmol) and [LA]<sub>0</sub> = 2[LB]<sub>0</sub> = 19.2 mM (0.048 mmol). n.d.: not determined. <sup>b</sup>Monomer conversions measured by <sup>1</sup>H NMR. <sup>c</sup>M<sub>n</sub> and Đ determined by GPC relative to PMMA standards in THF. <sup>d</sup>Initiation efficiency (I\*)% = M<sub>n</sub>(calcd)/M<sub>n</sub>(exptl) × 100, where M<sub>n</sub>(calcd) = [M<sub>w</sub>(MMA)]/[MMA]<sub>0</sub>/[I]<sub>0</sub>(conversion) + M<sub>w</sub> of chain end groups.

**Table S5 MMA polymerization catalyzed by different NHOs/[Al(mbmp)Me]<sub>2</sub>**

| Run <sup>a</sup> | LP   | Conv. <sup>b</sup><br>(%) | Selectivity |      |     | M <sub>n</sub> <sup>c</sup><br>(g·mol <sup>-1</sup> ) | Đ<br>(M <sub>w</sub> /M <sub>n</sub> ) |
|------------------|------|---------------------------|-------------|------|-----|-------------------------------------------------------|----------------------------------------|
|                  |      |                           | rr          | mr   | mm  |                                                       |                                        |
| 1                | NHO- | >99                       | 65.3        | 33.1 | 1.6 | 58100                                                 | 1.2                                    |



|                | 1/[Al(mbmp)Me] <sub>2</sub>         |     |      |      |     |       |     |
|----------------|-------------------------------------|-----|------|------|-----|-------|-----|
| 2              | NHO-2/<br>[Al(mbmp)Me] <sub>2</sub> | >99 | 64.5 | 32.9 | 2.6 | 65700 | 1.2 |
| 3              | NHO-1/MeAl(BHT) <sub>2</sub>        | >99 | 66.7 | 30.7 | 2.7 | 33900 | 1.2 |
| 4              | NHO-2/MeAl(BHT) <sub>2</sub>        | >99 | 67.1 | 30.2 | 2.7 | 27500 | 1.5 |
| 5 <sup>d</sup> | NHO-1/MeAl(BHT) <sub>2</sub>        | >99 | 67.1 | 30.6 | 2.3 | 27900 | 1.1 |
| 6 <sup>d</sup> | NHO-2/MeAl(BHT) <sub>2</sub>        | >99 | 66.6 | 31.3 | 2.1 | 30400 | 1.1 |
| 7 <sup>e</sup> | IAP-3/[Al(mbmp)Me] <sub>2</sub>     | >99 | 65.2 | 32.5 | 2.3 | 11127 | 1.3 |

<sup>a</sup>Condition: The polymerization was carried out at RT for 2 min in 2 mL of toluene using the following procedure: for a 200 MMA/1 LB/1 LA ratio, [MMA]<sub>0</sub> = 1.92 M (4.8 mmol) and [LA]<sub>0</sub> = 2[LB]<sub>0</sub> = 19.2 mM (0.048 mmol). n.d.: not determined. <sup>b</sup>Monomer conversions measured by <sup>1</sup>H NMR. <sup>c</sup>M<sub>n</sub> and Đ determined by GPC relative to PMMA standards in THF. <sup>d</sup>Data obtained from reference *ACS Catalysis*, **2018**, *8*, 3571-3578.

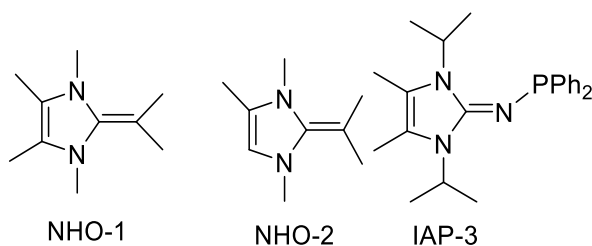

**Table S6 MMA polymerization catalyzed by different phosphines/[Al(mbmp)Me]<sub>2</sub> in a molar ratio of 1:0.5**

| Run <sup>a</sup> | LP                                                                                           | Conv. <sup>b</sup><br>(%) | Selectivity |      |     | M <sub>n</sub> <sup>c</sup><br>(g·mol <sup>-1</sup> ) | Đ (M <sub>w</sub> /M <sub>n</sub> ) |
|------------------|----------------------------------------------------------------------------------------------|---------------------------|-------------|------|-----|-------------------------------------------------------|-------------------------------------|
|                  |                                                                                              |                           | rr          | mr   | mm  |                                                       |                                     |
| 1                | P(Ph) <sub>3</sub> (OMe) <sub>9</sub> /[Al(mbmp)Me] <sub>2</sub>                             | 46.3                      | 65.0        | 33.1 | 1.9 | 7700                                                  | 1.5                                 |
| 2                | PCy <sub>3</sub> /[Al(mbmp)Me] <sub>2</sub>                                                  | >99                       | 64.8        | 32.9 | 2.3 | 51000                                                 | 1.4                                 |
| 3                | PEt <sub>3</sub> /[Al(mbmp)Me] <sub>2</sub>                                                  | 93.7                      | 66.5        | 30.7 | 2.9 | 35100                                                 | 1.7                                 |
| 4                | P(4-OCH <sub>3</sub> C <sub>6</sub> H <sub>5</sub> ) <sub>3</sub> /[Al(mbmp)Me] <sub>2</sub> | 90.6                      | 67.4        | 30.2 | 2.4 | 28580                                                 | 1.5                                 |
| 5                | P(4-CH <sub>3</sub> C <sub>6</sub> H <sub>5</sub> ) <sub>3</sub> /[Al(mbmp)Me] <sub>2</sub>  | no                        | -           | -    | -   | -                                                     | -                                   |
| 6                | PPh <sub>3</sub> /[Al(mbmp)Me] <sub>2</sub>                                                  | 96.5                      | 67.4        | 30.6 | 2.0 | 87600                                                 | 2.7                                 |

<sup>a</sup>Condition: The polymerization was carried out at RT for 2 min in 2 mL of toluene using the following procedure: for a 200 MMA/1 LB/0.5 LA ratio, [MMA]<sub>0</sub> = 1.92 M (4.8 mmol) and [LA]<sub>0</sub> = 0.5[LB]<sub>0</sub> = 9.6 mM (0.024 mmol).

## X-ray data of [Al(mbmp)OH]<sub>2</sub>

CCDC numbers of binuclear [Al(mbmp)OH]<sub>2</sub> is 1961188. These data can be obtained free of charge from The Cambridge Crystallographic Data Centre via [www.ccdc.cam.ac.uk/data\\_request/cif](http://www.ccdc.cam.ac.uk/data_request/cif).

**Table S7 Crystal data and structure refinement for 1961188.**

|                                   |                                                                                                                         |
|-----------------------------------|-------------------------------------------------------------------------------------------------------------------------|
| Identification Code               | 1961188                                                                                                                 |
| Empirical formula                 | C <sub>46</sub> H <sub>62</sub> Al <sub>2</sub> O <sub>6</sub>                                                          |
| Formula weight                    | 764.92                                                                                                                  |
| Temperature                       | 298(2) K                                                                                                                |
| Wavelength                        | 0.71073 Å                                                                                                               |
| Crystal system, space group       | Monoclinic, C2/c                                                                                                        |
| Unit cell dimensions              | a = 16.1738(14) Å    alpha = 90 deg.<br>b = 11.4534(9) Å    beta = 96.754(2) deg.<br>c = 27.691(2) Å    gamma = 90 deg. |
| Volume                            | 5093.9(7) Å <sup>3</sup>                                                                                                |
| Z, Calculated density             | 4, 0.997 Mg/m <sup>3</sup>                                                                                              |
| Absorption coefficient            | 0.096 mm <sup>-1</sup>                                                                                                  |
| F(000)                            | 1648                                                                                                                    |
| Crystal Size                      | 0.43 x 0.33 x 0.30 mm                                                                                                   |
| Theta range for data collection   | 2.54 to 25.02 deg.                                                                                                      |
| Limiting indices                  | -18 ≤ h ≤ 19, 12 ≤ k ≤ 13, -29 ≤ l ≤ 32                                                                                 |
| Reflections collected / unique    | 12396 / 4488 [R(int) = 0.0861]                                                                                          |
| Completeness to theta = 25.02     | 99.7 %                                                                                                                  |
| Absorption correction             | Semi-empirical from equivalents                                                                                         |
| Max. and min. transmission        | 0.9718 and 0.9599                                                                                                       |
| Refinement method                 | Full-matrix least-squares on F <sup>2</sup>                                                                             |
| Data / restraints / parameters    | 4488 / 0 / 253                                                                                                          |
| Goodness-of-fit on F <sup>2</sup> | 1.034                                                                                                                   |

|                                      |                                                      |
|--------------------------------------|------------------------------------------------------|
| Final R indices [ $I > 2\sigma(I)$ ] | R1 = 0.0729, wR2 = 0.2024                            |
| R indices (all data)                 | R1 = 0.1187, wR2 = 0.2252                            |
| Largest diff. peak and hole          | 0.293 and -0.566 e.Å <sup>-3</sup> e.Å <sup>-3</sup> |

**Table S8 Bond lengths [Å] and angles [deg] for 1961188.**

| Atom          | length /Å         |
|---------------|-------------------|
| Al(1)-O(2)    | 1.693(2)          |
| Al(1)-O(1)    | 1.858(2) 1.865(2) |
| Al(1)-O(1)#1  | 1.927(4)          |
| Al(1)-O(3)    | 2.858(2)          |
| Al(1)-Al(1)#1 | 1.422(4)          |
| sO(1)-C(3)    | 1.865(2) 1.364(4) |
| O(1)-Al(1)#1  | 0.8200            |
| O(2)-C(14)    | 1.513(5)          |
| O(3)-H(3)     | 1.525(5)          |
| C(1)-C(13)    | 0.9700            |
| C(1)-C(2)     | 0.9700            |
| C(1)-H(1A)    | 1.374(5)          |
| C(1)-H(1B)    | 1.391(4)          |
| C(2)-C(7)     | 1.412(5)          |
| C(2)-C(3)     | 1.380(5)          |
| C(3)-C(4)     | 1.545(5)          |
| C(4)-C(5)     | 1.391(5)          |
| C(4)-C(8)     | 0.9300            |
| C(5)-C(6)     | 1.380(5)          |
| C(5)-H(5)     | 1.502(6)          |
| C(6)-C(7)     | 0.9300            |
| C(6)-C(12)    | 1.512(6)          |
| C(7)-H(7)     | 1.528(6)          |

---

|              |          |
|--------------|----------|
| C(8)-C(11)   | 1.529(6) |
| C(8)-C(10)   | 0.9600   |
| C(8)-C(9)    | 0.9600   |
| C(9)-H(9A)   | 0.9600   |
| C(9)-H(9B)   | 0.9600   |
| C(9)-H(9C)   | 0.9600   |
| C(10)-H(10A) | 0.9600   |
| C(10)-H(10B) | 0.9600   |
| C(10)-H(10C) | 0.9600   |
| C(11)-H(11A) | 0.9600   |
| C(11)-H(11B) | 0.9600   |
| C(11)-H(11C) | 0.9600   |
| C(12)-H(12A) | 0.9600   |
| C(12)-H(12B) | 1.385(5) |
| C(12)-H(12C) | 1.394(5) |
| C(13)-C(14)  | 1.411(5) |
| C(13)-C(18)  | 1.385(5) |
| C(14)-C(15)  | 1.548(5) |
| C(15)-C(16)  | 1.384(6) |
| C(15)-C(19)  | 0.9300   |
| C(16)-C(17)  | 1.369(5) |
| C(16)-H(16)  | 1.511(5) |
| C(17)-C(18)  | 0.9300   |
| C(17)-C(23)  | 1.530(7) |
| C(18)-H(18)  | 1.537(6) |
| C(19)-C(21)  | 1.547(5) |
| C(19)-C(20)  | 0.9600   |
| C(19)-C(22)  | 0.9600   |
| C(20)-H(20A) | 0.9600   |
| C(20)-H(20B) | 0.9600   |

---

---

|              |        |
|--------------|--------|
| C(20)-H(20C) | 0.9600 |
| C(21)-H(21A) | 0.9600 |
| C(21)-H(21B) | 0.9600 |
| C(21)-H(21C) | 0.9600 |
| C(22)-H(22A) | 0.9600 |
| C(22)-H(22B) | 0.9600 |
| C(22)-H(22C) | 0.9600 |
| C(23)-H(23A) | 0.9600 |
| C(23)-H(23B) |        |
| C(23)-H(23C) |        |

---

| Atom                 | Angle/°    |
|----------------------|------------|
| O(2)-Al(1)-O(1)      | 111.51(12) |
| O(2)-Al(1)-O(1)#1    | 120.56(12) |
| O(1)-Al(1)-O(1)#1    | 79.72(11)  |
| O(2)-Al(1)-O(3)      | 107.61(16) |
| O(1)-Al(1)-O(3)      | 123.14(16) |
| O(1)#1-Al(1)-O(3)    | 112.99(18) |
| O(2)-Al(1)-Al(1)#1   | 124.77(10) |
| O(1)-Al(1)-Al(1)#1   | 39.95(7)   |
| O(1)#1-Al(1)-Al(1)#1 | 39.77(7)   |
| O(3)-Al(1)-Al(1)#1   | 127.61(14) |
| C(3)-O(1)-Al(1)      | 123.0(2)   |
| C(3)-O(1)-Al(1)#1    | 126.0(2)   |
| Al(1)-O(1)-Al(1)#1   | 100.28(11) |
| C(14)-O(2)-Al(1)     | 156.7(2)   |
| Al(1)-O(3)-H(3)      | 109.5      |
| C(13)-C(1)-C(2)      | 112.9(3)   |
| C(13)-C(1)-H(1A)     | 109.0      |

---

---

|                  |          |
|------------------|----------|
| C(2)-C(1)-H(1A)  | 109.0    |
| C(13)-C(1)-H(1B) | 109.0    |
| C(2)-C(1)-H(1B)  | 109.0    |
| H(1A)-C(1)-H(1B) | 107.8    |
| C(7)-C(2)-C(3)   | 119.0(3) |
| C(7)-C(2)-C(1)   | 116.9(3) |
| C(3)-C(2)-C(1)   | 124.1(3) |
| C(2)-C(3)-C(4)   | 121.7(3) |
| C(2)-C(3)-O(1)   | 117.7(3) |
| C(4)-C(3)-O(1)   | 120.5(3) |
| C(5)-C(4)-C(3)   | 115.9(3) |
| C(5)-C(4)-C(8)   | 119.9(3) |
| C(3)-C(4)-C(8)   | 124.2(3) |
| C(4)-C(5)-C(6)   | 124.0(4) |
| C(4)-C(5)-H(5)   | 118.0    |
| C(6)-C(5)-H(5)   | 118.0    |
| C(7)-C(6)-C(5)   | 117.3(4) |
| C(7)-C(6)-C(12)  | 122.3(4) |
| C(5)-C(6)-C(12)  | 120.3(4) |
| C(2)-C(7)-C(6)   | 122.0(3) |
| C(2)-C(7)-H(7)   | 119.0    |
| C(6)-C(7)-H(7)   | 119.0    |
| C(11)-C(8)-C(10) | 106.4(4) |
| C(11)-C(8)-C(9)  | 110.1(4) |
| C(10)-C(8)-C(9)  | 106.4(4) |
| C(11)-C(8)-C(4)  | 112.1(3) |
| C(10)-C(8)-C(4)  | 111.7(3) |
| C(9)-C(8)-C(4)   | 110.0(3) |
| C(8)-C(9)-H(9A)  | 109.5    |
| C(8)-C(9)-H(9B)  | 109.5    |

---

---

|                     |          |
|---------------------|----------|
| H(9A)-C(9)-H(9B)    | 109.5    |
| C(8)-C(9)-H(9C)     | 109.5    |
| H(9A)-C(9)-H(9C)    | 109.5    |
| H(9B)-C(9)-H(9C)    | 109.5    |
| C(8)-C(10)-H(10A)   | 109.5    |
| C(8)-C(10)-H(10B)   | 109.5    |
| H(10A)-C(10)-H(10B) | 109.5    |
| C(8)-C(10)-H(10C)   | 109.5    |
| H(10A)-C(10)-H(10C) | 109.5    |
| H(10B)-C(10)-H(10C) | 109.5    |
| C(8)-C(11)-H(11A)   | 109.5    |
| C(8)-C(11)-H(11B)   | 109.5    |
| H(11A)-C(11)-H(11B) | 109.5    |
| C(8)-C(11)-H(11C)   | 109.5    |
| H(11A)-C(11)-H(11C) | 109.5    |
| H(11B)-C(11)-H(11C) | 109.5    |
| C(6)-C(12)-H(12A)   | 109.5    |
| C(6)-C(12)-H(12B)   | 109.5    |
| H(12A)-C(12)-H(12B) | 109.5    |
| C(6)-C(12)-H(12C)   | 109.5    |
| H(12A)-C(12)-H(12C) | 109.5    |
| H(12B)-C(12)-H(12C) | 109.5    |
| C(14)-C(13)-C(18)   | 119.7(3) |
| C(14)-C(13)-C(1)    | 119.8(3) |
| C(18)-C(13)-C(1)    | 120.5(3) |
| O(2)-C(14)-C(13)    | 118.4(3) |
| O(2)-C(14)-C(15)    | 121.1(3) |
| C(13)-C(14)-C(15)   | 120.6(3) |
| C(16)-C(15)-C(14)   | 116.9(4) |
| C(16)-C(15)-C(19)   | 121.1(3) |

---

---

|                     |          |
|---------------------|----------|
| C(14)-C(15)-C(19)   | 121.9(3) |
| C(17)-C(16)-C(15)   | 123.6(4) |
| C(17)-C(16)-H(16)   | 118.2    |
| C(15)-C(16)-H(16)   | 118.2    |
| C(18)-C(17)-C(16)   | 118.0(4) |
| C(18)-C(17)-C(23)   | 121.4(4) |
| C(16)-C(17)-C(23)   | 120.7(4) |
| C(17)-C(18)-C(13)   | 121.3(4) |
| C(17)-C(18)-H(18)   | 119.4    |
| C(13)-C(18)-H(18)   | 119.4    |
| C(21)-C(19)-C(20)   | 110.6(4) |
| C(21)-C(19)-C(22)   | 106.3(4) |
| C(20)-C(19)-C(22)   | 107.8(4) |
| C(21)-C(19)-C(15)   | 110.5(4) |
| C(20)-C(19)-C(15)   | 109.7(3) |
| C(22)-C(19)-C(15)   | 111.9(4) |
| C(19)-C(20)-H(20A)  | 109.5    |
| C(19)-C(20)-H(20B)  | 109.5    |
| H(20A)-C(20)-H(20B) | 109.5    |
| C(19)-C(20)-H(20C)  | 109.5    |
| H(20A)-C(20)-H(20C) | 109.5    |
| H(20B)-C(20)-H(20C) | 109.5    |
| C(19)-C(21)-H(21A)  | 109.5    |
| C(19)-C(21)-H(21B)  | 109.5    |
| H(21A)-C(21)-H(21B) | 109.5    |
| C(19)-C(21)-H(21C)  | 109.5    |
| H(21A)-C(21)-H(21C) | 109.5    |
| H(21B)-C(21)-H(21C) | 109.5    |
| C(19)-C(22)-H(22A)  | 109.5    |
| C(19)-C(22)-H(22B)  | 109.5    |

---



---

|                     |       |
|---------------------|-------|
| H(22A)-C(22)-H(22B) | 109.5 |
| C(19)-C(22)-H(22C)  | 109.5 |
| H(22A)-C(22)-H(22C) | 109.5 |
| H(22B)-C(22)-H(22C) | 109.5 |
| C(17)-C(23)-H(23A)  | 109.5 |
| C(17)-C(23)-H(23B)  | 109.5 |
| H(23A)-C(23)-H(23B) | 109.5 |
| C(17)-C(23)-H(23C)  | 109.5 |
| H(23A)-C(23)-H(23C) | 109.5 |
| H(23B)-C(23)-H(23C) | 109.5 |

---

**MALDI-TOF MS spectra of low-MW PMMA by PCy<sub>3</sub>/[Al(mbmp)Me]<sub>2</sub>**

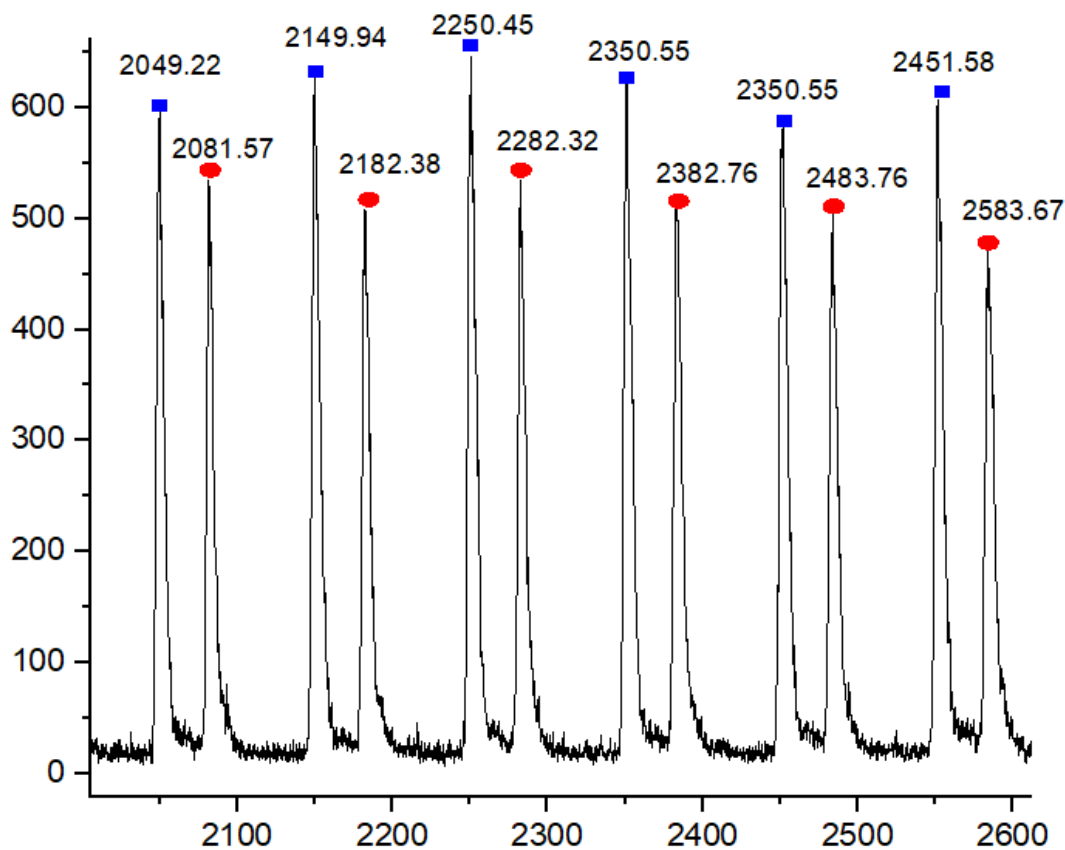

**Figure S41. MALDI-TOF mass spectrum of the low-MW PMMA sample produced by PCy<sub>3</sub>/[Al(mbmp)Me]<sub>2</sub> in toluene at RT.**

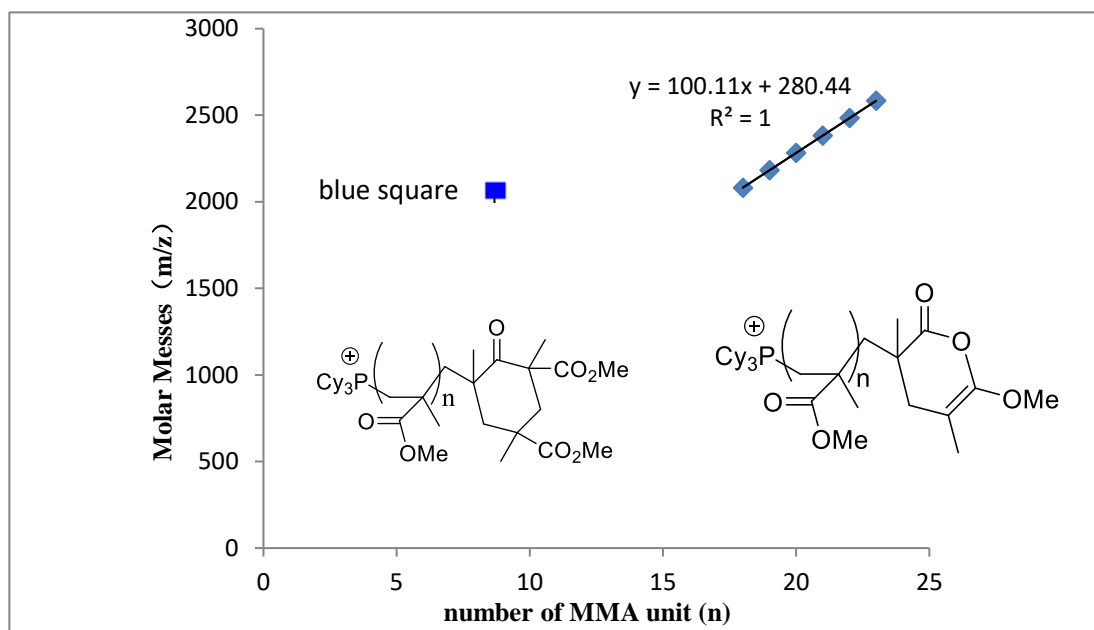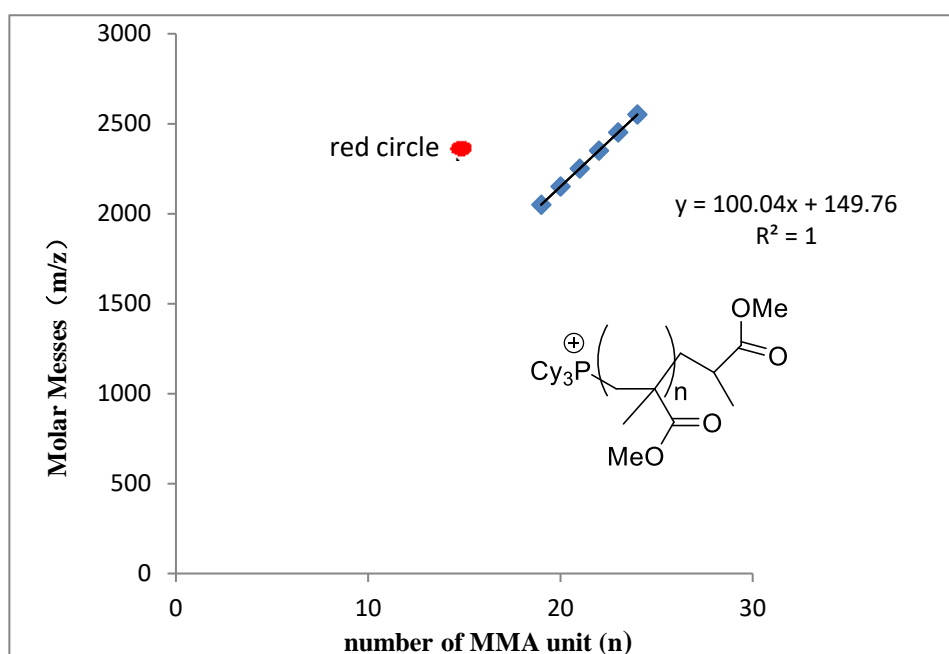

**Figure S42.** Plot of m/z values from Figure S38 vs the number of MMA repeat units (n).

### Selected GPC Traces of Polymer Products

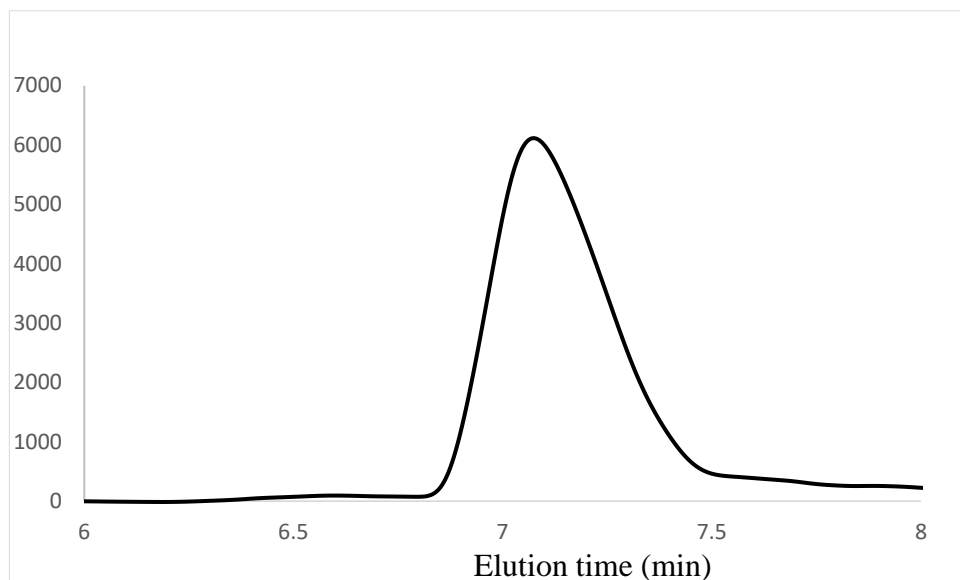

**Figure S43.** GPC (dRI) trace of PMMA synthesized by MMA/PCy<sub>3</sub>/[Al(mbmp)Me]<sub>2</sub> = 200/1/1 (Table 2, run 3; M<sub>n</sub> = 14.5 kg/mol, Đ = 1.1).

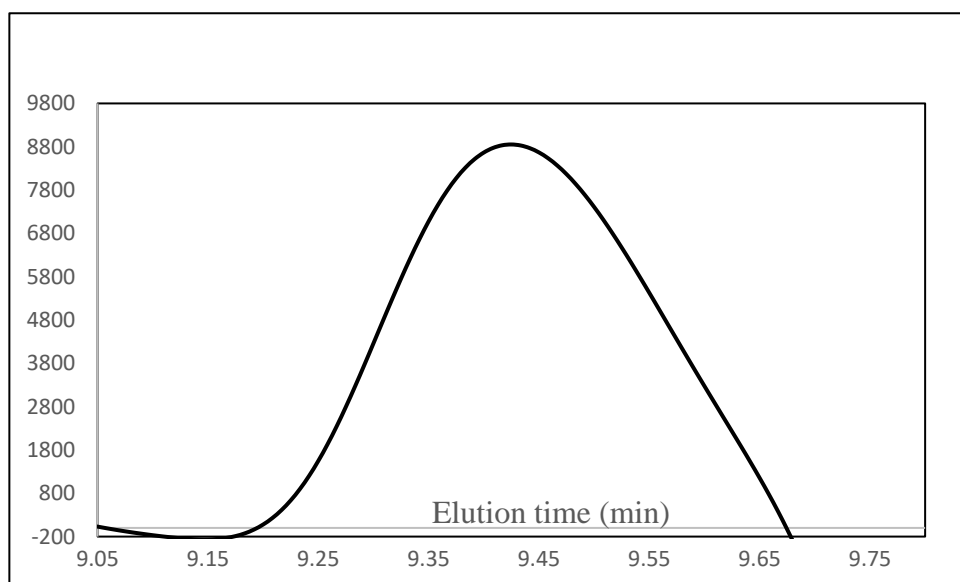

**Figure S44.** GPC (dRI) trace of PMMA synthesized by MMA/P(Ph)<sub>3</sub>(OMe)<sub>9</sub>/[Al(mbmp)Me]<sub>2</sub> = 200/1/1 (Table 2, run 2; M<sub>n</sub> = 0.46 kg/mol, Đ = 1.1).

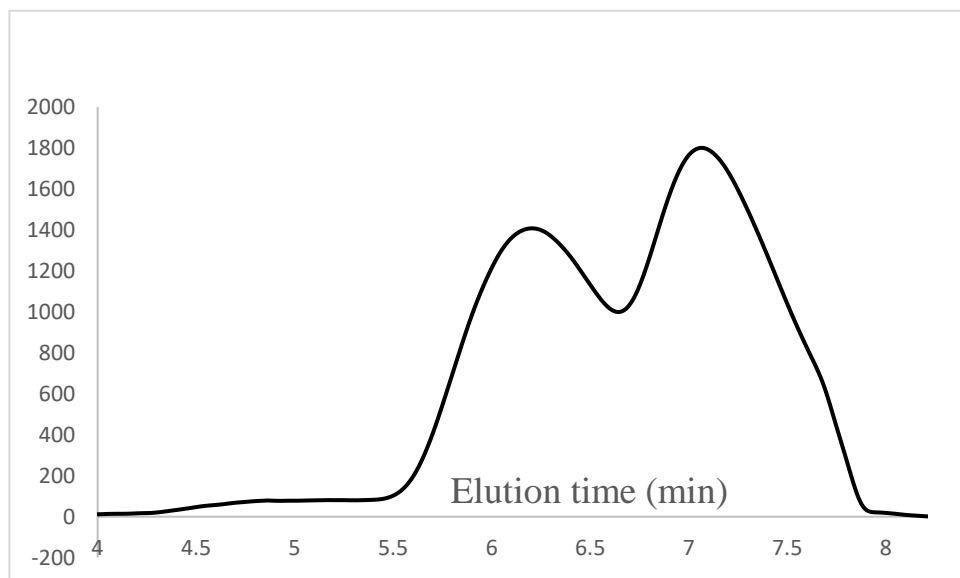

**Figure S45.** GPC (dRI) trace of PMMA synthesized by MMA/PEt<sub>3</sub>/[Al(mbmp)Me]<sub>2</sub> = 200/1/1 (Table 2, run 4; M<sub>n</sub> = 19.1 kg/mol, Đ = 3.7).

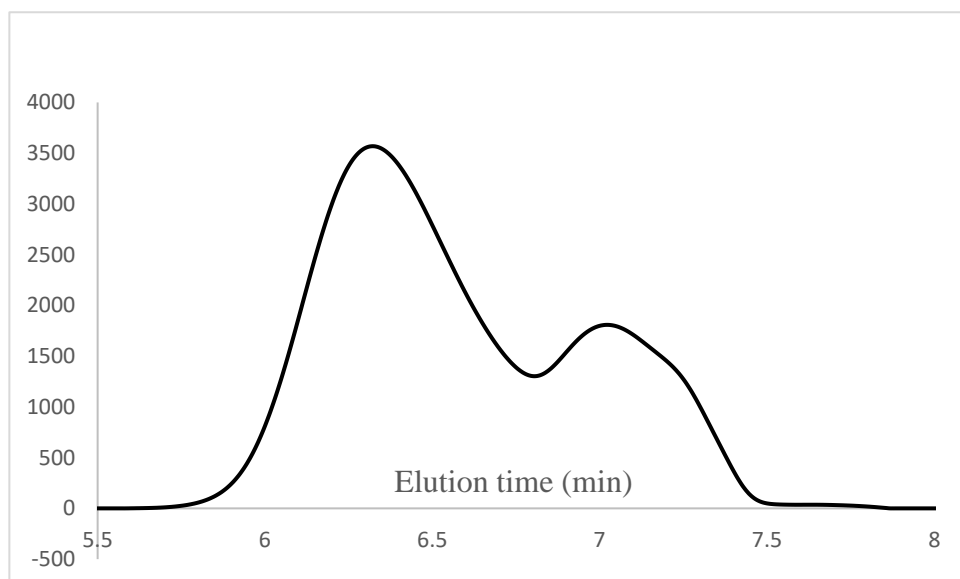

**Figure S46.** GPC (dRI) trace of PMMA synthesized by MMA/P(4-OCH<sub>3</sub>C<sub>6</sub>H<sub>5</sub>)<sub>3</sub>/[Al(mbmp)Me]<sub>2</sub> = 200/1/1 (Table 2, run 5; M<sub>n</sub> = 36.8 kg/mol, Đ = 1.9).

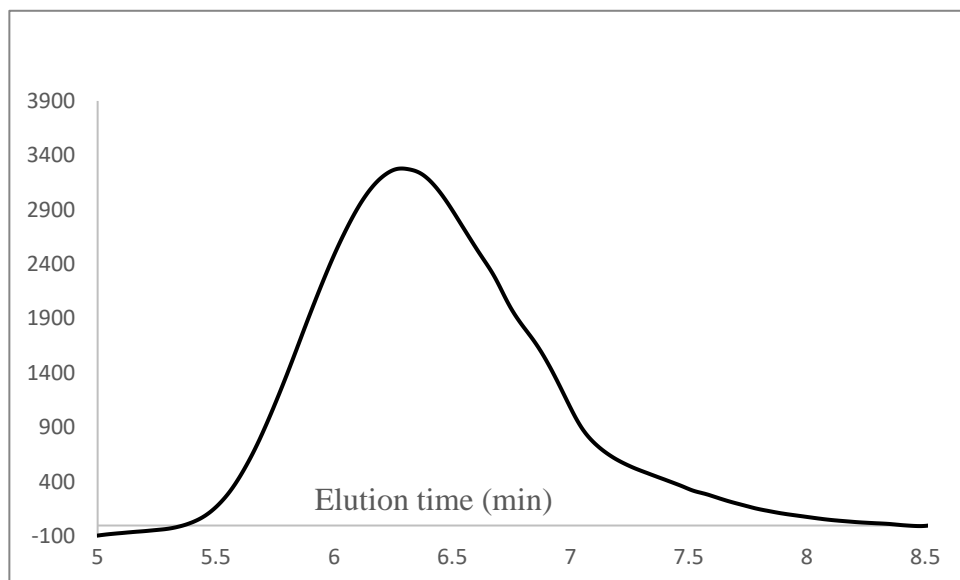

**Figure S47.** GPC (dRI) trace of PMMA synthesized by MMA/PPh<sub>3</sub>/[Al(mbmp)Me]<sub>2</sub> = 200/1/1 (Table 2, run 7; M<sub>n</sub> = 45.7 kg/mol, Đ = 2.5).

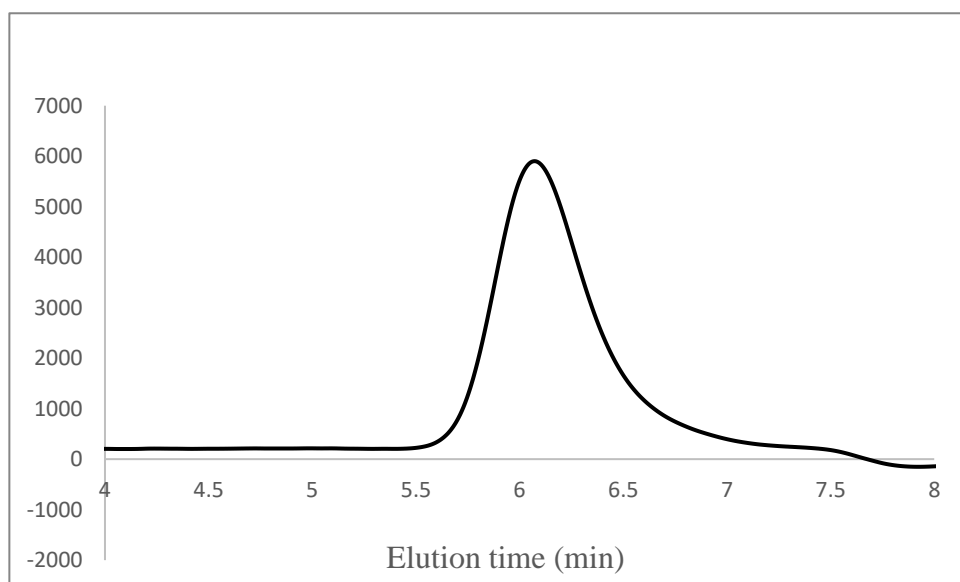

**Figure S48.** GPC (dRI) trace of PMMA synthesized by MMA/<sup>t</sup>BuNHC/[Al(mbmp)Me]<sub>2</sub> = 200/1/1 (Table 2, run 8; M<sub>n</sub> = 146 kg/mol, Đ = 1.4).

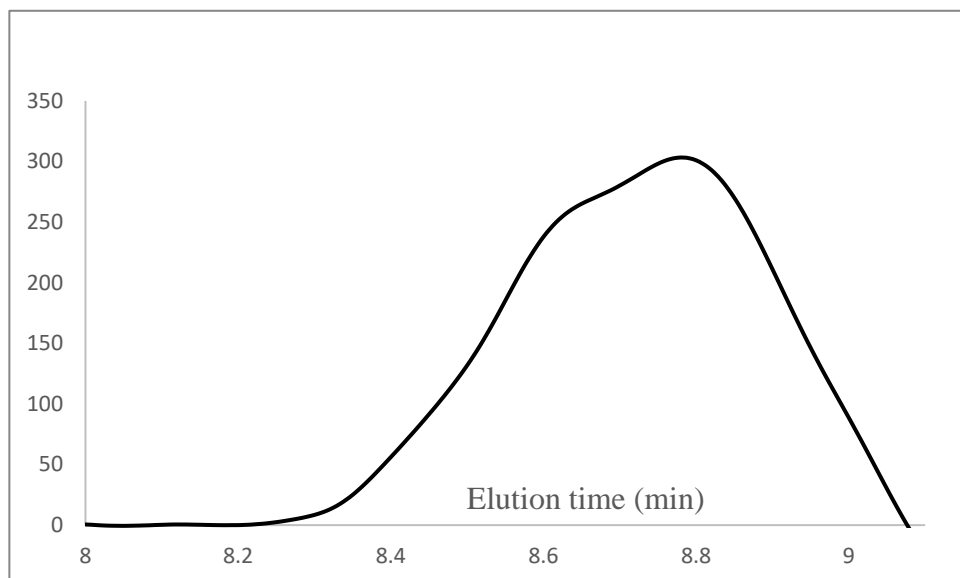

**Figure S49.** GPC (dRI) trace of PMMA synthesized by MMA/ $\text{MesNHC}$  / $[\text{Al}(\text{mbmp})\text{Me}]_2 = 200/1/1$  (Table 2, run 9;  $M_n = 0.53$  kg/mol,  $\text{Đ} = 1.2$ ).

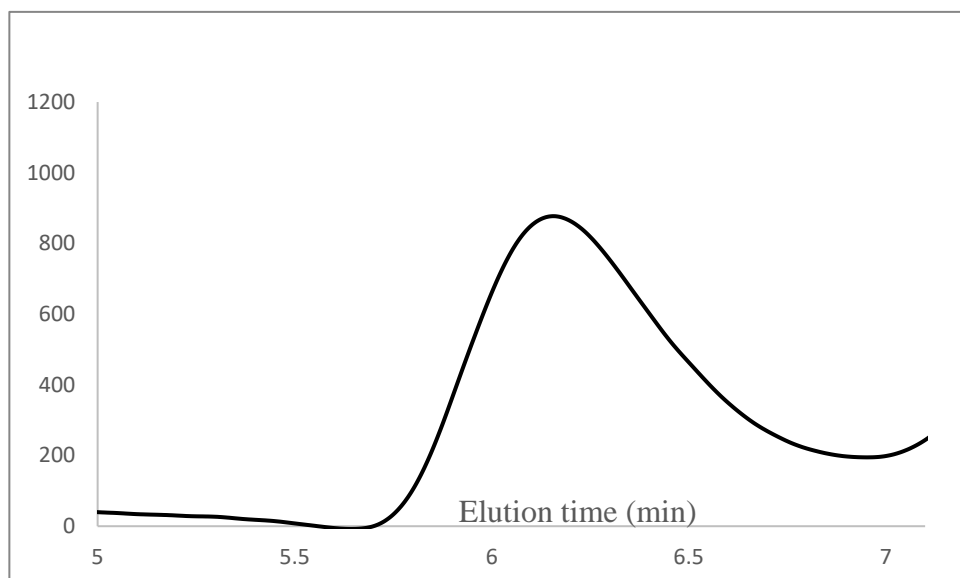

**Figure S50.** GPC (dRI) trace of PMMA synthesized by MMA/ $\text{PCy}_3/\text{MeAl}(\text{BHT})_2 = 200/1/1$  (SI, Table S4, run 1;  $M_n = 40.4$  kg/mol,  $\text{Đ} = 2.5$ ).

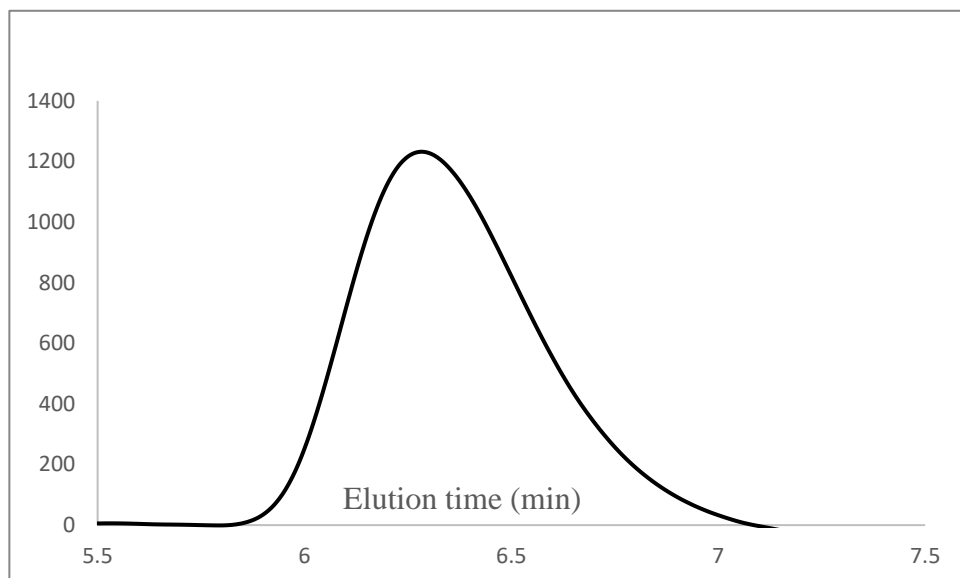

**Figure S51.** GPC (dRI) trace of PMMA synthesized by MMA/PEt<sub>3</sub>/MeAl(BHT)<sub>2</sub> = 200/1/1 (SI, Table S4, run 2; M<sub>n</sub> = 68.5 kg/mol, Đ = 1.3).

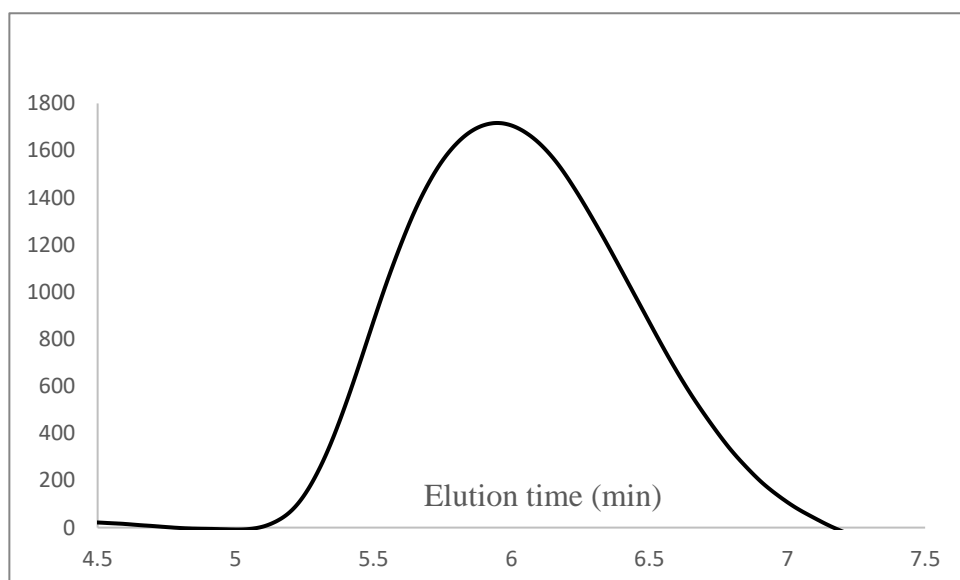

**Figure S52.** GPC (dRI) trace of PMMA synthesized by MMA/P(4-OCH<sub>3</sub>C<sub>6</sub>H<sub>5</sub>)<sub>3</sub>/MeAl(BHT)<sub>2</sub> = 200/1/1 (SI, Table S4, run 3; M<sub>n</sub> = 102 kg/mol, Đ = 2.2).

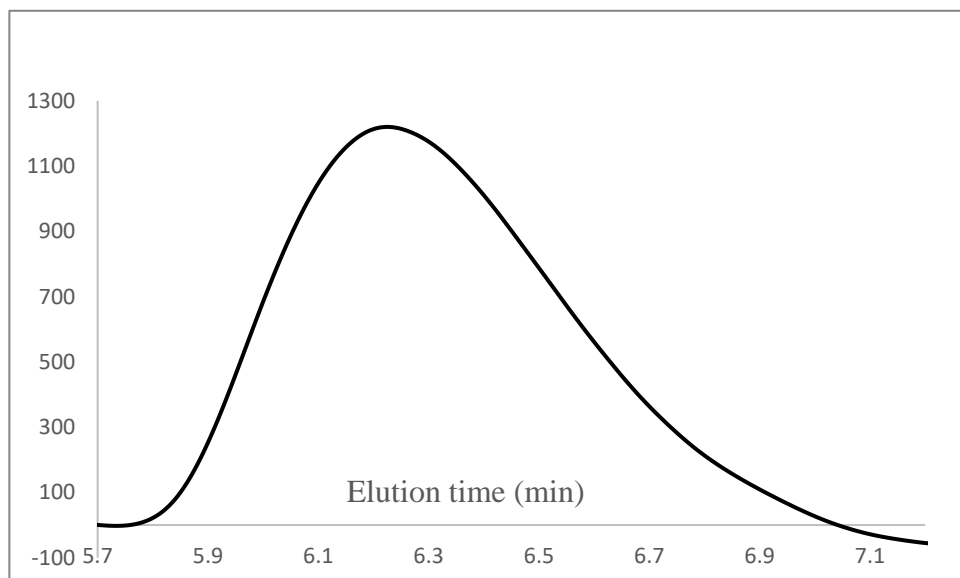

**Figure S53.** GPC (dRI) trace of PMMA synthesized by MMA/PCy<sub>3</sub>/*i*BuAl(BHT)<sub>2</sub> = 200/1/1 (SI, Table S4, run 6; M<sub>n</sub> = 76 kg/mol, Đ = 1.3).

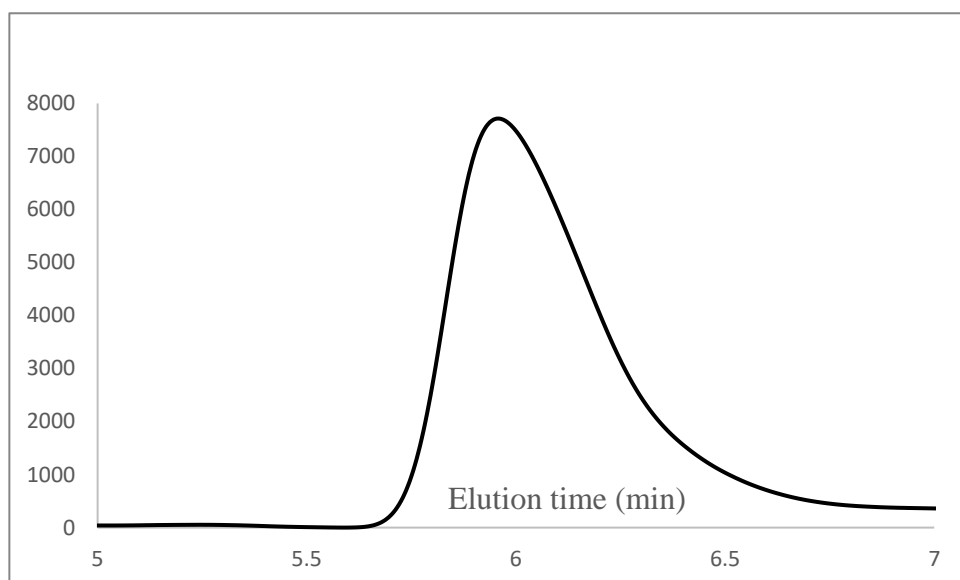

**Figure S54.** GPC (dRI) trace of PMMA synthesized by MMA/PEt<sub>3</sub>/*i*BuAl(BHT)<sub>2</sub> = 200/1/1 (SI, Table S4, run 7; M<sub>n</sub> = 103 kg/mol, Đ = 1.6).



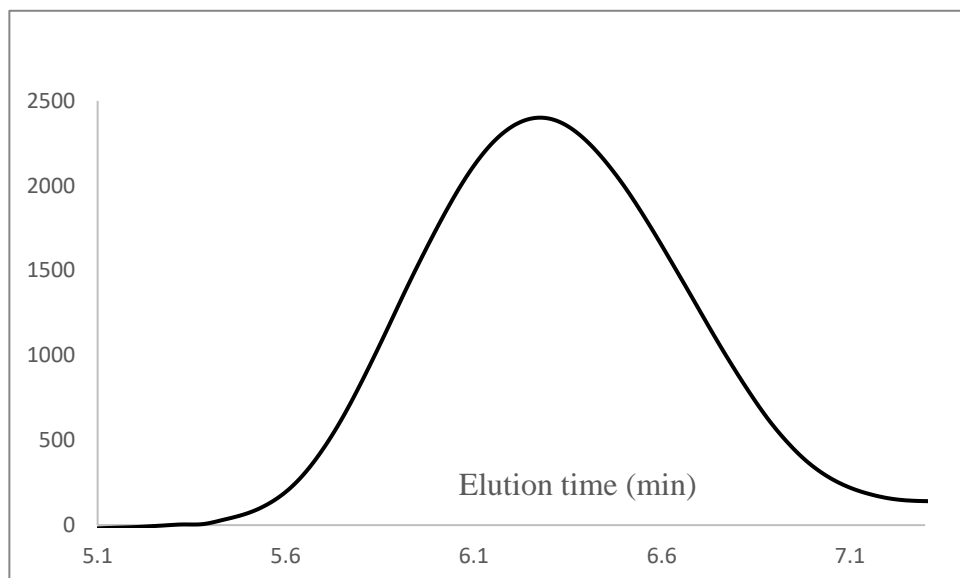

**Figure S55.** GPC (dRI) trace of PMMA synthesized by MMA/PCy<sub>3</sub><sup>*i*</sup>Bu<sub>2</sub>Al(BHT) = 200/1/1 (SI, Table S4, run 11; M<sub>n</sub> = 93 kg/mol, Đ = 1.5).

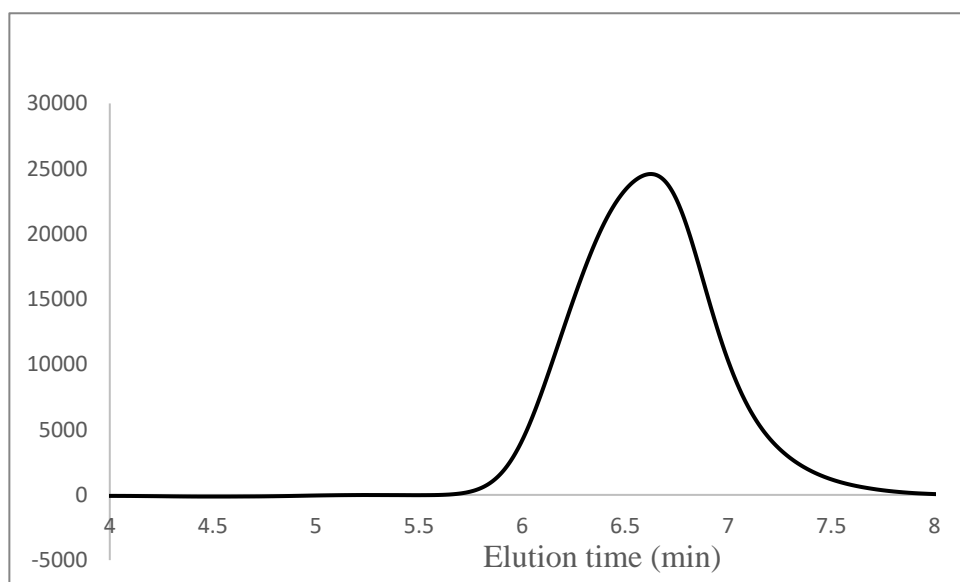

**Figure S56.** GPC (dRI) trace of PnBA synthesized by nBA/PEt<sub>3</sub>/MeAl(BHT)<sub>2</sub> = 200/1/1 (Table 3, run 8; M<sub>n</sub> = 93 kg/mol, Đ = 1.7).

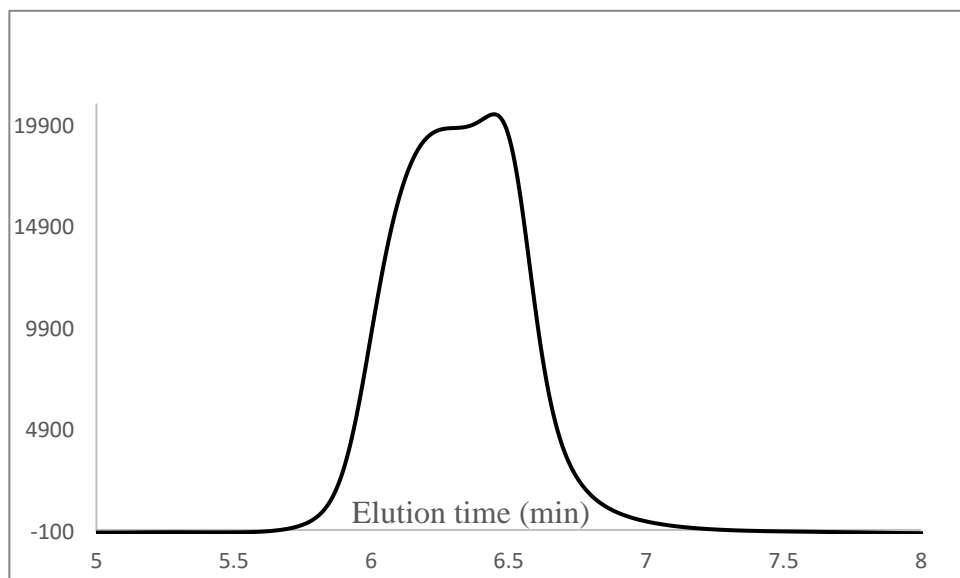

**Figure S57.** GPC (dRI) trace of PnBA synthesized by nBA/P(4-OCH<sub>3</sub>C<sub>6</sub>H<sub>5</sub>)<sub>3</sub>/MeAl(BHT)<sub>2</sub> = 200/1/1 (Table 3, run 9; M<sub>n</sub> = 79 kg/mol, Đ = 1.3).

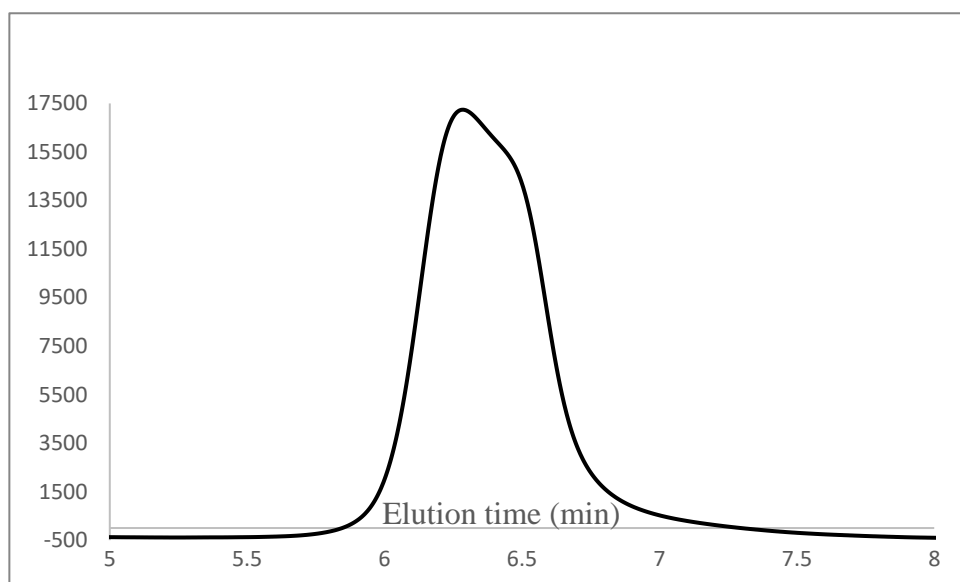

**Figure S58.** GPC (dRI) trace of PnBA synthesized by nBA/P(4-CH<sub>3</sub>C<sub>6</sub>H<sub>5</sub>)<sub>3</sub>/MeAl(BHT)<sub>2</sub> = 200/1/1 (Table 3, run10; M<sub>n</sub> = 64 kg/mol, Đ = 1.4).

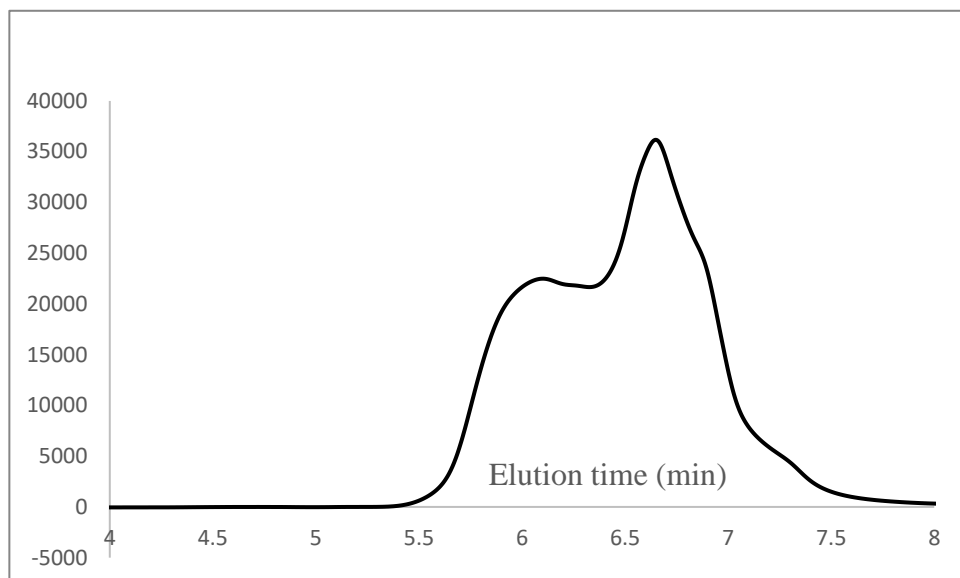

**Figure S59.** GPC (dRI) trace of PnBA synthesized by nBA/ $\text{PPh}_3$ / $\text{MeAl}(\text{BHT})_2 = 200/1/1$  (Table 3, run11;  $M_n = 44 \text{ kg/mol}$ ,  $\text{Đ} = 2.2$ ).

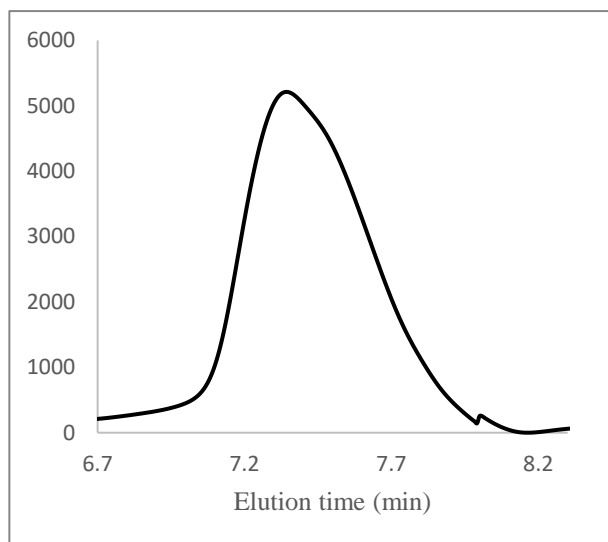

**Figure S60.** GPC (dRI) trace of PMMA synthesized by MMA/ $\text{P}(\text{Ph})_3(\text{OMe})_9$ / $[\text{Al}(\text{mbmp})\text{Me}]_2 = 200/1/0.5$  (SI, Table S6, run1;  $M_n = 7.7 \text{ kg/mol}$ ,  $\text{Đ} = 1.5$ ).

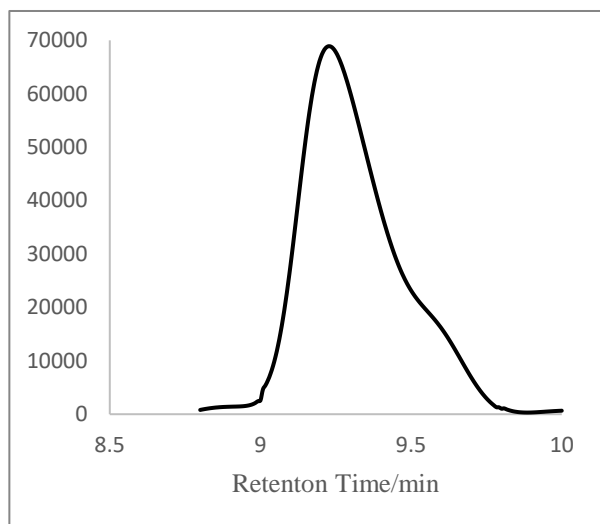

**Figure S61.** GPC (dRI) trace of PMMA synthesized by MMA/PCy<sub>3</sub>/[Al(mbmp)Me]<sub>2</sub> = 200/1/0.5 (SI, Table S6, run2; M<sub>n</sub> = 51 kg/mol, Đ = 1.4).

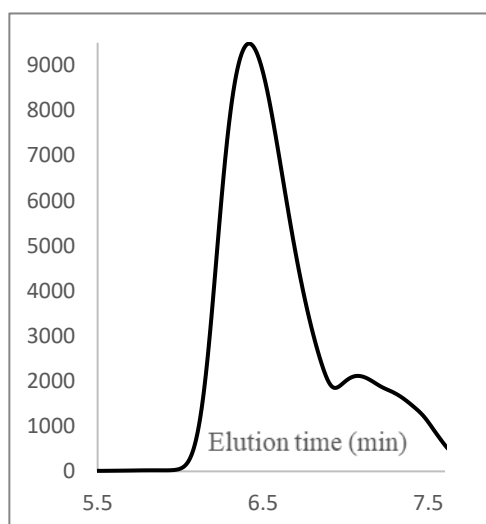

**Figure S62.** GPC (dRI) trace of PMMA synthesized by MMA/PEt<sub>3</sub>/[Al(mbmp)Me]<sub>2</sub> = 200/1/0.5 (SI, Table S6, run3; M<sub>n</sub> = 35 kg/mol, Đ = 1.7).

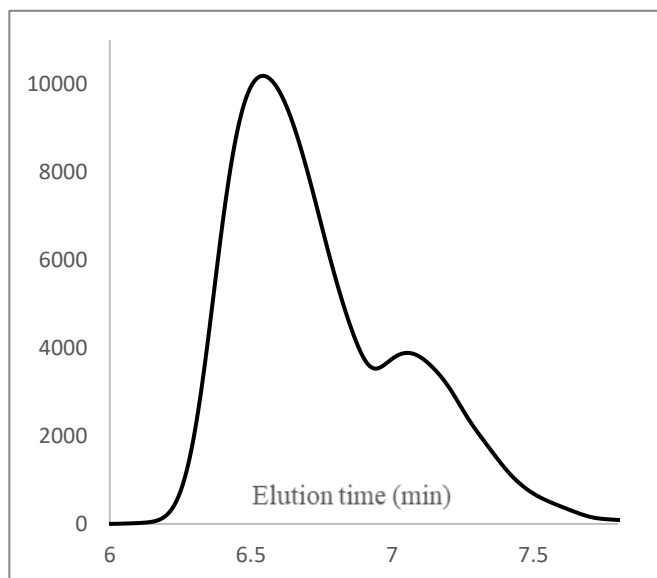

**Figure S63.** GPC (dRI) trace of PMMA synthesized by MMA/ P (4-OCH<sub>3</sub>C<sub>6</sub>H<sub>5</sub>)<sub>3</sub>/[Al(mbmp)Me]<sub>2</sub> = 200/1/0.5 (SI, Table S6, run4; M<sub>n</sub> = 28.6 kg/mol, Đ = 1.5).

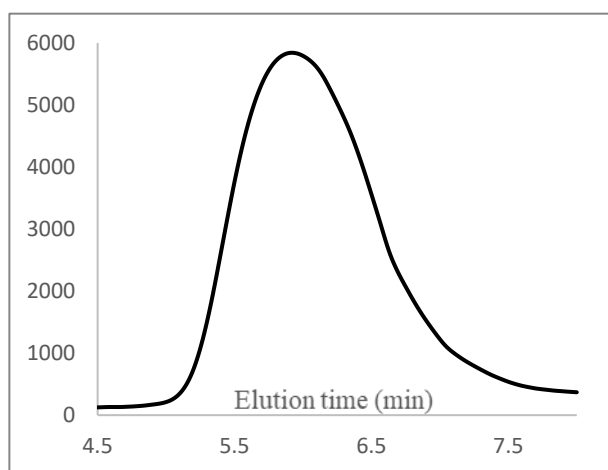

**Figure S64.** GPC (dRI) trace of PMMA synthesized by MMA/ PPh<sub>3</sub>/[Al(mbmp)Me]<sub>2</sub> = 200/1/0.5 (SI, Table S6, run6; M<sub>n</sub> = 87.6 kg/mol, Đ = 2.7).

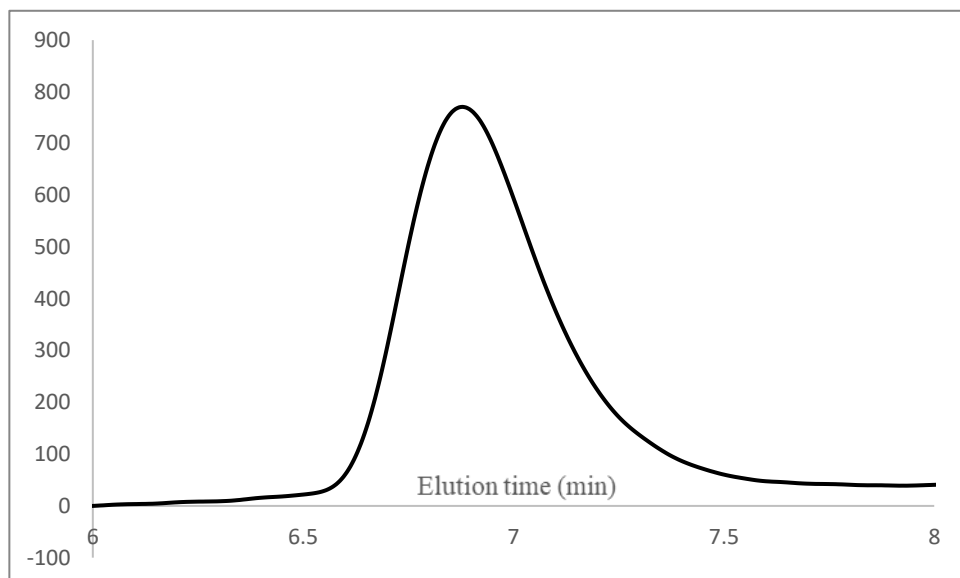

**Figure S65.** GPC (dRI) trace of PMMA synthesized by MMA/NHO-1/[Al(mbmp)Me]<sub>2</sub> = 200/1/1 (SI, Table S5, run1; M<sub>n</sub> = 58 kg/mol, Đ = 1.2).

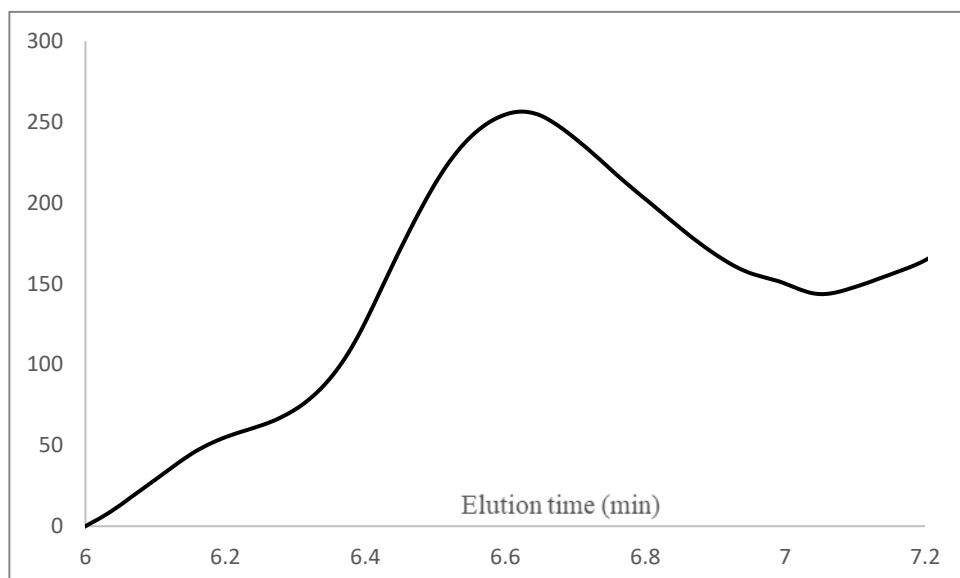

**Figure S66.** GPC (dRI) trace of PMMA synthesized by MMA/NHO-2/[Al(mbmp)Me]<sub>2</sub> = 200/1/1 (SI, Table S5, run2; M<sub>n</sub> = 58 kg/mol, Đ = 1.2).

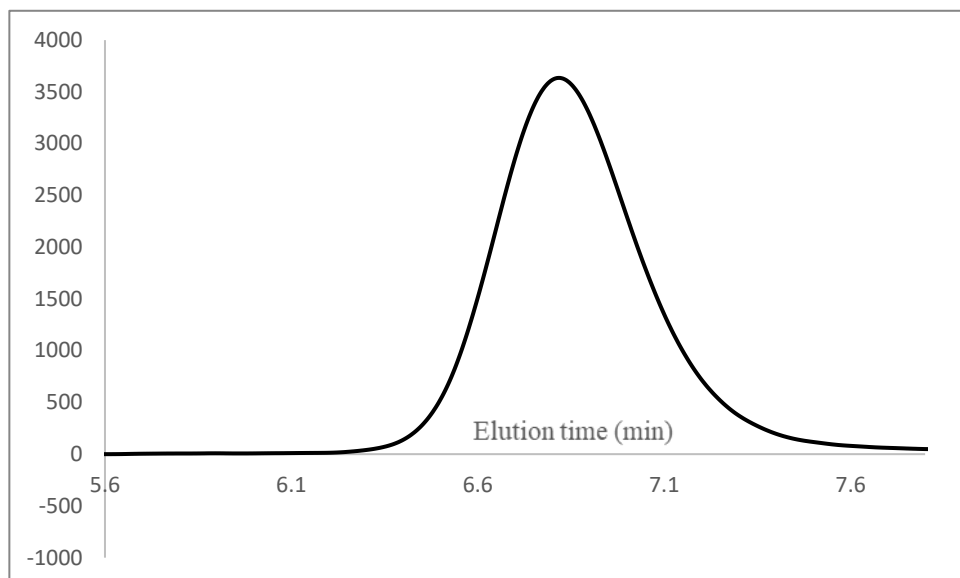

**Figure S67.** GPC (dRI) trace of PMMA synthesized by MMA/ NHO-1/Al(BHT)<sub>2</sub>Me = 200/1/1 (SI, Table S5, run3;  $M_n = 33.9$  kg/mol,  $\bar{D} = 1.2$ ).

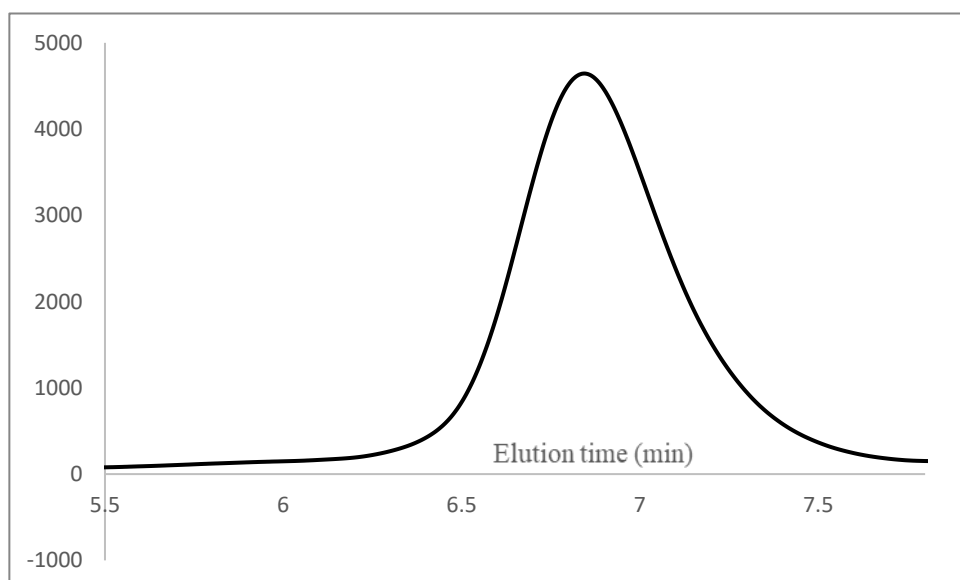

**Figure S68.** GPC (dRI) trace of PMMA synthesized by MMA/ NHO-2/Al(BHT)<sub>2</sub>Me = 200/1/1 (SI, Table S5, run4;  $M_n = 27.5$  kg/mol,  $\bar{D} = 1.5$ ).

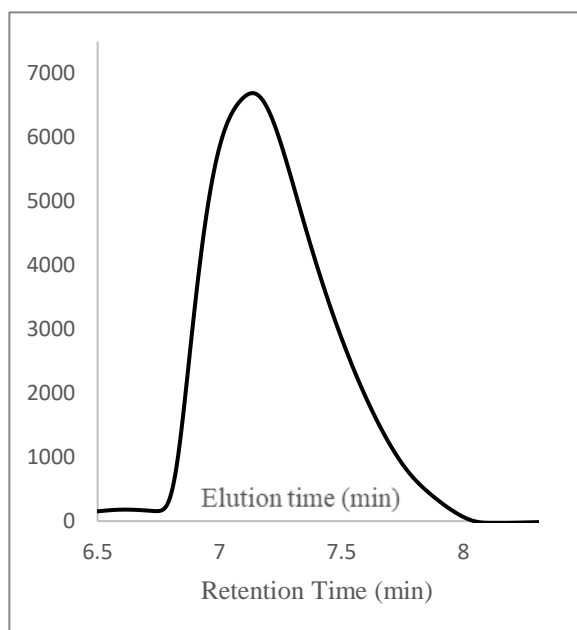

**Figure S69. GPC (dRI) trace of PMMA synthesized by MMA/ IAP-3/[Al(mbmp)Me]<sub>2</sub> = 200/1/1 (SI, Table S5, run7; M<sub>n</sub> = 11 kg/mol, Đ = 1.3).**

#### References

- [1] (a) E. E. Faingol'd, N. M. Bravaya, A. N. Panin, O. N. Babkina, S. L. Saratovskikh and V. I. Privalov, *J. Appl. Polym. Sci.*, 2016, **133**, 43276-43284. (b) R. A. Stapleton, A. Al-Humydi, J. Chai, B. R. Galan and S. Collins, *Organometallics*, 2006, **25**, 5083-5092.
- [2] (a) S. Naumann, W. Thomas Anthony and P. Dove Andrew, *Angew. Chem. Int. Ed.*, 2015, **54**, 9550-9554. (b) M. A. Wünsche, P. Mehlmann, T. Witteler, F. Buß, P. Rathmann and F. Dielmann, *Angew. Chem. Int. Ed.*, 2015, **54**, 11857-11860.
- [3] (a) Beckett, M. A.; Brassington, D. S.; Coles, S. J.; Hursthouse, M. B. *Inorg. Chem. Commun.* 2000, **3**, 530-533. (b) Heiden, Z. M.; Lathem, A. P. *Organometallics* 2015, **34**, 1818-1827.
